# Supplementary material for: Reproductive switching analysis of Daphnia similoides between sexual female and parthenogenetic female by transcriptome comparison
Source: PubMed Central journal article supplement (PMC5037449; doi:10.1038/srep34241), 2016-09-27
Supplement: srep34241-s1.pdf [file srep34241-s1.pdf]

**Reproductive switching analysis of *Daphnia similoides*  
between sexual female and parthenogenetic female by  
transcriptome comparison**

Ya-Nan Zhang, Xiu-Yun Zhu, Wen-Ping Wang, Yi Wang, Lu Wang, Xiao-Xue Xu,  
Kun Zhang, Dao-Gui Deng\*

College of Life Sciences, Huaibei Normal University, Huaibei, China

## **Additional information**

**Supplementary information** accompanies this paper at <http://www.nature.com/scientificreports>

**Figure S1. Gene ontology (GO) classification of *Daphne similoides* transcripts with Blast2GO program.**

**Table S1. Nucleotide sequences of top 30 differentially expressed genes in sexual females (SF) vs. parthenogenetic females (PF).**

**Table S2. Primers used for qPCR.**

**Figure S1. Gene ontology (GO) classification of *Daphne similoides* transcripts with Blast2GO program.**

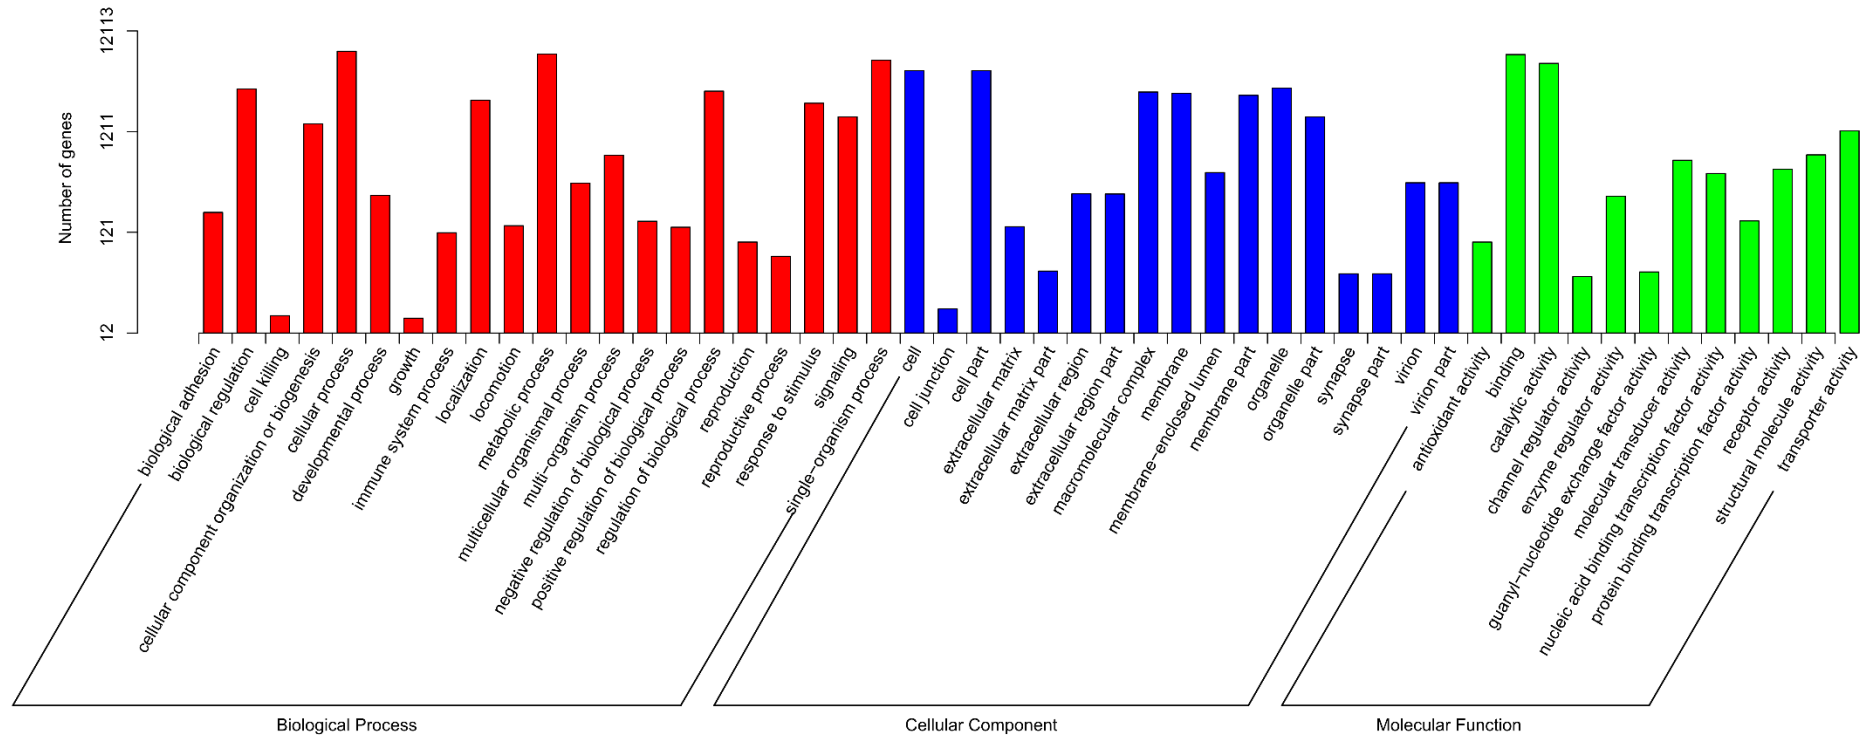

**Table S1. Nucleotide sequences of top 30 differentially expressed genes in sexual females (SF) vs. parthenogenetic females (PF).**

**SF vs PF up-regulated genes**

>1c22292\_g2

GGGGGGCACAGTTTCATTTGAACTATCTCAGCTCCAACATGAAGATTTTCCTTTTGGCCGCTCTTGTCGCCGT  
TGCTGCCGCTGGTGGAGTATACGACAAAGACCCCTACGCCAAGGGTGGTTACCAGCCGATGAGCTACGATA  
AAGACTCCTACGCCAAGGATGGTTACCAGTCGATGAGCTACGGTCAGGACTACAAAAAGACAACAAACAA  
GACTACAACATGGGTTACAATCAAGACAAGAAAGGCTATTCTACCCCGACTACTACCCGGTTCCAACACCC  
TACAACCTCGCCTATAAAGTAAAGGATGACTATACATAACAACACTTTGGCCAACAAGAGTCTGGTGACGGC  
TATGAAAACGTTAAAGGGTCTACTACGTCTACCTCCCGACGGCACCACTCAGACGGTCAACTACAAG

>2c18268\_g1

TTTTTTTTTTTTTTTTTTGATTTTATGATTGAAATGTATTTCCGTC AATGAAGCGCCTGTGTTAACTTCTTGTC  
CATACAAAACATTATAGAATCGATATTA AAAACCAGTTACAGCACAAGGAAAAATGTTAAGAGAATTTTGAA  
GTAAACAAGTCGTAATTCATTAACAATATAGAACTATATTTGATGGGCATCGGCCAGCAAACGGCTCAGTT  
TGACGGGGTT CAGTATAAAGGGGTTTGGCTTTGTGTCGTCATCGTTGATCGGTG TACTCGGGTAGGAAAATA  
GTATCTGGAATAACCTAAACCATCGCCATACCAACGTCTTCTTCGACTTCAGCTTCCATGCGTGTTCTACAAC  
AACTGCATCCTCTTCTTCGGTCTGCTCAATCTGATCCAGGCTAGCTTCGGCGTCACTAGTGGCAGTAGCTTCG  
GCTTCACTGGTGATAACAACCTCGAAGTCACTGGTGATAGCATCTTCGGTGT CATTGGTGGTAGCAGTCTCG  
GTGTCTTTGGTGGTAGCAGCCTTTTGATCTTCGGTTATGTTGGCCTTTGCTTCGACAACAATATCTTTGTTTT  
CAATTTCTTATCGAAGCATTCCGTGTCGAAAAGGCACAGATCCTCTTCGTTGGAGAGTAGTTGAGAGAAAA  
GCTCGGCCAAGATGATGTCCTCATTGCTGTTCTGTTGCTATTAATGTTGATGTTGGTGTGTCTGATTGGGG  
TCGCATCACCCAAGGACGATTGGGACGCTGAGGCTTTGGTCGATGAGTCGAGGGACGCTGAGGCTTGGGA  
TGTTGAGGCTTAGGTTTGTAAAGGTGTTGGATGTTGGGGCTTGGGCTTGTAAGGCGTTGGGTGTTGAGGCTT  
GGGTGGTAAGGCAAGGGTTAATGGGTTTAGGGTGGTAAGGCAAAGGACGATGGGGCTTGACAGGAAG  
GGGCTTGGGGTGGTGTGTAGGCCGATATGGAGATGGTCGATGTCTCCATACGGCGAAGTACGACGTT CAT  
CCGCATGAACATAGACCAAACAACGGCCAAGAAAATAGCTGCTGAAGCCGAGAATTT CATGTCGTTTCGT  
GGAGAAGGAGCTTGATGCTGTAGAAGAGAGGGGGAAGGCAAGTCTGCTGAATTTCCATCGATTTTTGCC  
TCTTTTATACCGAAGTGACGATGTTTAAACAGTCATTCAACACGGGCATCACGCTAATTACGGTATCCATTTTC  
TGAAGGACTTTTCAAGTAATTAAGCGTTCTCCAGTTTTCAATCGTTAAACAACGTGAACCTCGTTATCATC  
TTGTGCAATTTCTTGATTGCCATCTCGTACAGCTTCGATATTATTTGATTAATAATTAACGAAGGCACCGACTAA  
AAGGCCACCACTCCTTCCCCTCTCTTTGACGCATTTTGGTCTTTTCCTTTTCAAGCCTTGGAGAAATGATTCC  
AGACACTGACATCATTCTTTCTTCTTGAGACCCGTTTGGCCGGCCAGTTGAATCCGGCTTGTGTTTAC  
ATCAGTTGGGTTTTTTTTTACTGGAGATGTAACGGGTGCTGGTAGAAATCAGGTATGCACTGTGCACTTAATT  
TTTTTACGTTACCATTATCCTTTTTCAACAGGACGTCAAACTGGCTGCGCTGGACATGGAACGTGGGATA  
CGTAGAATGACCGTCTCTTGACGATCTATTGCCACAGCCGTCCAAGAAAATTTTGATAACTGTACCGTAGAG  
TCAATGTTGTTAAACTGCGTTCTTTTTGTAAAATTCGATGCGGAATATCGCTAAACCAAAGTCAATAAAAAA  
AAAAATTTTGATTGATGACGCTGAGGTTATCACAATAATCACGTCATATACAATCGCAAACATTTCCGCCGTC  
TAGGCTAGTTCTCGATTTTATTGACCCAGTCGATTCCGAAGCCGCTTCTCCACTAAAAC TAAAAACATACA  
GAGTAATACGATTTTTTTTTTAAATATCTTAAAGTTAAGTTGAAAAACCTTGATCAAAC TGTCAAATGAAAAA  
AGAATCTGAGATCATCTATGAAAATTAATGTGCATATGCGTTAAGAGATCGACGTGCCAAT TATCGGCAG  
CTGTATATTAACGAAAGCAGTGTTTTTGCAATACACTTTCTAATCTCTGAGAAGAAAAAATGATGCGCATT

ATCCCTATAAATGAAGTATTAGAATTGTGTACCGCAAGTTAGAACTCTGCTTGTGCTGAACGATAGCGTTTCT  
TCCCGTTCATGATAGGCAGTGGTCGTAGCCTTGAGGATTCAAATTCTCGAACAGAGTACCGTTGGAGCACCT  
GCCGTTGTGCACGCGTTTCAAAAGGTGTCGTTTATCACGAATCAACCACGAGAGATGACAATCGTCACAGAC  
GAAAGGATTGTTGTGGACGTAAAGGCCAGCCGTGGATGTCACGTAACCTCATTTGCTGCAGCATGTCTTCGTA  
AACGGCCGAATCGAACCGAGTCAGCCGATTGAAGTCGAGATAAACGAGGGCTTCAGAAAAATCTCCTTGG  
AAAGCACCTGGCTCGATGTCGTTAGGGCATTCTTAGACAAGATAAGGAACGCGACGCGAACGTCTGGACT  
AAAAGCGAGTGATCCTTTAGGAATTGTGCGGATGGCATTCCCGAAGAAATTGACGTAGCTCAACTTCTGAA  
AGAAGTACACCGTCTGGGATACGTGTCAATCGATTTCCACAAAATCAGCTGTTGTAGAGTTTCGTTTCCA  
GTTGGCGACGAAGTAATCGAATCACTAGTTTATTACAGGGCGATCTCCAGCTGAGTTCGTTCCAAGAAG  
AGAGATTCCAGCAGAGGCAGTCGATCAGCAATTTGATTCCAGTGCTGAAAATCCAGGCATTTCGTAATCTC  
AACGATCTGAGACGGGCGAGAAAAGCCATCGGTGGGAATCCTCGAAAATTGATGGATCGAGTAATACTCAG  
ACTAATCAATCGAGTACTATTAGCCAAGAATTCAAACCCAGCCGGCTGAGGTCACATCCAGCTACTTCGAA  
ATGTCCGATGTGATGGAGCGATGATCTGAAAGCATCCGGATGGATTTCAAACGCAAAGGGCCAGCAATCG  
AGGTACAATTGATGGCGATTCGATCGACGCTTTGCCATTACAGCAAATCAGCTGGTATCTTGATGATGTCCT  
AGACTCGCTCTCGGTGGCCAAGGAGAGCAAATCTAGCCAATAATGTGTCTAACCTTTGTGCGATTGAAAAC  
TTTCAAACGTCGAGGGCCGTCACGGGTAACCTGTGCTACGGCACCTCCGCAATGCACAACCAATCCGTA  
AGGTTTCGTAATCTCACAGACACAAGGCGAATAATCGCTACAGACGAAAGCATCGCGTGACGTGTAATGCC  
GCACGATGATGAGAGCGTCCATGGTCAACACGAGAAACAGGATAAACAGCATCACAAGAAAGTAGACTGG  
ATCAACGGGCTCAGTCTCTGCGTACCTACTGGGCCATGGTTGACGT

>3 c36850\_g1

TTTTTTTTTTTTTTTTTTTTTTCATTGTTAGATATTGATTTTTCTGTCTCTCTTTTCATTAAGCCACGTTGCCATGATT  
TAGTTGAAACAGTGACATAAAAAATCCCATTGTATCCCAAATTTAACTTATCATAAATTTATCAGAATAGGTCTT  
TAGTAGCAGAAGAGGCGTCAAAGGAGATTCAACCAGAATATTCATTAGCGTATCCAGATCCCATTTGAAGG  
TAAGGGGAAGGTGGGGGGTTGGCAAATGGGTGCCGGTAGGCTGGTAGCCATTTTCGTCGGCAACCCAG  
GACAAGGAGATTTCTCGCCTTCTGGAGAAATCCAGTAAACAGTTCCCTGGTTGGTGTTCGTAAGCTTTA  
TCGTAACAGGTTTCCGTACGAATCGTAGTTCGTTGAGGGGATCAATTTCTGGTACTGGGACTCTTGCCGG  
GCGGTGTAGTCAGACTGAAGGTAGTCGAAAGAGCTGCTGCCATCAGTTTTGCGGTAATCGGACTGGCTGAT  
GATGTAGATACCGGAGTAATCTTGGCCATACTTTTGGGAGCCATAGTTCGACTGCATGTAGCCAGAGTCCTTC  
ATGTAGCCAGAGTCCTTCATGTAGCCAGAGTCCTTCATGTAGCCAGAGTCCTTCATGTAGCCAGAGTCCTCA  
TGTAGCCAGAGTCCTTCATGTAGCCAGAGTCCTTCATGTAGCCAGAGTCCT

>4 c22292\_g1

TTTTTTTTTTTTTTTTTTTTTTCGCGTCAAATAAATCTATTTACTTCTTAGTCTTCATACAAATAATTATGAATAA  
AATATGTTGTACAAGAATTGGTCGTCAGCAGAGGCACATCATTGCTTAGTACTGGCTTAGTACTTTTTGGGTG  
GTGGGTAATCGTTTTTGTAAAGTCCGATGAGTAAGCAGATGGAGTTGGGTATTTATCCATGTAAGTAGTAG  
GTGGGTACATTGGTGGGTATTTCAGGCTTGTATGAAGGGGTGGGTGGAGTGTAAGAAGAAGCACCTTTGTAT  
GATGTTGGGGGGTAAGACGAAGATCCCTTGTATGAGGGTGTAGGTGAGGAGTAAGACGAAGCACCTTGT  
ATGGAGCCGGGCCGTAGTTGTACCGTACTTGGGTTCTCCGGTGTATTGAACGTCAGCGACATATCCGTAAG  
AGTCGGCCTTGTAGT

>5 c13553\_g1

AAAAAAAATCATTGTCGACCTTTGCAGCAGTCACAGGTCTCTAAACCTAATCATCAACATGCAGAAAAACC  
TCATTAGCTTGATGTTGCTGGTGGCAGCCGTTACATCAGCCAATTTAGATCCAAACAACGTCGAGCCATTTGC

CAACTGGATTCCCAAAGAATCTCCCATCAATTACCGTATCGATTCTCGTATACGCAGACAAGTTCCTTCTACTG  
ATACTAAAGAGGAAGCATCAGCTTCAAACGATGTGCCAATTATTGACGGATCTACTCTCATAACGGAATTGGC  
AACTGTTAGAGTCTACCACGAGCGTTAAGCAGGCAAGTTCAGCCATTAGCTTGCCCGTAGACACTTCAGC  
AATATCTCTCAACAGCTGCATTTTCATTAAGTTGAAACTTGTGCATCATCAACATTCCGGATCCCGTTTCTG  
CAGCACAATCTGCGCCGTAATTCCCATTGCACCCATATCTCGTACGAACCTCAGATGAGCGGAGGCACCTG  
CACGCTGCATAAAGCTCCCGTTTGGGTAACGAGTGGTCGAGTCCCGCACCCCGAAGCTCAGGTGCCACTT  
GTGGTCAGGTCCCGAAGAAGAACAAGTGTGTTTCTGGCGACGGATCGTTCTGAATCTGAACTTGTGCCTC  
GATCTGAGCATTAGCCTAGGTCTACTTTAAATTGGGAAAATTAATTATATCCATAGGTCTTCGCTTACGAATG  
GCAAAAGGATGTGGGATTTTCAATTGGGATTTTTTGGCTTAAATTGGTTTTGGTTTTTTCGGGAACGATG  
TAATACACCCCTTTAGAACGACAAAACGACAAAACGA

>6 c13267\_g1

TTTTTTTTTTTTTTTTTTCGTTTTCAAGGTATGTTTTTTTTTCTTGTTTTTACCAGTGTGTATTAACCAAGTAT  
CCAATATTAGAAATCCATTGCTTTGCAAGTCGAAAATCTAGTCTAGCCATAAAAAATTTATAGCAATAAGAAT  
TAAAAATAAAATCGTTGGTCAGTGCCTTGATTGGTCCGTTTCAGATCACTCGGTGATTGAAGAATCTTAGAG  
AAATCAGCAGGATTTGTGTGCATTTTGGCTGGGGTTTTAGTTTTTTCAGATCCATGTTTTGCGACTCCATGTC  
TGAAGTCTCGCTCTCCGGTGCAGCTGTGCGGAAGTTAGTTTCGAGAATGCCTCATTGAACAGCTGTGTTGC  
CTCGCTCGATTTTTCGTCGGACTCTGATTTTTCGTTTTTCGCTTGTTTTAAATGAAGAAAGGATCTAAATTT  
AAACCGAATGGGAATTCTGAAGGCTTCTCTGCGTGAGAACCGTGCATGTTGGGTAGGAAGAACAATGTTT  
GCAAGGCTTTTCTTTGTAGTGTCCATGGTGGTGGCTGTAGATAGGGACCACTGGAGGTCTAGGCTTGTA  
GGTCGGCTTGGCTTGTAGGTGGTGTGGGTTTTGTAGTAGGCTTGGGCTTGTACGTCGGCTTGTGTGTCG  
GTTTGTATGTCGGCTTGTATGTCGGCTTGTGTGTCGGTTTGTGGGTAGGCTTGTATGTCGGTTTGTGGGTAG  
GCTTGTATGTCGGTTTGTGGGTAGGCTTGTAGGTGGCTTGTGGGTAGGCTTGTACGTAGGCTTGTACGAAG  
GCTTGTGAGTAGGCTTGTACGAAGGCTTGTAGGTGGCTTGGGCTGTAAGTGGGGACTACTGGAGGCCT  
GGGTGTCTCAATCGGAATGGGTTCTCTGGGCCAGACTCTGCAATGCTCACCAGAAAGTCGAACAAGATGT  
TATCGTTACTATTGCTGTTGTCGTTGATGTTTCGTTGCTTTCGTTTGTCTGCATGTATAGCACTCGAATTAACG

>7 c14229\_g1

ATTTTTTTTTTTTTTTTTTTTTTGGTTTTTAAATGCAATTTTATTCGTTTTTTCAGTGTCTAAAAATACAGGGATC  
TAAAAACTCAACAGATTTTCCAATACGTTTAAATTAATTGTTAGAACAACGAATGCAAGTTTCAGATTTTA  
AGAAGTGGTCGTTGGTAGCGTCAAGTAAGTAACTGAAAAATCTAGTAGCTTGGGTATTTGTATGCTGGACGGTAC  
ACGGGTCCTTTATTGTTACCGTAAGACATGGGCGAGTACCCGTTGTTACCATTGTAATCCATCGGAGATG  
GGCCTTACCATCCGCCATTAGAGTATCCGCCCTTTTGGTATGCATCCATGGGAGATGGGCCTTACCATAT  
CCACCATTGGAGTATCCACCGTTAGAGTATCCACCG

>8 c20567\_g1 +2

CCGGGATAGCGTCAGTCGTCAAAGCTCTTGCTTTTCAGAGTTCGCTTCTTCCGCTAACTGCTTTCAAGCATT  
ACAAAGTCTTTTTTCGCCCCGATATTACTGAATTTGATTTATCTTCTTTTGAATCTAAATCTCATATCCAGTTT  
GAAAAAATGGCAAACCTTACTGGTGTGCTGTGGTGGCCATGGCCAGAAGCAGGCTTTTCGATCCATGGGC  
TTTGCCCCGATACCTTACCATCTATGCCTACGCCAGAGGACATTTCGAGCTTCTTCATCCTCACTGGCATA  
CCTACAAGGCTTTACATCCTGCTTGGTATTACTTCTTGGGATTGATGACTTGGTCATCGGTACTTGCGCCGTT  
GCCGGTAACGCCGTCGTTCTGAAGATCTTACGCCGATCCCAGCACTTAGAAGTCCCGCCAATTTATTGGTG  
ATGAATTTGGCTGTCTCGGATTTCTTCTGATGCTCGCTCTTCCCGAATGCGTCTATAACTTCTTCTTGGC  
GGTCCATGGCGCTTTGGAGAAATGGGCTGCCAGATCCACGCTTCTTGGGTGCTTGTTCGGATACAACCA

GATTTTCACTTTGACCATGATCTCCTACGATCGCTATAATGTGATTGTAAAGGGATTTCAGTGGAACGCCATTGA  
CGTTTAAACCGCGCTGTAACAATAATCACGATGAGCTGGATTTGGGCTTTGGGCTGGTCAATCTGCCCGTTGG  
TCGGTTGGGGTGCCTACGCCATGGATGGTATCATGGGAACATGCTCGTATGACTACGTCTCCAAAAACATGA  
ATAACAAGAGCCACATCTTGGCTGCCACTTTCGCCAACTATATCCTGCCAATCATGGTTATTGCTGGTTGTTAT  
TACTTCATCGTTCATGCAGTCTTCAAGCACGAGGAAGAACTTCGCGCCCAGGCCAAAAAGATGAATGTTGCT  
TCTCTTCGTAGCAATACCGACCAGCAACAGGTGTCGGCCGAGATTTCGATTGCAAAGGTCTCAATCATGAAC  
GTATCGTTGTGGTTGACTGCATGGACTCCTTTTGGCCTTATCTGCATCATGGGCACATGGGGTGATGTCTCCA  
AGATTACTCCTTTGGTATCTGCTATTCTGTGATCTTGGCTAAAACATCTTGCAGTACAATCCTCTCATTATG  
CCATCTCTCATCTAAATACCGAGAATGCCTCAAGCAGATGTTCCCTGGATGTGTATCGTTGAAGAGAAGAA  
GACAGCAGCCGACAATCAATCCGTATCACAGAGAAAACGAAACAACCGAAATTGTCAAGTGCGAATCAG  
CCTAAGCCTTTGGAGCCTGAAAAATGATCCTCTTGGTGTGGTAGTGATAGGTTTGGTGGTATGACGGC  
TATCATTTTGGATGACGACACTGATTATCGATCTAGACCCAGCGAATGTGAATTTACTAAGCGATTATTATG  
AATTTCTGTTAAATATCGTTCTTTCTCGTCCCAAATATTTGTTGGATTTATGTTTTCTCGAAAACATTTTCGT  
ATTTGACAACAAAGAGCTGTTGAATATACTAAATGCAAATATGGTGTACTCTTATATCTTCGTTTATATCT  
TTCTGTGCTTGC

>9 c1950\_g1

TGGCAGTGGATCCATGTATGGTAACGATGGTTACATGAAACCAAACACTACAACAACGGCGGGTACAACAAGG  
GCAGCTCACCTTACGGATCAGGATACAACAAAGGCATGGGCTACATGGGCTAAACCACACAGCAACTCCATT  
TCAACTCACATTTAGCAATCCGACTAGCTGATGATCGATTCAAGAATTTATCTTCCAATTGGCTATAGTTG  
AAGTCTCCTTAGGCTTTTACTTGTTCCTCCCCCGCCCCAAAAAAAATATTTAAAAAATCCTTTTCTGTTTG  
TCTAAGGTGAAATAAACAAAGGCAGCATAAAAGCAAAAAAAAAAAAAAAAAAATATGGTGACAAGATTGTA  
ATAAAAAAAAAATATGGTAATTAATCGAGATATAAGAATAGTGAGGGATAAACTCTGTTGGGGAGAGAGAAAG  
TCATTTGTTATTTATAGCGTGCTCAAGAAAGAATCGATCTGGCCGCTAGCGAAAAGTGGGGCGAGCTTCTTGA  
GGGATCACCTCGGTGCCTGCGTTGCTGGAAGTGCAGCCTGGCCTGCTGCTGGAAGTACCGGGGAAATT  
GCTGCTCGGCCGTCAGTCGGGGAGCCTGAGGAACACCCTGAGGTACGGGAGCGAAGACAACGGCCGGCT  
GCAGACGGCGCGTTCGTTCTTTCGGCGATGCGCTGGCGTTCGTCGGCCAAACGCTGCTGTTCCAGCTGC  
TGTCGGCGAGCTTCCGCTCCTGGCGAGCGGTTCTGTTCTGTTACGTTGGCCTGGATCTGAGGGAAAAC  
TGGGCGTTGTTCTGGAACGATGGAGTCTGGAAGACCTGAGTGTTCGTTCAACTGAGGGAATTGCGGAC  
GTTGTTACGGGGCTGCTCACGGGGCTGCTCACGGGGCTGTTACGAACTTGTCCGGACGAGGGGTGGT  
AGACGGAGAGAAAGCAATCAGCTGATCGCGAATCGGAAGTCTCCTGAGTGGCCGGGATGAACTGCTGA  
GAGGCTGACTGGAAGTGGTTGGACCTGGGATCGAAAACGAGCTCAGTTGCAAAGCTGCGTTGGCCGGTG  
GGCCTGGGAGGTTCCGGACGCTTCTCTTGGCTGTTTATTGCGCTGGACAAAGACTTCTCTTCTCGTCG  
AAAATGGGACGCTCGGCGGGCGGGGCTGGACGAGGAGCGACGGGGGTCAAGACTGGACGGAATCCTGG  
CCGAGATGGAAGAGCTCCACGGATGACTTCTGTTTCCAGGAGCGGCTTGCAGGCGTTGGGGTGCAGGCTTGC  
GGGCGTTGGGGTGCAGGCTTGCAGGCGTTGGGGT

>10 c11892\_g1

TTTTTTTTTTTTTTTTTTTTGCTAATAGACATCCATTTATTCATTAACCTCTGCAATTACAAGGACAGAATTG  
AAATCCCATCTTTCGCGATCTTACCGTTTCATTAAGGTTTTTCCCAAACACTAGTCCGTTTCGTAGTGGTCGT  
ATTTGTCAGTGGGCTAAAGAAGATCTAAAAGTCTTTTGTATCATCGTTTGGATGAACTTGAAGTGAAG  
CCATATCCTCTGGCTGAGGCTCGTCTTGTGGGCTCTTCTTCTTGGACCTCTTCTGTTGAAGCTCGTCTTGT  
TGAGGCTCTTCTTGTGAGGCTCAGCTCGTGGGCGAGACTCATCGATGGAAGCAACTCAACCACGCTATCA  
TCAGCAGGTGTTTCGATCTCAACAACGGCTTGTGATTGCTTCTTGAACATCGGCAACTACTGGCTTGGCG

GTGGTTACGGCAACCGGAGACGCAACACTAGCTCGGCTTGCAACTGCTTTGGTCGCGGCTTTGGCTTTTCT  
TTGTTGAATCCACGAGCTGAGGAACTGGACAGGATGTCGAAATTGGAGTTTTCGTTGCTGTTTTGATTGAT  
GTTGGTGTTCCTGTCGGTTTGCCTTGGCTAGTGACAACGCAGACGGCCAAAACGAGAGCAGAGAGAACG  
ACAAAAGTCTTCATGTTGATTGTTGGAATGAAAGGAGAGCTGATGCTTTGAGAAAGAAGCTTGAAAAGT  
ATCCCGGCTTG

>11 c7151\_g1

GTTGTATGCGGATTAACCTGAGTGAGCCGTTTATTATGCGATTCTTAATATCTAATTAACAGCATTGCAAAGG  
TAACTAAAATAGCAGCTTTATTTGGACGCGCTGTTGTAAGATTTTACGAGAATGACGTGAAACTAACACA  
ATAATTTTTAAAATTTTCTCAGTTAACGGCTAAGGAAAATCTTAGCAAGTGCATTCAATGTTGTCCAAAAG  
ATAGAGCCACAAAGCAATAGAACAATCGTGTTTCATCGTGATCAAATCCAGTCTAAGCCTTGGACTGGGGA  
TGAAAATATATCATTGTATAAAATGAACTTATTGCTTAGTACTTATTGCTTAATACTTCAAATGAGATTAAGTTG  
CTCGGCTTTTGGAAAGAGGGAGAAGTTTTGATAAACATCGTGCTTTCTTCTTTTCAACAACTCAAAGAAGT  
TTAGCGAGTGCCGTGAAAAGTGCAGTAGATAGAGCTCAGCTTTGTTCTGCTTTTCTGCAGTATAGACCAG  
TCCGGGTCTGGTTGTCTTATTTAATTAGGCTATAGAATCTCCCGTAAAAGAACTGAAGGTGAAGGCCGCTG  
TGAAGACTACCTTACACTCCTGCCATCACTATGAGACAATCGTGGTCTCTTCCGGTGGGTGCATGCACCTG  
GCAGATTGCAATATTGCTCGACATCCAGCCACTACAATGCAAACACTGTTGTTGTGATTAGAGGTATTAGA  
CGAAACATTTAAAAGAGACACCTGAAAGTTCTACAAAATTTCTGAAATAGTTCATGGTGTATCGGGAAGGGC  
CACATAAAATTAAGGCATTATAAACAAATAAAACAACACATTAGGTTACGTAAATTATTTGTAATATATTACA  
GCAAAGTTTTTCTCAGATGGACGGAAAATTTGTGTCGTCCTTTTCCAAATGCCGATCATCGAAATACTGAACCATCT  
ACTTCAGTCAAACATGTTTTGTTGTGAGTGGCAGCTAACATACAAGTCTGTAGGCAATAATTTACCCTGC  
AATTAGCAATGTAAAATTAGGTAAATGAAAACAAAGTAGTTGATGGTGATAATGGTTTTATTCAACAGCCCAA  
TAAGGAGGAGCATCTGCAAATATTATGTCGATCGACTTTAAGATATACTGGTACACATGTGCTCCAACTTC  
AGATGTTTTCTATCTTGATTCCAGTATGTATGGCAAGAACATTTAGGATTGTAGTTCCTTGTACATAAAAAAGA  
CTCCAAGGCCATCACCCACACGCAACAAGTTTGTATGATGCTTGGCCAACCTGTTAATGGATTCCACTTGCTC  
TTCCAAGAAGTGCTCCTCCAAATAGTTGGAAAGATGTGGGTGATTGTGACCACTGGCCACCTTGTGTAAATC  
CAGCAGACTCTGATTGACTTGTTTTTCTAGTTCAGAGCAAATTCATTGCAGCCAGAGGAGATGCCCATTC  
CTGCTGGGCAGGACGGTTGATGGCAGTCACTAATCTTCCACCACGGACATTTTGGTATTTTATCAGCTT  
CTGGGCATGCTCGTGTCTTCTTCTCAGCAGACTCTTTAAAGAACTTAGCGAAGCCTTTAAGGGCTACATCATCG  
CGATCATAATACGCAGCCAAAGCCAGGACTGATAATGGGCATTCAATATTGATTGCTTGTGATAGT  
TGCTTCCGACTCCTCATGGTAGTTGTGACGACCTTTACCCACCATTTTTGAAATTTGTAAAAATTTGGAATA  
CGTGACGACTCGAATGAGAAAAGTGAATTGGTGAAACTGCTTGTTCACACACTGGCGAAGCAAACAGA  
TGAATGACAGTAATGCCCTGCAGGCTGGCTTTATATGCCCTGTCCTCTCCCCGCATGTCGCCATAGCAACCAA  
TGGTAGTTTCTCTCACCAATTGTAGACGCCCTTGTGAGAAACGCCAACTCACGTTGCAATTCCTTGTGCG  
TTGTGGTTAGTAACATGTTAAAATTTGACATTTCCAATTTGTCTTTCTTTTTCATGAAAAAAGCGAGGCATTCA  
CTTTGCCCCAGAAAGCTGTTTGTGTTTTCTTTTTCTGTTGTCATGCCATGCCACCATTTAGCTGGTGATCTCACTT  
TCGCCAACACACACAACATAAATAAAACACACAACAATTTGGCGTTAAAATGTTTTATTGAGCTTAAATGTTG  
AATCGAGAAATTTAAATTAACCTTTGCTGTTTTCGGTATTTAAAATGTGTAGCGGATTTAATGAAACATATT  
TGTAAGAATTTAGTTCAATCCAAATTCGACAGACCTGTGCCTTTGCGTGCTGATTCATACAATTAGTAATCACG  
TGTCAGGGAGGATGCTTCTGTCATCAGGTTTTAAGATGCAAACGAAATCATGGAACCACGTAGAACGTTCT  
GACATGAATATCAGCTGTTGTTCTATCGACCCAAGTTATCATATTCAGGGCAGTCGTCGGGAAATTC  
ACCGTCATAGTGACCCGAAAAAATATTGGTCACGTGTTGGCCATAGTCCCGTAGGACGTTTTATTGCTCATCT  
TGGCTACAATTTTAGTTAAGCGTAAACGATTTTATAAATTCAGACTATACTTGTGTTGATTGAGTTACTAACTGA  
CATGTTGATGAAATGAAATCTGTCAACCACTGTTAGGTATACTGAAGTCGGTCTGCAATAAAGTTGGTAAT



TTTCAAAGTTGGTTATCCAAGTGCTGATTTCCGATTGGAACCTTCAACTTGGAAATTTGCCTTCCCTTTACTG  
CGAAAAGAATGGGCCGAATTTCCACACAATCCTAAGTAAGATGGATGGTCAAGACAACATGGTGCCTTTGT  
CTTGTTACATGTGAAACATTTTCATGACCACTAGCACTGATAGTACAGCTGCCTCAAGGCTGATAACGAATGGG  
TTGCAACACGAGCTGCAAAGCAGACTCAACACCCTTATCGTGGACATCCGATACACGATATCCAGCAAGCAA  
CTGTCCGATGCTGGCTTTCATGTACTTATTGGCTTGCTTCATAAATTGAGACTAGCTCTGGACTAGCTGTTT  
GCCACGGATTTCAAATATTTTTCT

>12 c19046\_g2

GAGCCGTAAGTTGCAGCCTTCGCCTTTGGTGAACCACGTAGCTAGATCCTTTCCGTAAGAGTCAGCTCCA  
TAGGTTGAGCCTTTGCCATACGATGTAGTGCCATAGTTGGTTCCCTTTGCCATAAGAATCAGTCTCGTAGGTTG  
AATCTTTTGCCTTTGGTGAAGCACCGTAAGTGGATCCGGTACCGTAAGAGTCAGCTCCATAAGAGACACCCT  
TTTTAGTGGATGGAGTGCCATAGTCGGATCCTGAGCCGTAAGAATCAGCACCGTAGGTCGAGTCTTTTGCCT  
TACCATAGTCGGGAACAGTGCCATAAGAATCATCCCCGTAGATCGAAGCCTTCGCCTTTGGTGCAGCTACGTA  
GCTAGATCCTTTACCATAAGAATCACCTCCATATGGGGAACCTTTTCCCTTTGACTGAGTGCATAACTGGTGC  
CTGAGCCGTAGGAGTCAGCGTCGTAAGTTGAGTCTTTTGCCTTTTGGAGAGTGCCATAGTTGGATCCTTGC  
CATAAGAATCAGTTCCGTATGATGAAGAGGAACCTTTTCCATTTGATGGAGTACCATAGTTGGATCCAGTGCC  
ATAAGAGTCATCGCCATAAGTCGAAGCTTTTCCATTGGATGA

>13 c16684\_g1

TTTTTTTTTTTTTTTTTTTTTGGATACTAAAATTGGTGTATTACGTCATGTCCAGAAACAGATTCATAAACAATCA  
AAATGAATCTCGCGTGGAACAGCCTTTTGATACTTATCAACCCTCATTGATCGAAGGCAGTTTAAAGTACACC  
TAGGCTGATTTTCAAAGCGAGATCGAGGCACAAGTTAATGAGCGATCCATCGCTAGAAACACAATTTTTCTT  
GGGGATTTGTCCGCAGGTGGCACCTGATTTCCGGATACGGTAGTCAACCCGTCCTTACTCGAACCAGGTTGC  
ACTGTGCAGCGTGCAAGTGCCTCCGTTCTCGAGAAGTTGTGCGAGAAGTGGGTGCAGTTGGAGTCGCGA  
GCGCAAATCTGCTGCAGGCTACCGGATCCAGGATGTTGACAATGATTTTGATTTGAGGCGGATGAAAATG  
CAAGCGTTGAGGGAAATTGCAGACGTGTGATGGGCAACGTGAGAGACGAAGTTCCCTGGCGGACGTTAG  
CGGTAGGACTTTTAAACAGTTTCCAATTCCTTTAGAAGAGATGTACCGTCGATAATTGGCACATCGGAGGAAG  
CTGCTGTATCCTCGTTGACCTCGGTAGACGGGACCTGCCTGCGCATAACGAGGATCGATCCGGTAATTGATGG  
GAATCCATTGATCTCATCCAGACTTGTGTGCGATCCAAATTCGCTGACGTAACCCGACGCCACGAGCAACAT  
CAAATAACGAGATTTTTCTATTTCCAAAAGGTAAGAATTATTCGTTAATAAAGGTAATTAGATAGAGTACCTG  
CATGTTGATAACGGGGAGTACTTGTGTCTGCTGCAAAGTCGACGATGAATGTGCGTCTCGTTGGTCCG  
GTGTTACCTTTATACCATCGGTAGTTGAACGGAATGAAATTATTCACGGCAATCGTTACCAATGTCTAAATG  
TCTCATGCAAGATGTCCCAACTCTTGCATTGCAATTTCTGACGCTCCAATGTCATATGGCAACCACGTTT  
CTGTTTTGGTTTTAGAATGCCATTCTATATTGTTAATTATTGTACCAATCCGGACTCTAATTAGCAAAGTGCTG  
TAACTGAAACAAATTTCCGAAATCTAGTGATCCAGCGCTTGTAAATCTTACGCAACAGACCACGCATGGAA  
AACCTGTAAAACACTGATTTTCTCGTAATTTGATTAGTTCAGTTCATCTATTTCCATTTCCAAAATGATAACAT  
AAAGTCTACTGGAACCAATTGATAATATAAAATACCTTTTCCAAATCTGTTTCCATACCTGTTATCTAAGTT  
TTCGGCTCCATCAAATATAAATGATATTGCATTTGACCTGCAATAGATATTGAAAATGTAGTAGTTCATTGCC  
ACTTCCATCACCTACCGATTGACGCCACATCAAACGCTCTTGGTTTTAAAGGCAAGTTTTTTCAGACGAGTTC  
GCCATCATCTTCGTCACCTGGATTGTCGATGGTTTCTTGGAGCTGAAGTAACGCCTTGACAAGCTCTCGTTGA  
TCCGCTTCGCGATTCTTCTGTTACTCGTCTGGTGAAAACACTGTCCATTTGCAGTCGAACAGCAGGTCTAA  
AGTTATTTCCAGCACGTTGTCCAGGTGTCCTTAATTTCCATAGAGTCTTGCCTTGGTCTACTAGATTTGATTTT  
CCTGTTGCGCTCCTGATCCTCTGGCGCGTAATCAGTAATTCTGATTGGGTACGTCGATAAAGCAGCAGTAA  
TGACGTAGAGGATGTCAGAAATCCACCCATGAGAAGCACATCTTTGGCGACAGGTTAGGGCAAGATTTTG

CTAAAAGAGTTAAGAAAGCTCCAGCACTGATCGAGGCAACTCCACCGATGAGAATGAGCGGTGTTAACAG  
GGTTGACAGGACCATCTGTTTGCTAGACATTTGGCGATTCTTCATGTAAATGACATGATCGAATCCCATCAAA  
CGAAAAAGGCCAATTCGCTTTTGAAGGTGTTGGCTTTTACCTTGCGGATGTCGCCGTCGATAAAGTCGAG  
CGCTGCCTCTTTACTTGTCAACCAAGTGGCATCGTAAATCGCTTGCCGGCCTTTCAAGAAATCCAAAATACAC  
TCGCGCTCATGCTCTTTTTCCGTGATTTCACTACTTTGTTTTGAGGACATCTTCGTCCATTTCTTCACGCG  
GACACCGCCACTGATGACGTAGGCGTCAATCAAGTCATCCAATATATCTCGATACGGTGTCAAAGGCAACAG  
GTTGATTGCTTCGAGGCGATTGCAATTGTTTTGCTTTCCAGCCACTGTCGTCTAACTATTTCCGACGAAAC  
TTGCTGCCACTAAACGCATGACAGGGTCTTCGTAAGCAGGGCAGTTTGGGTATTTAAATCTTTGGCCATTG  
TAGTTGGATGAGAGATTTCCGTCGTCGTCGATGATGCTTGCTTTATCAACTCTCCATAATCCTCGGCATTC  
GGCCGGGGTGATGTCAGCCTCACGTAAATCGTCGTCGTCGTCGTCGTCGTCGTCGTCGTCGTCGTCGTCGTC  
GAGTTTTACGACATCAACTTTGGCGATCTTGTGAAGTGAATTGCTCTCGATTTGGGTTTTTCTTACGATTAC  
CATAAAGCGTCTTTTCAACGTACTTTTTCGTCGAAAAAGAGTTTCTTTTCTGTCCGTTCTTGCCGTTAACATCA  
ATGGGATTGTAGATGACGTAATCTTTGTCATCAAAGGGAAATGTTTTGGCCTGCTCGCGGTTAAGTTGAAT  
GTGTCAACGTTGCACTCATCCACGGCGACGAAATCCGGTTGTTGTACAAAGCTCCGGTTTCAACTAATTC  
GCCAGAACGACTCCCTCGTACAAGGAATTATATTGTCTTCTCAAATTTCTTTTTCATTTCTGTTCAATTGCT  
TCTTCGATAGCCTCTTTGCTTAGGGCTTTTCCACCGCTTGCGTGAAGTGAATTTTCAAGGTCGATGCACAGA  
CACCAAAGGCATTTGCTACTCGTTCAATCGCCAGTTCTCGATTTGATTTGGCATTGTTGTCGAAGGAAGTGG  
AAATGAAGCTCGGTATGGTGTGCTGGCGTCGTTTCATCTGATGGCTAATACATTTGGACTCGCCCTCCAACAACA  
CTTGAAGTATTTCTCCACCATTTCCGGTGGAATTGTCATTGACTCTTTGGTGTTTTGTCTTTTCTCGAAAA  
CTTTAAAGTTTTGTGTTGCGCTTCAATCCATTTTACAAAGTTGGTTAGATTTTTTTCGAAAAATTGCTTGACT  
TTTGGCAACTGCTGCTGCTTCAAGTCTTCGATGGAGCAATCGGTGCCAGCAATGAACGGACCGAGCC  
AAGGAAATACTGAAACAAATTAATCACGTTCTCCTTTTGTGCGCATAGCCGTCGACAACACAAAACAAAGG  
CGGCTGATCAGTTTTTCTGCCATCTTTTGGACGATGAAAAATGCAAGTTGATGTGCTCGCTCAACACGTT  
TTCACACGTACGCAATACTTTGATGAATTCATTTTTGTTTGTTCGATGTTTTCTTTAGAAAGCAATGCGC  
GATAGTAGTAGGCGGCCGATAAAAAATGATGGTCCTTCGATTGGATGAGTTGTTCCAAAATTCGACTGCCT  
TTGGGAGGTCCGGCTTTTATGACGCGTAGCCAAATGTCTGGCAACAACAATAAGCGGGCTGGTGTCAATC  
CACTCGACTTGCTGATACCAATGCTTGTCTGACGGCTTCAATTTTGGGATGAATTTTCTGAATATGA  
ATATTTGTACATCTAACGGCAAATGTTTCATTTGTCAGCCACAAAGCCCACTGATCCAACACGCTGCCA  
CAGATGGCACTCACTATCTGATCACCGTCATTTTTCTTGCGCCGTTCTTCTTTGAGGTTGGTATAATTTGGA  
AAACGGATCAATTAATTCATCTGATCTTTTATAAACTTAAATCTTCTTCATCCGAGCGATGCGTTGTTTCTC  
TCGAATTCGCGCTCATTTCATTTCTATCGGTTCCCTTTGTCAGGCGGCCAACGTTCCGGACGAAGTTG  
GTTTGCATACAATGAGGATTCCACTTCCAGGTGCTCCACTGCGAGCTGCACGACCCATCGCCTGTTCTCTAT  
TCGTTGTTTTTCCGGGAAATAGCTGAGACACACATGCAGTCCCTCATTTTCGCGTAGTTTTTGGCTGATTTG  
ATGTCCGTTCTCGTCCAGCCAAGTTGGTTGCAACGATAACATGTTCAATGTCCAGTTCTGTTCTTTGAAATG  
CAAATTTACATAATCGCGCGTGTAGCGATGAAGCCGGTTTTTCTTAAACCAGATCAGGAATCGAGTTCACTAA  
GCGTTGATGGACGAGATTGACATTTTGTGACATACAAAAATGATGATTGAACGTTCTTCTTTCATAATA  
GTTTTGGTTTCAATGATGATGGCATCTAGCCATTCATTTTCGGTTCGACAGGACTTGAGTTGGTTTTTGTCAA  
AAAGTTTAGGTATGTGCGTATGATTGTAGTGAAAGTGGACTCGAAAGTATCCTGTAAAAAATGTTTTTCTTG  
TTCGGATCCCAGCGTTCCCGAAAGACCATAAATGTTAGGATATTGATTGATGTACGTGGCATTGAAATGAAA  
ACAGCTTTGAGACTTTGACGCGTCAATTTACATCCTTCTTCAGCTGGACGAAGTGGTGAAGGCTTCGTCC  
CATTGCGACAAAGTTGATCCGTTCCAGTATCGGGATCGATAATAACTTTCGCGATTGAGATCCGGACTGG  
TGTCTGTTGATCTTGTCAATGACGTAGTCTCGTCCGGTTCGATCCAGTGCCAGAAAAGCGCTATCCAG  
CCAAGTGTCCAAGTGTGCGTCAACAAAGTCGAGTAGATGGGACAGGATTCGAATTTGACGTTGGCGATTAG  
CCACTTGGCGTAAATAGAAAAACCAATTTGGCATTGAGATTTGTTTCTTTTCCGATTCTTAGGTGTATAGTTG

ATTTTGTCTTCAGTTATTTCGGTTGGTATCGGCAATTAGTAGACGTCCTTTATCGTCAATTACTTTTTCTTAATC  
AGATGATTCCACAGCTCATCTTTTTCAAATCGTTAATGGCGCGTGAACATAATTTCAAATCGTCTTCAGTTAT  
GACACCGTATAGGTCGTACAATACGCGAGATTTAATTGATTCCTTCACTTGTTTTCGATAGTCCGGGATGTCCT  
TATTAATGCGAGACTTGCATATTTATCCCAAATGAAAACGTACAAAGATTCCAAAGTCTCCATGCCGGGAAT  
GCCGTGTGATAAGTAGAGGGTGTGTTGCCACGATCCAGCAACATGCAATCCACTTCGTCAATAATGACATG  
CTGGAATCTTCGATTGCCACGACTGTCGCTGCCGTAGAAATTTGTCCAACAAATAATCACGTTGAAAATTGGCC  
AATTCTCCATACACCACAGCTGAATCGTAGGCTTTTGTGCGCTCCTCTATTGAATGGCTGCAATTGTTGGCCA  
CGCTAACGTTGAAGAATTCATAGATGTCTTTCAGCCCTCCCTTGTCGACGACAGGGTGGAAATCCCGTAGGG  
CTAGCACGCTGTTGCTTGAATGACGTCGATTTGAGAGAAGGACTTAGACTTTTGCTTCTCTGAAAGTGCAA  
ATGCGATGGCCACTCCAGCAACAATTAATGACTTGCCCTCGCCAGTTGACACTTGAACCAAAGCATTGTGAG  
AATTCGGGTGTTTTCGCAATAATGTTAGGATCGCTACTCTTTGGGTATCACGCAAAGGAAATCCTAGTTGCTC  
TTGTACAGCGAAATTGTAGACGTGGAGGAAGTTTCTAGCTGACCATCACTTGTTAGATCTAATCCATTTGTT  
GACCACATTTCTTTGATCAGTGTAGCTATTCTATCGAATCTCGCCGACGCTCGCCGCCCTTGAATTAATCTCG  
TTGCGACAGTATGGCATCGTTAAGATCCATTTTTTTGGAAGCTCTGAACAATTTCTTTATGCGGCTCAGAAAG  
ATATGTTCCGAAGCTCCTTTCGAAATTTGAAGCTCTCGCATCAAATCGCTGATTATATAGTCGACGTTTCTCTCT  
TCAGGCGTTTGGCTTGGGTCAATTGGAGAGTTAATGTCGAGGCCACGCTTTCGCGTCCAGTTACAACCTGC  
TGTTGGTAAGCCAGTAACGGGGAAGAGTCTAGATCATCAGTTTGAATTGCACTTGATAGGCTGGCTTACC  
ATTTTGTAGTTTATTGTCCATTTGAAATGTTGGCTTCTAAAAGCTGCTGCCGGAATCGGATTTCAATGCT  
TTCAACTGTTTTCGCCAAAAGCTTCCGTCCTGTTAATCGGATGTGATTGTAATGAGCTCGAAAGTATCGTTGG  
AGAGTTTGGAAACATTTCTTTGCGTTGGTTTATCTGCGAAAGATGATGGTAGAGATTTTGGCGCAGGATAGCC  
TTCTTCTTAACAGCTTCGACCAGCCTTTTAGTTTCAGGAACACCCTTTTTGATCTCTATCGATGTATACCTCTC  
AAAGGGTTTCTCCGTTTTGACTTGTGTTGGCACACGAATTTTCGCTTCTGTTGGTTTCTGGCTAAAGTTCA  
ACTCCAATCTAGCATCGTTTTCAAAGCCGAAATAATTTCTTCCACATTCGTGCCGAGTTGTCGCTGTTGAC  
GCTGTGAATGAAACCAATGTCACCGGCAGGTTTACCAGTTTACCATCAGAACCGGAGGCTTGATAGACATC  
AGACATTCGCGTGGCGTATGGTATGCGCTTCTGAAACCCGATAAATGGAAGGCTAGGCTGGACAAATGGGG  
ATCTGTTCAAATCTCCAAGTACAGTACCACCGTATCCACCTTGCCGACTCCTAGCCCTTGAAAAATATT  
AGCGTATGCCTTTTCTTTCTGTTTTGTAATGATAACCAGGAGTTGCTGGACATCTCCATAAATCTTCGAT  
TGTGAAGTTAGTTGTTTCGAGAAGTCCCGATATACGCTCGCCCGCAAAGATTTTGCAATTTGGTAGCGAT  
GATTTCTTATTTTGGTCGCCAGTGTGCCTAATAATGACATGGACGGAAAAGCTTTTCTAAAAGCTGCTCTA  
GTCCATTTGTGAGCAGCACTTCCGTCGCCTCCGTCAGATATGATGGTCCATTGATTTGCGTTGATCACCTCGTT  
GCAACAAGGTGTACATTGCCACCACTTTCACCTGGTTGGCGTGGTTCTCTGCTTTTTGATGAGTCATGTGT  
TGACCAGACAGTTCCACGATACTTACAGTCTACAATGATCTTGTGATGATGACGCCTACGTTGATACCGT  
GCCAGATTTCAATTTCCAAGTCGCAATCAACGTGAAGAGACATAATCCAACAATTTGAATTTCTTGACGTT  
GTTGCTTTCAATTCATCATTTTCGCCATAATTTGCTGAGAAATACAACATTTCTTGATAGAAAATGATTTT  
CCTTCCGTCCTCGTTCTGACTAGTACCTCTATTTAGGCAGCAGGATTTCTTGAAAATCTCTATCACCAGTG  
ATGTGAATTTCCGCGTCCAATCATCATCAGCTATTTAGCGGCTGCTAGTTTAAAGTATTGGATCACACTCTCT  
TCGTTGCAGTCGGTCGGGAAATGTTTCGCAAATCATCTTGATGCATGCCGGCGGATCTGAAGCACATTTTCG  
GAAACGCTCTCCTCATAAAGTCTGGAATCCTTGCACTCCATGACATTCGCCAGGAAGTTGTTAATGCG  
GAAAGGAAGTTTCTGATTTCTCGCCATTGGTTTTGTTATTACGACGATGTTCCAGCACCGAGAGAAAAGC  
TCGTTGATGCAAAAGATCTTGAAGTGAATGAAAAGCAGGGAAACGAGAATGGTAAAACGATGTGTGCTTT  
AAACAGCTCTCCTGTTTACGATCAACTGAAGATACTTGACCCTCCATCACCAAATTCGAAGTCGTGAT  
CCATGTACTTCTAGTTTTGTATCAATTTCTTGAACGAATTGACAGAATTCATTCACTTAGGAGAGTAGATAG  
TTCCATGGCAACGTCAGTCGCTGGGTTCTCCAGATTGTCAAACATTTTTCTCAATGTCTTTATGCCACATCT  
CCAACACGATTTTCACATACTGCCATTCGAGACACGTCCTTTTCGAGAGACGAAAGCTGACGTTCCAATTCG

ATTCGATATGACTTATAGCATTGGGGAAAAGCTTCAGATCGATGTCTTCATTATTTAACTGAATCCAACCTTGA  
ATTTCTTTGGCAACATCTTCTGTGTCCTATATTTCTGCTCCGGTTTTTTTCGGCCGGGTGTGACTTTGTCCAAC  
TGCGATCGCTCCATCCTCATCCATGTTGACAGGTTTTCTTATAACACAGTGAATAGATGCACAGTAGTTTGTGA  
ACTTCTAACTGATTTCAACGATCTTGACGTCTATGACAAAATTTCTCTAGGTTTCCCCTGCACACACGTAGTA  
CGCACCGAAATCGGTGAGCGCCAACAAGACGGTGACATCTACAGGACAGGATGTCATAAATCCGCTTGCGT  
CATTGGGTTTTCCACTTCTAGAATTCGGCGTAAATAAGATGTCGCAACGCTACACCACACATTATCATTGAGA  
CTGTGTCATCGTAAAACAGTTTAGGCAACTCAAGACGTTGATGTTCAAGTCTGAATGCAGAATTTGTTCTGT  
AAGAAAATGTGCTGTTCCAGCTGGGCATGCAACAGCCTCCCTTTGCTCTGCTGGTCTGCTCTAGCTGAGA  
TAACACCGAACTGAAAATGAAAGGCTACGTCATCTAGCGCGTTTTGTTATAGCGGCCCGAGGCTTCAACAC  
AAACACAACCTTTTACGACTTTGACGCAGCTGGCCTGCAATAAAAAAGAGTCCGTGTTGGCAAACCTGGTATTC  
CCTAGCAACAGCTGCGAATTTCTGTACTGGATGTTGAATTAGATAATAGGCTGAAGATGCTTGACGGCCTTAC  
CGAAAGACGAGCGAAGATCACGTCCACAACAGCCATCTATCGTACAACCTGAGCAATGCTATAGCATTAAAGG  
GTTGGATGAGATGTCACACCTTGGCACATCAAAGGCCTAGCAGAGGATAAGTTGATTCTATTGGTATTCCGGG  
GGCTGTAGCTCACGTTCTGCTAAAAAGCCGGAACGATTATTTAAAAAGAAAAATTAGCTTCAAAGTTAAGG  
TCTTGCGACAGAAGAAGAGTATACGTCTGTTCCGTAAGATTTTCATCCAGTAAAAGAACATGGCTCCTGTTG  
AGAAAGTGTTCAAATTCATGTCCAGTCTCACTCTAGTGTAATAATCCTGCATAGGACGACAGTTGGACATTT  
TTCAACTCACCAGGTTTTAGGCGGAAAAAGATCAATCCGTTACCTTCGCCTGCGAGGTGATTGACAATGA  
AACAATTTATGACTAAAGGATGATGAATCAATGAAATGAAATTCGATAATTCTTTTACCACATGTGATTCCGC  
CTACCAATGTCACGAATGTACCAAACCTGAGTTGATGTTGCTAGTCCTTAAGGTGCTTCAATTATACCCAAAACC  
ATGGAAATCCTCATCACACCAAACATTTGCGGTCAAGTGAATAGTGGGTGTTCCGGCAATGCGCCGTGCCTAAA  
TGATGGTACAATCGGCCATACCTTTCTTATCTTGCTCAGCTGGTTCATCGATCACAGGTGGGTAGGCAATACTC  
CATCTTCCATCATATCTTTCAGCATGGAGATGACAATAATCCAAGAGGGCACTAATCTGCCTTAACATCCTTCA  
ACTAGCTTTGCTTGAACGTGTAAGCAATTAACCTCGTTCAAATACAGTTGATCAACATACTCAATTCTGATATTA  
CACCGATACACCAGGTATTCAGTTCGTACAAGTCTATAAAATGCGATGGATTTTCCCTGGAAGAACACTGT  
CTGATGAGACTCTCGCGCAAGTAAGAAGTCAATGTCAGCTAACAAATGGCTCGTTTTCTGCAATTCAATATG  
GTGTTTTGGTACTGATATTTTCGACATATGTAGTAGCCAGTCTAACTGTAGATATGCAACTGGAGCAACTGAG  
AAATAATTACATGAAACTGGAGCAAGTTTTGGCTGCAAAGGAGAGCCGGTTAGAATTTCTGGAACAAAAGG  
TTCAACAGCATGGAAATTTAGAAGCTCAAATTACAGACTTGTGAATGAAATGAATCAAATGAAGACTCAGG  
TAAAGCGGACAGCCGAGCTGGAGCTCAAAGTCCAACGACAGGAATCCCTTCTAAACGCCGTGCAAAGCGA  
AAGTGAAGCCATAACAACGTTAGCCTTAGACAGGGAACAGCACAAATGCCCAAATCCTGCGCAGACCTAA  
AGAACAATGGCCACACCTCAAACGGAATGTTTTAATTATGGGAGTGAAAATGGTGGAAACTGTTTTCTGTG  
ATTTTTCGAAACCTGTAACCGATCCAAGCTTCCAGAAATGGATCGGTTTTGCTGATGTTAAATCCTCTCCAGT  
CTACTTCCATGCCAGAGAATAGGAAACTATGGGGCTGCCAATACTGCCATCCCATTCAATCAAATAAGGTTG  
AATGTTGGGGGTGCCTTGAATCCTGCCACTGGAGTTCCTTGCTCCAAAATCGGGGAGATATATTTCTCT  
TCTCAGGCCTGAGTTGGGATAGTAATGCTAAAGTTCAGTTGCAAATGAAAAGTGAACCTGGTGATTGGTCCA  
AAATTGGAGAAGCTCACTGCACACCATACAATACTTTTGCCTACAATCAAGTCTAGAATAAGAAAGGAG  
ATGAAATCAGAATAATCCACATTCACGGAGTCCACGACAGAGATGGCAACAACCTTAGCAACTTTGTTG  
GCTTACTCCTAGAAGAGGATGTTTTGGATGTTAAACAAGCTTGCAAATGATTATTGGAGGACTGTACGCTACC  
CAGTGGCAAGATAGGAGTATATATGCCTATACTGCCTTACCATGCCAGTGGTTCATGCGATCATGTTAGCA  
ATGTGGAATTAATTTTTTTTTTTAAGTTTTTCATCTATGCATTTAATCTACTGTCTATTCTTTGAAGTTAATGG  
AACACGGGAGGGGGGAATAAACGAATGCGGGGACCTTAAAGCTAATTTGTCATTCTTTGAAGAATTCAGGC  
TAATCTTTAACAATATGGCCAACAACCAACCTGTTCTATTGAAAATGCAATTGACACAATGGCGGGAAAACCTC  
TCCAGAAACTCAGGAACTTTTGCGTTTGATCAGCGAATGCCAGTTAGAAACCAGGACCTCCCAATTATCAT  
CCTAATAACAACCTGAACTTCTAGTTC

>14 c21753\_g2

GGTGCATGGAGGATCAGTTGTTCAACTCGTCATCCCCAAGACAACATCATGAAACTGTTCTGTCGTCGCCGCT  
CTTTTGGCCGTTGCTGCCGCCGCTCCTTCCAGCTACGAGCCGGCCTACAAAGCCCCTGCTCCCTATGGCGCT  
CCTAGCTACAAGGATAACAAGTACGCCGACATCACCGTCACCAGCCAATCGGACGAACGCAACATCGATGG  
CAGCGGTGCATGGAGCTACGCCAGTCTGACTACACCACCCGCGATGAGTCCTACGCCCAGAAGAAATTCC  
AAGGCAAAACCTACGACTCTTACGGCAAAGAATCCTACGGCGAAGTCCAGGGACACACCAACAAGGGATC  
CTCTTACTGGGTTTCCCCTGAAGGCCAGAAGTTCACTTTGACATGGGTTGCTGATGATGCTGGATTCCAGCC  
CAAGGGTGACCACTTGCCCGTCCCTCCCGTCCACGTCTACGAGCTCCAGTCGCTCCCGTCCATGAATACGA  
ACTCCCCGTTGCCCCGTCATGAATACGAACTCCCCGTTGCCCCGTCACATCCCCTTCAACGGCAAAGGC  
TTCAAGATCTACTAGATCCTTCTTAAACTGATTAATATATAATATAAATGATTTCTATACGTTATCTTTC  
CCGGCATAACATTGAATGTGTTGTTGTAATATATACAGTAGATGCAAAAGCAAAAAAAAAAAAAAAAAAAAA  
AAAAA

>15 c22095\_g1

TTCGTGCCATTTGTATTCAATAAATTTGGACTTGAAAAGATTTTTTTCAGAATAAATTTCTTTTGACATGTCCA  
TATCATATTTAACTGTTTGATGATTCTGTTTGTAAAACCTCAATCGAGGTTTGAACCCAAGACCATTGAATCCG  
TACTCCAATACTCTACCACAGAGCTATGATACTTGACTAGTTCAGGAAATTTGTTATATGTATATTTTTTCCCC  
ATTAAAAATTTAAAACCTACACCCTAATTATTTGAAAAAAAAAATTAGAGAACGTTAATGTGCGGAATGAGTT  
CAAACAAACACAAATCGATTTGCGCATTACTGAGACCTGCGGAGAGCAATGTCGCAAGCTGCAAACCATCT  
TTCCAGGCTTTTCTGGCTTCAGTAGAAAACGACTGTCCAAGTTCTTCTTCCATGACACTGAACATGACTTCAC  
CAAATAATTTAAGCTCGTCGGGTTTACGCTTTTGAAGGCGGGAGAATTGAGGTAAGGGCAGCTTTTCGGG  
TTTTTGCTAGGTTGTCAATGTAAGCATTGAGGCCGCAAGCAGGTATAGACTTGATTCAAGAAGTGACTG  
TTGGTGGGCAAATCAGCCAGATCGACGTCGCAAAGGCTGCAAACCTCTTTTGGGTTTTCGGGTTTTCAGTTT  
GAAGTAACGGATGAATGCTTTCGGGGCAATGTTTCCATTTTTCTTGGCGACTTTCCAGGTGGCCTTGATCAA  
AGCACGATCTCCTTCCATCGAGTATTACGCTGTTTTCAGGCTTGCGGTGTGATGGCCGTAGGGACATTT  
GACGCCCTGCTGACTGTATGGACATTTAGCTCCTTTTCTCATATACGGGCATTTTGATCCAACCTTGGAGTGAT  
AGTGACCGGAAGATGGTTTTTGGATTCCGAGAGGACAGCCGCTGGCGGATTTCTTGAAGCCATGAGGGCA  
ACCACTAGCTGAAGCATCCTTACGCGTGTATCCGTAAGGACATTTGCTTCCGATAACATTTGTTTCTTAATTC  
CAAATGGGCAACCATGTCAGAACCTGAAGACACGAAACCTAATGGGCATTTGCCATCGGTTGATTGAGCG  
ACCGAGAATCCGAAGGGGCATTTTCGAGCCTTCGACCAATCCTCGCTTGAAGCCGAATGGACATCCACCAGC  
ATTTTTCTGAATCCGTAAGGACAACCGGAAGCAGCAGCAGCTTCTCTAGTGATCCATAGGGGCATGGGGT  
TCCTTCCACTGAGCGTTTCTTGAAGTCCAAGAGGGCATCCTTTTCCGGAAGCAGTTCTTGAAGCCTAGCG  
GGCATTTCATCGGTGGCTGCCTCTCTCGTGAACCAAAGGGACACTTTGAACCTTCCACTAGTCCTTTCTG  
TAGTCCAGTTGATGTGGGTTAATTGATTAATATTTTGAAGTAACACAATCAAATGAAAACGAGAGAATGG  
TGAAACAGAATGCTTTACCTTTACACCAAGTGGGCATCCAGAATCAGATTTCTTGAATTTGAGGGGACATCC  
AGGTTTGATTGCCGATGCAGAATAACCAAACGGACACCGTGTGCCTTCCGCTGAAGATTGCTTGAAGCCAA  
ATGGGCATGGTTCCCCAGATCCGGTCTTGTGAATCCGTAAGGGCAGTTTCCGTCATTGAATCCAGATTTCCG  
GGTATCCGTAGGGACATCTGCTTTTGTCTTGTAGCTGATTGATTTTCGAGTGCTGTATGGGCATTTATGGGC  
AGCAGCAGTTGGTTTGTGAAGCCGTAAGGACAACCAAGATCAGATTTCTTGAAGCCATGCGGACATCCGT  
TAGTTGCAACATCACTAGAGCCATATCCGTAGGGGCATTTGCTTCCGGCAACCATTTGTTTCTCAGACCGAA  
GGGGCAGCCGTTACCGGAACAGTTGGCTTGTATCCAAAAGGGCATTTGCCGTCATTAGCCGCTTCAAAG  
TTCCGCCGTAAGGGCATTTGCATCCAGCAACGAGTCCTTTCTTGAATTTGGGCATCCGGAACGCCTTT  
CTTAAAGTTATGGGACAACCTGGCGCAGCTGCATCTTCTCTGGTGTATCAAACGGGCACTGAGATCCTTC  
AACCAATTGACGCTTAAAGCCTAAGGGACAACCTTTCCAGTTGCGACTCCAGAAAATCCGGCAGGGCATT

TTCCATCACCGATGGATTCTTTCTTGTAGCCATAGGGGCATTTAGATCCTTCGACGAGTCCTTTCTAACACCT  
AGGGGGCATCCTTTGTGAGATTCTTAAAACCATAAGGGCAGCCTGGTTTTGAAGCCAATGCATTGTCATATC  
CGAATGGGCATTTTGTCCCGCAACGGTAGATTGCTTAAAACCCCATGGACATCCAGCACCAGAGGCCGTTT  
TCTTAAATCCGTGGGGACACACTCCGTCGTTGAAACCAGATTCGGATATCCATATGGGCATTTGCTGATTTT  
CGATCGAATACCGGAAGATTCATGTAGCCGTAAGGGCATTGGTGACTGGAACAGCAGCTTTGTTGAATCC  
ATAAGGACATCCAGCACCATTAGCAGATTCTTGAAACCGTGCGGGCAACCTTCAGCGATAGCCTTGCTGAA  
TCCATATGGGCATTTAGTGCCAGCAATTTGTTGTTTTTAAATCAAATGGACATCCTTTTCCGGAACCGCTAG  
CCTTAAAACCTAATGGACATACGCCGCTTCAGCAGCCTCTCTAGTTCCGCCGTAAGGACACTTGGATCCTGC  
AACCAGTCCTTTCTTGATACCAAGCGGGCATCCTGTGGCATTTTTCTTGAAACCGAATGGGCAGCCAGTTGT  
AATTGCATCAAGAGCAGTGTATCCGAAGGGCAGTTAGATCCGTCCACTTGATTGCGCTTGAAGCCCATTGG  
GCATCCTTTTCCAGTAGAAAACCTCCGGAGAAAACCAGCTGGGCATTTTCCATCTCCAATCGCCTTTTCTGTAT  
CCGTAAGGGCATTGGATCCTTCAACTTCTGTTTCTTGATGCCGAGAGGGCAACCTTGGCTTGATTTCTCG  
AAGTTGTAAGGGCATCCGGATTCGATGCAAAGTCCTTGGTGTATCCAAACGGACATTTAGTTCCGCTTACC  
GCTAACTTATTGAATCCCATGGGCATCCACTTCCAGGATCGTTATTCTGAAGCCGTGAGGACATTGTCCAT  
CATTGAATCCCGATTCGGATATCCGTAAGGGCACTTGCTCAGACTTCTGGAACCAACGGATTCGAATATCC  
GTAAGGGCATCCTGCACCCTTTCAACTCTCCAATGGCACCCTGGCCATGATGAGGATTAGCCCCGAAACG  
ATGACTGTAGGGGCAATTATGGGCGTTGACAATCGCTGCCAGGCAGACAGCAATCAAATGAGAATTTTCG  
TAATGCTCGTCATGGCGCTCATTCAAATTACTTTTCAAAAAATTGGACTTCCAATTCGTGCTTGGATGGTC  
GCTTGTAGCCGGACCAATATCTGAAGCTCCACATCTTCGCTTCGCTTTATATACCCTTGCACAGTCGAAACTG  
CATTCCACATCATCTTCGGCGGCCAATCTAAAAATCGATCGGGTCAATGTTTTTTTTCCCTCAAGTTCTCC  
AGTATCCTGTTGAGTCGTTATTCGCTAGAGGCTTCGGATGGATGTTTGTCTAAAGCAACTGATAAAAACTCA  
TGGTACGCCTCTTTTTCTTGTTGATTTCTTCCAAATGTTTTGAGAGGATGTACCAAGGCAAGGATCGTTT  
TCTTACGACGCACATTTCTTTTTCCATTAATTGATGAGACAATTTTCGGATCGCGATGGATTCTCCGTTGGTTG  
TTCTCGAAAGGCGTAGATCAACGTTATCGCGCAAAGTTTATCTCGTCCTTGCCAGTTAAGTTTCGTCAGAA  
CAGCTGCTGTCTCTTAAACCTAAATGGAACCTTGAGCTATTTCTTAACTTCAAAAACAAACAAAATATAGTTTT  
TATTTTGTAGAGGAAGACGAAAAAAGTGGCGTAACAAGCACGACGTCACATGCAGTAAATGCGTCTTAGA  
AATATAGATCAATGAGTGCTCTAAACTAATAAGTTAGCTCAGAAGTTTCCAAGGCATATTATAATTTAAAAGA  
ATTATTTCAAGGAAAATTAAGCTGTTCCCATGGAATAAACAGCTATGAAATGATTGAGCAAAATGAACTC  
CCATGACTTCGTTGATGCTTCAGCGATACGTACATTTGCTATCTTATGTTTTAGGCAAAGGATAAAGGT  
CACGGGAAGATAAATAACGAAATTAATCTAACAGAGAAGTGTCTCGTTGATTTTGTAGAGAAGGAGGCA  
GCATTTCAATGACCATATTAACGAGCTTATATAACACCAAATGGAAAATTTATGGTCCTTGATTTAGCCCTGAC  
ATTCAGATATTTGCTGATGTTTCCAGGGTAGGATAGGACATTTGATTTTACTCAATTTAAGTCTAAGATTGAC  
CCAGGAGAAGCCAATCCCTTTCCATTGAGTGATTGAACTATGACGATATGAAAGCCCAACTTTTTGTTTGA  
CAGCCTCATCGGCTAACAAATATGCCTTAGATTAGGACGCCACATAAAAAACAAAGCGAAGGGCTAAGAACC  
GAATTTAGCCCAACGTTCTCATTAACTTAAGGTGAATGCTAAATTTCTAACACTAGAGCACTAAATACATTA  
CGTAGGTTGCCAGAGGCCATAAACGGACAACCAGCACAAAATGTGAGATCAATTACATTTCTCTTTTCATA  
TATTGAATGAATTCGGTTGTAATGCAGTTGATTTAAGATGATATTTCTCATATTAAGGAGGATGTACACATCAC  
AAGTACACCCTTTGACTATGAGAAGCCATTTTACCGTAAGAAAGATTTGGTTTTCTATGGATTTGAACCTAC  
GACTTTCCGCCGCGCCACGCCAATGTGATAACCACAATACCGTGACTCTTCATATATACGCCGTGCAATGCTTG  
AAGTCATCAATAAGAATGAATGCCACCTTCCCAATTAATGACTTGGTTTTTATTCTAGCTCTAAAGAAGCTT  
CTCCTCCTGTTCTTTGGCGTTGGCATGGCAACAGACATGACCAAACAGGTATCCATCTGGCGCGTCAGCTT  
GAACGCTTCTCCAGATGGAATGAGAAGGCTGTGTCGCTTTTGAAGATGACTTCTTTGTTATTTACAGTAACC  
GAAGATTCTCCTTCAATTGCCACAACCATGTTTCATAGCTAGAGGCTTGAAGTCATCGCTTCTTTGCCAT  
AAACAACAACGTCCGATTGATAATTGATGTTGCCAAACAGCTTCTTTTTGCCTTCTTTGTGGATTCATCTCG

GTGTAATGCGAGCCAGTCTTTCAAATCGAAAGGGTTTTCCACCTCTCGGTTGGAATCTGGTTTGTACGGTGG  
ATTCTCCGGAATAGTTCCCGAATAGGACGACCTGTTCCGGCATTGCTCGGATGCGAAAAATTCTTTGATGAC  
GGGCACTAATTGCACACCTAGATCATCGCAATAGAACCCTTTTTCAAATAGCCCTTCGGTTGAGTCTGTTACACA  
AAATATCTCAGGCAGTCTAGTTCATGTGTAGCTCTTTCTTTCAATGACTAGTCCAATGGTATCTCTTTCTT  
TGAGGGGAATGTGGAATTTTTCCAGGCAATAGAAATACCTCACCTTCTCGAATGGGGACTGTTTTAACTTC  
CCTTTTTCCAGTATAATCAACTCCATTGCTCCCTTTTTCATGTAGAATAATCCTCACCTTCTCCAGGTGGAAA  
TCCTTGCGTTGGTTGGGTCCCCAACAAGAAAACCTTTCAATTGCTGTTTCATGCATGAGTTTGTGCAAACA  
GGTGGCAAAAACGAGGCTTTGTTTTCTCGATCCACTGATTAATGTTATAAAAACCTGGGCCGCCATTTTCGTCT  
GTAATATTCGTGCACCTCACTCGACGTACAGCTCTCGAGACGAGACTGACACAAAAACATATTTGCTTTGCCG  
AAATAGCGACCCTGAAATGTTTTACCGTCACAAACAGTCCCACCGCTCAAGGTTAAAAGGAGAAAATCTC  
AGAGAACAATCGCCTTAGGTCTTGATCGCCATCTCTCAAAGTATGCTTTCAAATTTGGCGTTGCGAGGCC  
ACGTGTACACAAAAGGCGAACAGAAATGGAATGCAATTTCAATAGCTCAGCAGCAACGTTTTGGCTCTTGA  
GAAAGGAACTTAATTAC

>16 c18106\_g2

TTTTTTTTTTTTTTTTTTTTCTATAATTTGTTGCTTTTATTTGAAAACCTCTACTACCATATATTGCAATATTCCTC  
ATCAAGAAAACAAGAAAGTTGTGTCGCTGGTTTCGATTGTCGATTGCCAAAGTCCATGTCGTAATTGCCAAG  
ATTTAATTTTTCTTGACGGTGATTTCTTGGAAGTTTGCTTTTCTGTTCTTAAGAATTGCTGCAAAGATGC  
GAAAGCGGAACTGAAATCAAAGTTGGAGTTTTCGTTGTTGTTGGAGTTGAAATAAAATTGCTGGAGCGGC  
GTGGTAGAAAGCTTTTGGCATTACCCATAGCTTTTTCGAGGATTGGCTTGACAGTCTCGTCAGCAGCAGTTT  
TCTTAACGGCTTTTGTGATTGGCACGAACATTAGCTTTAATGACTTTCCAGAAGCAAGAATCATCATCGTC  
GTTCTCACACAGATCTTGGTCTGAGTCTGGATGTTGGCAAGCAGTTCAGAAATAAGTGAAGCTGAAGAGAA  
AATTGCTGTTTTGGTTGTCGTTCTCGTTGATGTTGATGTTAGTCTGTGATGACGGACGACCCATCATCGATCGT  
TGAGACATCATTTTAGCAATGGGGAGCGTAGTAGCATCGATGGCTGATGCCATGCAAACCTAGAACGATGATA  
GCTGCTGATGCCGTGA

>17 c22854\_g1 Peroxidasin [Zootermopsis nevadensis] 0.0 58% EFX83452.1 +3

GCCTTGACAGTGTGAAATAAGACGCCAAACGACGTTGAATGGTGTCCGTGACGCACTCGACTTGTCTCAACT  
TCTTCAAACAGTCTCATTTGAATTGCAATTCTCAAATTCAAAAGTCCAAAATAGCAAACGGTGCTCCGACTG  
ATTACGACAGCGAACTAAACAAGAGTGCTCAAGTGACAACGATCCGTGAATCGTCATGGCAACCAGCAGCA  
CATTCCAGCAGCGCTGGGTCTTTGGGTCTTTGCTGATGGGAGCGATGGCCGTCGTGGCCCAACCGCCCTTC  
TCGCACAAACACAATTTCCGGTAGATTACCGCAGCAACAGTTGCAGCAAGTAGGACCCAAATGCGCTCTCGTC  
GTGCCCAAAGGCCACGGAGAAAGTTGCATCACCATCGAATCAATCAACCGGGCATTCAACAAAGCTTCAAA  
AGAATTCCGACTAGTCGAATCAAGAGATGAAACGTACAACGAACAATTGGCCGAAACTCTTCTCGAAACAA  
GCCGTTTGTGGCCTTGAGCATAAATTAGAGACGGACGAGATTCAAGCGGCGTTACCATTGATCGATGTTT  
ACAAGACGGGCATCGCTCGCTATTGCCCAAACCGGCAAAGTGCGAACCGAGGCGGTTCCGCAACTACGA  
CGGGACGTGCAACAATTTGGATAATCCCAACTGGGGCGCCATTTAGCCCCATTCCGCCATCTTCTCCCGCCC  
GACTACGCCGACGATATCAGCATGCCGCGCATTTCAGTCACCGGCGAACAGCTGCCACCGCCCGTTACATT  
TCGTCCACCATCCATCGCGATCTCGGCTATCAGATCAGCCGTCACCGTCTTCTTCCGGCTTTCCGGCCAGC  
TCATCGACCACGATATGGCCGCCGAGCTGAAACTAAAGATCCGAGGACGAATGCCGAACCAAAGTGCTGT  
GACGTGTCCCCGATCGGCGTCACCCCGCTTGTGGCCATCGACATCCAGCCAACGACCCGTTCTACTCG  
CTCTTTGGCCCGCGCTGCTTGAATTCGTGCGCTCAGCTCCGGTTTTGAAAGACAAATGCAAATTTGGGACC  
GCGCGCCACCTACAACACGGTGACCAGTCTCTGAGCGCCAGTTTCGTCTACGGCACAAACAAGGAGACG  
GCCACAAGTTGCGCACCTTCCGCGGCGGCTCGCTCAACGCCAACCCGGCACTGCGCAATCTGGGCCTGAA

GGATCTCTTGCCATCGAGAAAGGAGAACCCCGATCAAATTGCAAACGGCCCAGTGGTGACATCTATTGCTT  
CGAAGCGGGCGATGCGCGAGTCAATCAGCAAGTCATGTTGGTCACGCTGCACACCGTTTTCTTGC  
ACAACCGAATCGCCGCCAATTGGCCAAAGTGAATCCTCACTGGGACGATGAAAGAATTTCCAGGAAACG  
AGACACATCATCGTCTTACGTCCAACACATCACCTACAACGAATCTTGCCCATGGTGCTGGGCAAAGAC  
ATCATGGCAGACTACGGACTGCTCCTCGATAGAGACGGTCTGTCGTCGGCTTACAACCCGAAAATCAACCC  
AACCTTCCCTCGTCTTCCACGCAGCCGCTTCCGCTTCGGACTCCGTCCTACCTCCAGATTGAACAGT  
GGAGCGTCACCCACAAACACGTCGGTTCACGAAGATTGAGCGAGTTGTTCAACCGGCCGTTCCGACATGTAC  
CAGGGCGGAGTGACCGATCGTTACATTTCCGGATTCATGAATCAAGTGGCACAGGCTGTGACGACGCCAT  
GACCGAAGAGCTGACCAACCACCTGTTCCGACAGACCCCTCAAGAGCTTCGGTGCCGATTTAGCATCGCTCA  
ATATGCAAAGAGGCAGGGATCACGGCGTGCCCTACAACGCCTTCCGCGCCTACTGCGGACTCCGTCGG  
GCGCGCCATTGGGACGACCTGGCTGGATCGTTACCAACGAGACGCTGCAAAAATACGCGAGAACGTACG  
CCAGTCCGGACGACATCGATCTGTGGTCAGCCGGAATTTCCGAACGACCTTTGCCCGCAGTATGGTCGGC  
CCCCTTTTCGGATGCATCATGGGAGAAACGTTTAAAAGCTTGCCTATGGTGACAGATTTTGGTACGAAAAT  
GGAGGATGGCCGAATTCATTCACGTTAGAGCAAGTGAACGAAATTCGACGAATTAAGTCCAGACTCTTA  
TGCGACAACGGCGACCGCATCGAAACTGCCAAGTCTACGCAATGGTTCTACCTGATCCACAAATTAATCCG  
AGAGTGCCCTGCAAAGTTCCGTCTGCCCGCTTGAACCTGGAATTGTGGCGGGAATCGAAAGGAAAGC  
CCAATGTCAAGAATTCGAATTTGCGCCACCGACCGCTCCCGGACCATTGCGCGGAGGCTTCAATAGCGTGC  
CAACTGTTCAACAACCCACGGCCTTTTTTCCATAATTGATCCGAGCACAGGAAACGGAGAAGAGCAT  
ATCAAATCAACGAAACGTGACACGATAAAATTGAAAAACATCCGAGTGAATGAAGCAGCTCCTCCGCAGT  
TAGAGCCATCCAGTATACGAGTAAAAAATCGGATCAAGAAAAAATAAAAGAGAAAAAATGAGCGTT  
GATGGGAAAGAAATTTTAAATAAAATAATTAAGATAAAAAAACTTACGGAAAAAGAAAGAAACGAAC  
CGCAAAAAAACCAATTGGGTTTCGTATAGATTATATCGTGATGATTTTTAAATAGCTATATTCTTTTGATGA  
ACTTTTAAACAATTTCTATTCTTTTCGGTCGGTTTTTTTTGTTTTTTGTCAATGGGGTTTTCCCTCAATTTG  
TTTTTGCCCGTTTTCAAACCAATGCCACAAGTTCTATCATTCTTTTTCTTTCTTTTCGTTAACGTTTACTATT  
CAATTTTTGTTGTTAACTTTCTCCCCCAGAGCTTCTGCAAAGCCAACGTGAAGCGATCAAACCATAAC  
AGACCAATGCCGTACATCTTCATTTGAATTCATCTCTTTCGCGCTTCTGTCTGGAATTATTGATATCACTTC  
ACGATGGCCACTCTTTTTCTTTAGACAAGGGGCTGGGCTAAACTATAGCCACTGACTATAGGAAAAC  
GGGATTTGTCATGAAAATTTATCCAGCAAGCAAAGAGACTCCATAACACAAAGGCCCGCTGTTCTTTAAC  
TTCCTTTTTGGTTTTGAAACGGAGGATTTTTAAATTAATTTTTTTTATTGTTCTTTTTCTGTCCAAATATT  
TAAAAAGAAAAAAGTAGAAAAAAGATGTTTTGATATGACGGATTGGTTTCATGTTTTCTGCTT  
TAAACAAACACACAAAAAATGTTATTCAATTTTCAACCCGACTTGTTCGCATGTGTAATCTCGCTG  
TAATCTTTTTCGTGAGGCCACAACAGCCGGACGAAAAGAAAAACAAGAAAGAAAATATATATGCATATTATAT  
GACGGCGTCTTACTACGGCAAACAGTATGTCATGGTTACAATTGCTGGCTTGCTTACGCAACATATAAA  
TATGCATCTCGGTTGTTG

>18 c20987\_g1

GGGAAACCATTTGACAAATTTATTTCTGGCCGATAAGGTTGTTGTTGAAACTACAATGTCCTTGTGCAA  
AAACTACGATGCTCCTGTCCATCGGGCCCTTACGCCTCTTGTGGCACCTTAGCGCCCTCCAAAATGCTAA  
GCAGCTTAGTACCTACGCTGAAGTAGCCCGCAGAGAAGATCCCTCCAGGGTCGAGTGGCCGTCCTGACCG  
CGTCAACTGAAGGAATCGGATTTGCCATGGCCAAACGGATGGCGTTAGACGGAGCTCACGTTGTCATCAGC  
AGTCGGAATCAGGAAAATGTCGACAAGGCGCTCGAGAACTGAAAAGCCAAGGGTTCTCCGCTCCGGAA  
TGTTTTGCAACGCTGCTGTCAAGGAAGCTCGTGAAGCTGATTGCAAAGCAGTCGACACTTTGGAGG  
ATTCGATATTTGGTATCGAATGTTCCGTTAATCCAGAGGGAGGTGGACGCCTTATGAAATGCTCGGAAGA  
TACATGGGATAAGATTTCCGTCAACGTCAAGTCTGGTTTCTTCTGGCCAAAGAAGCTTCCCTACATG



GAAAAGAGAGGTTAAATCATCGATCATTTTCACCTCATCGATTGCGGCATATATTCCAAACTACGGGGTCGACT  
TCTTGGGACCGTACGCGATCAGCAAAACAGCTCTCCTGGCCTTGACCAAATTAATGGCTTTGGAATTAGGCC  
CAAAAGGAATTCGTGTTAATTGCATCGCCCCTGGTTTAATCGATACCAAATTTGGTGAAGCGGCTGTCAAAG  
ATGAACGAGCTCAACAACTTCTTAACTAATTTGTCCGCTAAAAAGAAGTGGCACACCGGAAGAAATGGCC  
GGTTTGGCATCGTTTTTAGCATCCGATGACTCGTCGTACATAACTGGAAGCAATATCGTTGCTGCTGGTGGAC  
TTCACCTCTTCGTTTAAACCACCGATATCACCATAGCATAAGGTTACCATTAAATTAATCTGCTGTTGTCTCCA  
GATACAGTATCCAAAAAATTGGTTTCATCAAATCAAGGTCCACTTTGTTTGGTATCGTATTAATATTGGTTTTCA  
ACAGATGAAAGTTGTGTAGATCAAATCAGTTGATCTCCCTTTGCACCTCATGTTGTTGATATTTTCTATTTTT  
GGCAACTACATGAGTATACTTAACATTCTGTTGACTTTTTTCCAAATAACTCATTTAAAAATTTCAATTTCA  
GATTTTGTCTAAGATGGATGTGACATACCTCGTAATATTTGGTTTTTAATTACATCTTGGTTTCTATTGTTCT  
CTTTCATCGATCGTTATGTTAGGATTCAATTTCTGGAGAGTTTTTAAACATTGGGGGTAGTTTGAATTTGAAAT  
TGGTTTGTCTCTGCAATTGTTGGTTCGATAGATGGCCAAGGTCGAAAGCAGTGCAACTGCAGCGCCATTGC  
AGCGCGAACCGAAAACGTGGGTGGCATCTGCCATGCCATTCAAACGCTTCTTATGAGTTTAGTGAACGTTTG  
TTTTCCCTACTTCGTAATCTTGGCAGTATAGTGTATCTTCTTAGTTTATTTTTAAAGTTTTCCACTGCACT  
CACAGCGCATAAAATCCCTGTTGGAGCAGGATACTAATCATGATTTAAAAGGAAAACGACAACAGCTATTG  
ATTCATCTAATGAATTTCTAGTGAATTAATTGCCAGAAATAACCATTGATTTTCTATGAACAAAATCTATG  
GGGCATGCCAATGAAAATCAGTAAGAGATTGTGGATTGCATCATATAACTAGTCAATAAAGTGTGATCCATCT  
ACAGAATTACGGTATGGAGCCTTTGGATAGAATCTTTATCTATTGAATGAAGAATCATAGACAAAGGTATTG  
AATGCATAATCAAGGAAAACGTGCGCATGTATTTACCGTCGTTCAAGATAACAACGTGATAACATCCACTGAA  
GTATGTAGCATATATACACAGAAGATTGAGCCATGTAAATGAAACTGACCTTATGGAAGGGAAATTCACGAAC  
GCTCGCCGAATCTGGTGAGTTGAATTCAGTGTGTTGAAAGTTTTTTAACTACTAGTTCGGGCAGTAATAGG  
GCTGAAAAGATTCATCTTAACGAAATGTGTCCTGGTCGTACGCCAGCCTCATCTTTAAGTTACTCGACTCAT  
GTTCTCACGTAGCTCCTCATCTAAGCCACTTTAAAAATCATAGTGGAAAATGAATAGAGGTTGATAATTTGAT  
GCGAAGGGAGGAGCTAACGAGTAATGTAGGCGGGTATTTCGAGAAAAAAGGATTGGTGAATGGTTGGAAC  
AGACTTTGTTATTGAAACTATTTTTCATGTTATTCAAATGTATTGAGTTCAGTATTTTGTACAGGACAGCAAAG  
GTGAAAAGCTAATCTACTTTTCCCCAGGCACCATTACAAGTACCTTGAGATGTAAACATCCGTAAGATGTGGA  
AAATGGGTGGATTCAATCACGTGACCAAATCTTGGCTTCGAAGTCAAGTAGTATATACTAGTTAGTACATT  
TCAATAGTCTCAAGTCTTGAACCTTAATCTTCTTTTTCGTATAAACACAGGGGCAGTTTTTCCCAACTTGAATT  
GGTCATGACGACGTACGCCACTCCTCAATCTACGATTCGTCCAACCAAGGTAGGCAAACCACATTTGGTAAT  
AACATTGACAAGCCCGTAGCCTTCACGTCACAACTGCGTCAAAGCAGCAGGTTTATTTCAGTATGGATGCTCC  
ATATACATTTCAACCTAATGCCTTGCAATACAGATATGTGGTTTTGTTGGCACACCCTTACAAAGTACAGTAT  
ACAGTTGATTTTGTCTTTTTAAAAATTAGCTGCAAAAATTTGGCAAGTCGGCCTTTTCTATTAGATAAGGTA  
AGCCCATGTGACTACTAATTGATACTGTCTCGTCCCTATCACCATAGAGTCTAGCCTGTTAAGTCACTTATTAAT  
TTATTTTCGTATCAGTTATGTGAGTATCTAGGGTTTTTTCACGGGCAATGAGAACGACGCGTCCCATCTTGTG  
GGAAAATCCCAATAACCCTGAAGCAGAACGATTTGCTCAACTTTGGTACAAGTCCAAGTCAACTGATGGAACCAATG  
GAAACACAAGAGGTTCTTGTGATAAGGTTCTTATCATTCCATCATTTTTCTCAGCCTCTCTTGGTATATAAGC  
AGCAGCTAAAAAAGTCAGAAACAGCCAAGCTTTTCCAATAATCAACAGTTGACTGTCAATTTGTCGTACA  
CTAGAAAAAGCCATTCAAGATGCTGAAAAACGCAACTCTGTTGTCTCGTCGATTCTCCTGTCCCAATTGCT  
GGACAAGATGTCAGACAAATGACCACAGCCGTCGAACTGGCTCGTCAGAGGAGATGCCTGAAGGGTAGAG  
TAGCTGTTCTCACAGCATCAACTGACGGAATTGGATTTGCCATGGCCAGCGTTTGGCAGCAGATGGAGCTC  
ATGTTGTGATTAGCAGTCGCCATCAGAAAATGTCGATGCTGCACTCGAGAAACTGAAAAGTGAAGGTCTG  
TCCGCCAGCGGAATGGTTTGTACGCGCGTGTCAAGGAAGACCGTAACAGGTTGATTGAATCAACAGCCGC  
TGAATTTGGTGGATTTGATATCCTAATTTCTAATGCTGCCGTTAATCCGGATTCCGGACGTCTTCTAAAGTGCA  
CTGAACAAGTTTGGGACAAGATCTTTCAGTCAACGTCAAGGCTTCGTTTTTCTTGTCTAAAGAAGCCATTC

CTCACATGGAGAAAAGAGGAAAAGGATCAATCATTTCATTTCTCCATTGGCGCCTACCTCCCGAATTCGC  
CATTGACTTTACCGGAGCTTACGCTTTGAGCAAACCTGCTCTGCTTGGTGTAAACCAAATTGTTGTACAGGA  
ATTGGGTACCAGAGGAATTCGCGTAAATCCATCTGCCCTGGTCTCATTGAAACTCGATTCCGGCGATGTGATT  
ACCAACGACAAGAGGACACCAACACTCATGTATCATAACTGCCAATGCGAAGAAACGGAAAACCAGAAGA  
AATGGCGGGTTTAGCGGCATTTTTGGCATCTGATGACTCGTCGTACATTACTGGAAGCAACATTGTTGCTGCT  
GGTGAATGCAATCCAATTTCTAATCGCCTCAGTTTTTCACTGTGTCATTCTACATGTTCCATTTCCATTTATT  
GTTATTTACCAGACTTTATACCTTTTCAGTGAAGTATTGTAAGCAAATCAGACTCAAAGAATAAAGTATCTTT  
CTTCGATTTTCAAGCAAAA

>19 c23239\_g2

ACGGGCCAAACCTTTTACATCCTTCGAAATATTTTCCATAGAATATGGCGTGATTAAAAGTACACGATCAAGTT  
AATTTTTAGCCCATCTTTCAATACAAAATTGATTGAATTAGATTTTGTGTATCTATGGAATTAACCTTGCAGTT  
CATTGGAAGTGCCAAACAGTGTAAGCCAATCAGCGCCGTACATCCGTTGATGCTTTTCTTATAAAATGTCA  
TTATTTACAAGAGTGACAAGTAACTAATAAGAGGGGCAAAGAGGCTAATGTGCTTTCTCATTGGACATGT  
CAATGACTCAGGAAGAGAGCAAGGATAATGAATACAAAATCATGACTTTCAAGATGGGGTGTGTCTTATTG  
GTTTACAATACACTGAGTGCTATCAGACAGTTCCGATAAGAGAATGACTTGTTCATCCCTAGTCATTTACGGTG  
GGTCATGAAAAGGGAACGTCCCTCTGTTTTATTGCTCATTTAACGGGTAGCAACTAACACATCACATTGTC  
TTCTTTAAAAGAGTCTTAAAATATCAACATTGGCCAAAATATCGATATCTTTGAATTGAAAAGGAAAATG  
GACTCTGAACAATTTCCGCGCAGCTGCCCATCAAATGGTTGACTACGTCATCGACTATCTGGATAACATTCGCA  
ACAGGTAAGTTCCATACGCTATGCATTCAACGTGTACATTACGTTACACTGACACACGTATTTGCTTTAATGAC  
TTATCGCACTCTGGAGATATGACTGCCTAACCAATCTGTGTGCGGGTTGCCAGTTTTCTTAACGATTTA  
AAATGTGAACATTGTTTTTAAAAGGCGTGTTTTACCGACGGTAGAGCCGGGATATCTACGTAAACTCATTCC  
CGAAGAAGCTCCAGAACAAGGCGAAACGTGGCAATCCATTTTTCAGGATATCGAACGCGTCATTATGCCCG  
GCGTAATTTACATACCAACAATTTTGAATGAGACTTCTTTTCCAATGTTTTTCAAAAACAATTTCCAGGTGACA  
CATTGGCATTACCGAATTTCCACGCTTATTACCAACGGGCAATTCATGGCCGGCCATGCTAGCGGACATAC  
TTAGCGATGCCATCGGATGTGTGCGGATTCTCATGGGTAAGAACACGATAATTAATAAATAACCTTGTGTTATA  
ACCCAAATATAACTCTTAAACCTTGAATACATACTCAGATCGCTAGTCCAGCTTGCACGGAACCTGAAAGTGG  
TCATGATGGACTGGCTGGGCAAATTGATCGGCTTACCTCCTGTATTTCTGGCCAGCACAGGCGGTAAAGGTG  
GTGGCGTCATCCAGGTATACAAATTGACTTACATCCACTGGGGAATGCAATTTAAAAAATCCGCTATTA  
CAGGGGACGGCCAGTGAGGCCATGCTGGTTCGGACTTTTGGCGGCCAGATCGAAGACACTCAAACGACTCA  
AGGCCGAGCATCCCGAAAAGATGAGAAAATATTAGCCAGTCGTTAATCGCGTATTCTTCAGACCAATCGC  
ATTCGGCTGCGAACGGGCGGGACTCTTAGCCGGCGTTCACGTCCGTGTCCTCCCTACCGACGATCAACTTC  
ATTTGCGTGCCGACGCACTCCAGTCGGCCATCAAAGAGGATACAGCCAATGGCAAATTTCCATTTTCGTGG  
TTGCTACTCTGGGACGACACCTGCGTGTCTTTTCGATGACATTGACGAACTAGGACCTGTTGTAACGATCA  
TCTGTTGTGGCTGCACGTGACGACGCTTACGCAGGTTCCGGCTTTTGTGTGTGAAGAGTATCGTCATTACAT  
GAAAGGCGTTGAGAGGGCCGATTTCGTTCAATTTCAATCCTCACAATGGCTTTTAGTTAACTTTGATTGCTCT  
GCCATGTGGTTTAAAGATGCGGATGACATCGTCAGCGCTTCAATGTGGATCCGATCTTCTTGAACACGATC  
ATCAAAAACAACGCACCAGACTTCCGGCATTGGCAAATACCATTGGGTCGACGATTCCGGTCGTTGAAACTCT  
GGTTTCGTGATGCGATCGTACGGCGCCAAAGGGCTTCGCGATTACATCCGCAAGCAAATTCATTTAGCCGAGC  
AATTTACCAGATGTTGATAGCAGACGATGTTTCAATTTCCAGTTCCTCCCTCCATGGGACTCGTTTGCTT  
CCGTCTCAAGGGAGAAAACAGTTAAGTGAGAGGCTTTTGAACGCATCAACGAGGCCGGCCAAAGTGTAC  
ATGATTCCGGCTAAATTACACGAGACGTACATCATCCGCTTCGCCGTCTGTTACGTTACACGGAACCTGAGCG  
ACGTGCAAGCGTCTTGCAGAGATCCGACGTCACGCCAACGACATTGTCCGCGCGTAAATCAAACCTTAG  
AAAACATGACACTTAAGATATTCAAACCTCCCCTGGAACTTGTTTTCTTTCTTGGCTTAGCGAAAACGGAC

ACAAC T GACTCTGCAATTTATTATCAGCGCTTTTGAAGCTGATATACTAGTAATGTACAAAGTTCCAATACAC  
AAAAACTGCCACGTCATTAACCCACCAAAGCTTTGGAATGCAAATGGCGGCATTTTTTTCACCATTTTCTA  
ATTTAAAAAGCCACAATGTCGAAATCGGGATATCTTTAGCGAAGAAAGGAGTTAAACTGCCCGGTGGTAC  
AACTCTGATGTTAGCTGGCCTTTAGACGGGACGACAATCACTGGACAGTGCCGGAACGATGCCAGAC  
GTTTGAGTTCATCGTAGACGTA CTGCCATCGTTACTCCGAACATCACAGATAGGAGCACCGCCAGCTTCTCT  
GACGGGCCGACTGCAGAATTCATCGACGAGCCGGCCATCGATGATATTCGGCATTGACCTTGACAAACG  
GAAAGAGGGCAACGTGAAATTCATTGAAACTGAAGGCGTGATCAGCTGATAGTTGGAGCGAGAGGGTAA  
CGTCCCGTTAGTGTGAACAGCAACGATCCAGCGGATTGGTGGAGGATAGAGGGTGGATAACACGTTGGCC  
ACTTGATCGGCAAGTTGTTACGAGTCGTACATTCTGCCAGTTTCGTTAATTGGCGTTTGAAGCAATCAT  
TGACCAGCTGGATATTCGGGCTGCTATTTTACGTTACGTTCTTACGGCTGTTGTCCTGCGATTAAACTCC  
ACGCGAGACATTGTCACAAACGAGAGAAGTGCTCGACGGCCATCGTTCCATTGTAATTAATCGTTGTAC  
CGCTCGAATTTATCCACATCTCTGTGACGTTGCACCGATAAATCAGATCCGGCCACAGCTTGACCCAGCAAT  
CCTTCCATCAGTAACACAATATCGCCATTGAGGAGACGGGCACGTTCCAGCCACAACAGTTTCTGCAACTCT  
GAAATGTCACTTTGCCGATCGTTTTGCATGACGCCATGTGATCAAAGCTCTGAAAACATCATTTCTGCTTT  
CTTGTATTGGCTTGCTCATCGGGACGGATGAGATCTTCAATCGCCTGGCACCGTCCAGCAAGCTTCTCTCC  
GTCGTGCGTTGAGGTAAGATCCGTTCTTCGATCGCATCGATGATGGTGAATACTGCATCAAACATTTCTAACG  
CTATCTCGATGATATGACCAATTTAGACCAGTTTGCCTTCGGAGTCATTTGCAACTATATCTTCCATCTGTT  
TGTCCAGTTTTGACAACCAGTCCAGCACAAAGACTAGTAACAATAGCGTCGTTAATGTTTTGGCCATTTTCGT  
TCTTTTTTCTACACGATGGTCTCATTGAAGTATCCGAAAGTAGCACATGTCAGCACTGTATCTATTCCGGATG  
ATGCACTGTGAGGATCACATGAACAACACTGACGTCAGAAAGCAAGGTATCCTCTACATCTGTTCCCATATTGGA  
CAAGGCAATAACCCTTGACCTCAAGATGACACACACACCACAGTTAAGCTTGACGTTTCAGGGTTCATCGAC  
TCGTTCCATTTGGGGAGTACAAAAAAACTTCTTTGTTGTTGGTCCGATTCTGAAAATACACACTCTCGGG  
AGATGATTTCAACGTAGAGTTACGACGTAAACGCAACGACTTTTTAAACGCAGATGATTGGAGTCTGGATTC  
TTGTATGTCTCGTCTTCTCCGCTGGGGCGGACCGATGGAATTGGAGAGTCTCAAGGCCAGCATCAAAGC  
CCGTTGGATTCCGCACCGTCAGAGATCCATTCAAAGCATCAGCTGGAACAGAGGAGTCAAACGTCTGGCGA  
GATTGAAGAATCGGGTTCGTTGAACTGGAAAATGTTGGATCGCCCGAAACGTCTGAATCCGACGAATCGA  
ATGAAACTCTGTCTGCATCTCATCCGTCATCGAGGAGTAAAGACAGGCTGCCTCTTCTACGTCCGATCTTA  
TCCGAATCCGAGATCGTACTTGAGAAAACAGCAACGTGCCCCACGTGACTATTGCGACTATTTGATTACAGT  
GACGGTGGCTACGCGTATTGCTGTTATTATTGAATAAACAATAGAGTCCTGTTTTGCTGTCCATTGTGCCG  
CAGTAGTTCTGGTAAAAGGATGAGTCTCAAACAAATCAAATGAAAAATTTAAGAAGGTAAAGTCTTAAACT  
ATTACCTGTGAATAGA ACTGGGGTGCAAAAAAAAATAATAAATTTACAAATTTAGTAGATCCTTTGTTTT  
CATGACTGAAATTTGAAATGAAAGTAGCGACCCATTTCCATATTTCTCTAGAGTACAATTCTGTCCATTGGAA  
AGTTATAGATGTCAACGTTTAAGTGGGTTTTTCTATCTCTAGTAGGCTATTTTGTCCAGTCAGTTGCATCCAAA  
CGGTTAGTCTCTCTCGTTAACAAATTCAGTTAGTCCTAATCTTATTGAGAAAAATCTTAATTACAGATGATTC  
GTGTTTACTTGATCGCCGTTCTGGCCGTTGTGCTGCTGGGCCGGCCATCCGAAGTGGAGCACATTTGAAA  
GCGTCGCATAACCAACGCGATGCTCCGGCTAATGTTCTCCGGCAAGACGGAACGCGGTCCTGAGATCCT  
TCCGCCACCTGGTGGCGACAGACGTTACGACCACCGCGATATCTAAAAATGCGAAAACAAAAGACGAC  
GGATCGCAAATAAAACAGATTTCCATCCCCCAAATCGAAAAAATTAATCACA AAAACAAAACGGGAGG  
AGTGA AATTGCCGAAGCGGGACCGATTCCGGTGTCCACCGAATCAACCCGGAAGCGAAGATTATTTTCC  
CCATCGCCACTTCTTACGAAAACCTTACCGTACTACCGCAGACCTTACGGGAGAACAGGCTATCTAGGAT  
ATTACCGTACTATCCATTTTTCTTCGGCGCATTGCGCTATCCGTACGGATACAGTTACGGTGATTATTACGGC  
GGTTATGGAGACTATTACGGCGGATATGGGGATTATTATGGGGTTACGGTGATTACGGAGGCTACGGAGAT  
TACGGGGGTTATGGCGATTATGGAGGCTACGGAGATTACGGGGGGTTTTGGTGATTACGGTGGTGGATTGG  
CGATTACGGAGGCGGATTCCGGGATTTGGAGGTGGATTGATGTTGGGGTCGATGTGCAATAATAAAACG

TGTGCAAATCGTTTCTTCTCTTTTGTACTGTTTTAAAGAAAATGAATTGATTAACCGTCGCAATTAGA  
AAATAAAAACGATATCCTAACCTCATGGCGAACTGCTTCCTAATTCGTATCCCCGCAACGTTCCATATTTACTT  
CCTACGGTTTGGCTCGGACGAAATAAATTTCTGTATTACTTAAAAGAACAAAAACGATCGCTTCTCTTGAAT  
GTACAAAATGAACTGAAAAAAAATTTCTCTTGTGCGCAAAGTCGTAAGTGAAAAAGATAACAAATCCGGA  
AAGGTACTCACGATTTTACGGTCCCGGTTACGCGATTTCGCGCAATTTCAACAACGGCTGGAACAGATGAAT  
CCACAACGAGACGGGCAGACTACGGTTCAATCTTTCTTGGACGGCTGCTTCATCCAGGTGAGACACAACT  
CTGGAAATGGCTCGGGAAATCCGAGCGAACGGGCGTACGTTGCGTGATTGGTCAGGGCGGCCACGAAGTC  
CGTCTGATCCTCATCCGTGTCTTCGGATTTATTGCCGTGCTGACGTAATCTCCAATTCGAATGGAATTCATCGT  
CCATCTTCTCTCTTTTTCGCAGTTTTCTGGGTTAATTGAACCACTGAGTAGTGTCCAGATAGGATGGAGG  
TTTGATTGTCTTTGTTTTGCTTCGTGTGTCCCGCTGGAACAGCATCCGGTCGTGTTTTCTCGCCAATTAGCTG  
GCCGAGGTTGAGCAATGGCCACAATATCTTCGAGGATCCAAGGATATTTAATGAAGAACGGTTCGCGACTG  
AGCGGAAGGCTGGAATGGACGGATAATCATTGTTAATCACCTGTCCAATTGCGGTGTGAAATTCTGTTCC  
GGAATATTCGTCCATACGAGACGATGTTTGACGCGCCTTCACCATCTTCATGTGCAATATGATAGGCTCCAT  
CTGAAGAAACCTGGAATTTGTGATGTGATAACTGCTGACATTTTCGACTGCCATAGCAAAGGAGTATATTG  
ATTACGTTTCGATACAATTTTTGATGTGGAAGAAATCGAAAAAGCCTCTCCATATTCTCTTCGGCGAATTGTC  
TTCTGCCAATTTCTCGGCCGGCAGGTTGATGACGATGTGGATCGAATTTTTTAGCCGGAAGGCAAGACACG  
AGTAGATGGATAGGACAGAGTTTGGCCATTCTTCATCTTCATTTGATTGGCATTTCAGAGCAACGAAAT  
CGACGCCGTTGAGTTCGTACACCTCTTCCACCTGTCCGATGCCATGTAAGTGGTCGAGGCAAAGACGTAGTG  
AGCCCAGGGCGTAGTTGACAGCGCCAGGTTGTCGTGGAGTACCACGACCCGAAAGCGGGTGGTCCATT  
TTTAGATAAATGCCGATTTAATTGCAGAGGGAATTCCTGATGTAGAAAATTCGCAATTTAAGGGCCAGTCG  
GAACGAGGTTGAAGTAGGCCGTGAGATTAGTAGAGAAATGGGCACAGAGGAAACAGAACCATGGCGTT  
TTCTGCATAATGGCGGACATGGATCCTTCGCCACCAATAGTTCCACGCAATACGAGCAGTAAACCCTGGAA  
CAGGAGCCATTTTCGATACTAAACAATCTCCAGTCGAACCACAAATGGCACATCCCACGTGAATATCGTCTT  
CACCAACGCTGTAGCTTGTCCAAGAAGTTCACTCTTGCATTCTTGATTGCAAAGACTTCGAGAAATAGCG  
GATGTTCCGTGCACGGTCCCATGATCTCCACATGACAGCCAAGGCAAAAATAATCAATGTCCAGCGTCCGG  
CTTTGATTCTGTCCACAACAGCAATGTGCAATCTCGTGGACCATAAGTGACGTCATCATCTTCGGCATTGTTT  
TTCTTCTTCTCTTTTTGTGGCCACCCTGGAACGCAGACAAACGACTCTCTTCTTCTCGTTGAAAATCCTCTT  
TAATTTGTCGTTAGTGTCTTTGATTTCGGCTGATGCACCTTTCAGCCATTCAGGAAAGTCGTCCAGAACAACA  
TCTCGATTAGTGCTGCCCTTACGGACGAGAACAGTTAATCGCCACGATTTCAATTTGCCAGCTTTGGCAA  
GTCTAGGCTGGTTTTACTGTGGGCCAACACCTTCAGGGCTTCCAAAACACCTTTTTTCATAGAGTTGTTATA  
GGCTTGATTAAGCAACCGAACAAAACGGTCGTCCAGGAAACCGTAAGCTTTTCAGCCGGCATCTCAGAAA  
CGGTTTGATGGCCGCCAAACAGTACACCCAATAGTTGGTCGGTTTCTTGGGTGGAGGCAACCCACAATCAT  
TGTGCGTAACTACAACACCAGGCCACCAAGGCCAGCCGTCCAGCTTAGCCACACCATAGTCCCAAGACGA  
ATAAECTACGAGAAGCTAACGTTTTCTTTGGTTCCGGCGCCATTTCTGTGCGCTGTGATTGCTTCTGCCGG  
TTTTATTCCGCAATTTGACTACGAGCAACGACTTGAAGAAAAGTCGAATCGCCAAGTAAAGGCGATTCTGTG  
TGGCACATGTGCATACTTTGAACTAAATGCGTATTTAGTTTGAAGAAAAGTGGTAGTTGGGATTTTGTAC  
CCCCTCCCTCTTCTGAAGCGTTCGAGAAAAGGCCGAAACAGACGAGTCGAGAACATGTGGGTGAGTG  
GGTGAATCATGGCGGGTGTGGGAAAGATAGCTGCGTACCTTCGTCGACTTAAACGACGCATTTCCAGATATC  
CTGCAGCATTCTTTTTATTTTAGTTGTCCTGTGTGGCAATTCAAAACTACGTGACCGTCCAACGTTGATGCC  
GGCCATGTTGCAGGCTTCGTGTTGGCACGTAGAAGACGATGGTTGTGAAACATGAGGTTCCGACGTGACCTC  
GTTAGAGCTGGCCAAATCTGCCTTAGCAACGGGCCAATCACGAGCGATCTAGCAGTAGTGGTATGCACTAA  
CGTCGTCTGCACACACACGTGTTTTGGAACAAACGTACAGTTTTGACGGAATAAAATGTTTCTTCCCTATTC  
AAACAAGTAGATTCACACAACAAACGAGAATTTCTTCATCGGCTGGGGGACCTTTCACTTTTTGGGCTTGC  
AGAGATCACATCACATTTCTTTTTCTGGATCAGCTCAACTCCTTGGCGCTTTGTGACCTCGTCCATGGGGGAG

GTTTAGCCTAACTGTTTCTCGTGCTTGTAAACGGTTGAAGTAACAAATAGCAGAGGA

>20 c8533\_g1

GTCGATTTGGTGCATATATAAAACCAGCACGTCTGCAGTTAATCAGTTAAACGTGTCGAGTCTGATCCACCGT  
TTGAACGTCGTCTGCTCAGCTCCTAAGCAATAGATAAAATGGAGTACAAGGGACTATCACTGTTAGTTGTGAT  
GATTGTTGCCACTTTAATGGCAGATGCTTTACCGGCCGTATATCCAACAGCCGACGACATTGCAGCTTCCGAA  
CTGGTTGACGAACTGGAGATAGCAGCTAGTAATGTGAATACAATTACCGGGCTGCAGACCCCTACTGCAAT  
GCTTGCTCCAGTCGTTGCCATCACACTGTAGGCCTACAACAAAACACCATACTATTATGGTCAGCCAACTA  
AAGGGTATTACCGACTACCTCGATGAAACCAACTAGACCGACGAAACCAACGAGACCGACGAAACCGCCA  
ACGTGCACCGACTGCCCTCCGTGTAACCTTCCCATCCGAATTTTATCGGAATTTGCCTGGACGTAATCCTCG  
ACCTTGACCTTGATATTGGTAATAAATAAATCAACGAACACATCATCTTTAAAGGGTAATGAGAAAGAAGGG  
CACATTATTTAGGTTGATTTTGGGGGAGGGGAGGGCAATTATTTTGGTGGTGTTAATTTAAAAGATACT  
ATTTCTTGTTGACCATTTTGCATTTTGGGTGTGATTTTCTTCTGCCTGAAACTGGAATAAATCAATTTGAT  
TT

>21 c17941\_g1

TTTTTTTTTTTTTTTTTTTTTCAACGCGGTAACAGTTTATTGAATGAAAGAATAGAGTCATAATACCAAACAG  
TACGTAACAGTCCCTGGGAAAGCTCATGAAAAACAAAGGTGAAACGAAACACTAATTTAAATGGGAAACA  
GAATTTGCAGTAACAACAACAGGTAAAATAAGCCAACAAACGATTATTTAACCATGATAACCACCATATCCAC  
CAAACGTCTATATCCTCCATAACCTCCGTATCCACCATAACCTCCATGTCCCATCCGCGTATCCTCCACGGC  
CTCCATATCCCATCCTCCGCGGCGATGTTCCAGCGGTGTCCAAGTCGGCGGCCAGCACGTCGTCTTCAACCG  
AACGACGTTTGCAGCCCCATCCGTATCCACCATATCCTCCTCGGTATCCTCCACCATATCTTCCATATCCGCGT  
ATCCTCCGTACCATCCAGGACGTCCACCGTAGTATCCACCACGCCTATGGTGTTCGGCAGCGTCCAGGTCAGC  
TACTTCGACTGCTACGTCCGACTCATCAACGGCGGCGGCCAGGGCCATAAGGCAAGCTAATACGATCACAAT  
TTTCATGGTTGCAAAGTTTTTC

>22 c17991\_g3

ATTTTTTTTTTTTTTTTTTTCGTCCTATGTAGTTTATTTGTGCTTATTATACTTGATGACAGTGTACGAATG  
CGAACAAAGCATTAAAGGATGATGTTGACATAGGCTGGCGCATTAAAATGCTTTAGAAGGATGGGGATGGG  
AAAAATTTGCGTACGGGACATCGATGACGTTTAACTCGGTTGGCGGCGATCCAGTCCAAGAAGAAGGACA  
CCTGGGTGTAGACACCAGGGTATCCAGCCAAGGCGCATCCTGACCCAGGAGACGATACCGTGTGGACG  
GCAGAGGCACCAGTGCCAGTGAAGAGGGGGCCGAGAGTACCCTGGCAAGAGTGCATACCACCGTTG  
CTGACGTCACCAGCGACAACATGGATGGGTAAACTTCTGGGTTGGCAGCAGTTCCACCATAGAGACGGTT  
GCAGGTGTCGTCATCGACGACTGGGACATCTACGCTGCGGAGTGTGTCGGAGATGACACCGCCGGAGCTA  
GTGGTTCCCATCCGAAACGGTGACGATGGTTTCTGCAGGTGGGTCCAACCTCGGATGTTGGGGGTGGCA  
GAGCAATTGGCTGGGCAGAGGGAACGCTCAAGTCCAATGGGGCATCCAAGAAGAGCAGGGAGATGTCGT  
TTTCGAAAGTCAATGGTTTGTAGTTCTCGTGGATGATGAAGCTGGCAACACCAC

>23 c20854\_g1

CCTGGATTCGAAAGCTTATAAAGCTAGTATTGTGATTGCACCGGATTGCACAAGGATTTGCCAAGAAAATC  
TGCATTTCCACTGTATTTTGCACGAAACGGACGAAGATGACGATCCTCACGCTTTGAAAGACTGGATGCGCT  
TTCAATCCTTACAACATTGGACAATGGCGTTGCAAAAGGATAGGGAAAGTGCCTTGAATCGTTGCAGTC  
CATACGGTGGCGACGGAAGAAGAAAATGCGACGTAGTGGCATCGTGAATAATTGAACAAGGAGAGTGCAA  
ACCATAGGGCATGCCTCAAGAAAAACCATTAAGGTATCGAATCAGCACGGCATTGTTTGAATGACATTCCAT

TTGCGTCTCCATCCATCACGTTGACAAGAGGCTATGCCAATCGAACCGAAAATGGTAACTTGAGATTTTT  
AATGAAACGCAGAACGCCAGCATCCCATTTTTCCAAGAACTGAATGAAAGCAAAGGTGGGTATCGTGT  
TAGATTCCAACAGCGGCAGTGATGTGAAAATAGAATGCAAATTGGCAGGCTCTATCCTGAATGAAACAGCAC  
TCTGAACCAGTGAGCCACAATGGCAATGACTTTCATGTCGTC AACACGGAACAGCCCAATAGCAGCAGTAC  
GGCTTTAGAAAACGCGCTTGGCAACGATCCCAGTGACCTGGAGTGGTTCAATACTGTGCCCCAGGAAAAAG  
AAAAGAGGGGCGTTTTCTCTTTGATGTATCGCTCACCACCTTCGAGAAAATATCTATAATCTTGCAAGGTT  
AGTGGATTCTCGAAACCTACCACGACATGCTGGGGAAAAGGAATCAATTTAAACATCCCTTTGTGCTGCAA  
AGCCACTGAACAAGTGGCGCTGTTTAAACGAGACGAAAGGATTTAACTCGCTGCATTTCTGAATTTACGAAAT  
ATCATGTGCAATGGTTTTGTTTTGCCCTTGTGTGACGAAAAGATTGGCAACAATTGTTGCTTAAAAGCTATG  
GACTCATCGGTGTTGCTGAAAGTTTAGCACATCGTCAAGCAGTGGTTTTGAGTGAGCTATAAAAGCTTTGAA  
ATTGCGGAGTTGTTCTACACATTTCTCAAACCTCGAGTGGCGAGTGTCTTCAGTAAACTCTACAATGAAAA  
GTCTAAGCTTCGCCTCGCTCTTTGTTGCCATTGCCTTGTGTCTGTTGAGTAACGAACCAGGCGTTAGTGGAA  
CTGAATATGGGAACTGCAATATTGTGTGCCCGCTTGTGTTTATCCTGTATGTGGAACAGACGGAATAACTTA  
CGGCAACGCTTGCCTGTTAGCTGCTAAAATGCGTGGGATGGGACCAACGTTAAGATAGCACACAAAGGAG  
AATGCAAACCTTATTATTGAATAATGACATTTCTTCTCTACAATGAACGGTGCAGCTCAAATTTTTCAACTT  
TCATGCCTTTGCTTTTTCTGGTGTTTTTCAAAGGAAAATACAGTTTAAATTTTTAGGGGAAATAACTTTCAAT  
GCAGCGATAGCGAGGAGAAAGCTGCAGTACGAGAAATGGTTGCGTTGTTACGGTATATACAGCTTCGCT  
GGAACCATTTGACTATTTTCGGTTTTCCAATCTAGCTAGAAAAATGTAGGTAAGCAATTTGACACCCGGAA  
TAAAAATTGTTGCCTCAGTTTTTTGGTCAGAAATATTTATAGCTTGAAAGTGCTACCCAATTTACATTTGAT  
TTAGAGCATTTTGAAATGTCCAAGCTTCATGTGTGGTTTTCTTAAACGAACTTGCAAGAATTGTATAATCAAT  
AGTAGAAACCTCAATTAGAATAAGCAAATTATATGTTGCTCGGCAGAATTTTGAACACAGCTTCCAAATAAC  
AGGATTTACTGGAAAACAGTTGCTCATGTCAGAATCTCCCCTTATTAACGATGACCAGTTGGCCCTGAAGCT  
GAACTATAAAAACCCAGGCAACCCAGTTAGTGCCACACATTCATCAACGGCAAACGTTCTGCGTAAACGG  
TTCCGAATTTGCGGAGAATTTCCACGTCGTTCAATGGTACGCTTTTACATTTCAATTTAGATCTTATGGCATC  
AGTTACGATAAAAACCTTTAAGCTTTCTTCTCGTGAGCTAGAAATCCTTAGGTATCGCTGTGATCGTTGGGCTA  
GCATTGAGCTTTTCGAAAGCCCGCGCTGTTTCATGGAAGTATGTTTCTGATTTCCATTGTTTGCTATCC  
ATCAAGTGAATCTTCAACTGTTATCGCAGAAAACCTTGACAGACATGGTGGGTGCGAGATCGAGTGCTTATT  
GGACGACTATTTCCATTATGTGGAACGGATGGCAAACATACGCCAACGAATGCTTCTGTTCTGAGAGAA  
TAAGTGTGATAATGCCTCCGCTTCGAGAATCCGCAAAGCTTACGACGGAGTTTGTAACCTGGGTGAGCAAG  
GCTGTGAAATCCCTGCAATGGTCTCGGATACACCTTAAATCCATTATGCGGCACTGACGGAAAGACTTACG  
ATAACGAATGCAATTTGGATGGCAGGAACAAGTAGGGCAAACAGAACAAATCATTTTGAATCTAAATTTATCC  
GGTAACTGTTGTTACCAATTCGTGTAATATTTGTTAGGTGTGATGGCACGGCGATTAAGAAAGCTTACGAT  
GGAGAATGTAACTTACTGCGCAAAGTCCAACATTTCCCTGTAGGGGTGACATTATGTAATCCGTTATGTGG  
GACAAATGGAACTTGCATCAACACTTTGCCAGCCGATCGTTAAATTGCGTGAATGACACCGTGGTACTCG  
CCCTAGACTTACAACGGTGAATGCAAGACTCGCCTGGCTCCTCGCGTCAACATTATGGACTCAAAAAGGTTT  
TAACCTGTTTTCTCTACGCTCTGGACACACCAATTGAAAATTTTAAATTATGCAACTTTGTTTTGCTTTGTAA  
AAACATGCGACAGTGAAATAAATAAAGAGGGATTTCTAGCTTGCAAAAAAAAAAATGTTAATTGCTGCCCA  
AAAGGAACTAAGAATTATGCAAATTCGAATTAAGGTGGTTCAAGTTAGGGTACAAGAGATTTTAACTTCTA  
GCTCGGTGAGTTTCGTGTTACCTTTGCAACGG

>24 c19171\_g1

CTTCTTTACAAAGGCAGAATGTTTCAGATCAGTCTTTCTTTTTACGTCGAGAGCCCTAGCCTGCGCATTAAACCA  
AACGCAGCTGCGTAGACAGAACAACCTTACAGGGCAACGTCGTTACAGCAAGACTCTTTATCTCACGTCATCC  
GAGTCTATTCTCCATCAATTTCAACTTTTCAACGTTTATTTGTAGCAGAGAAGAAACCACGTCGGAATGTC

TTTCAGAGATCGTAAAAGCGGGTCAGATTTCCGTGGAGGAGCTCGTGGAGGGGGTCCAGTTTCGGAGGG  
GGCTCTGGTTTTGGGGGCAATCGTACTTCAAGAAGGCACAGCCCGGAGATAAGTTACGTAAGCCAAGAT  
GGGAGATGGATCGTCTTCAACCATTGAAAAGAATTTTTACAAGCCACACCCTAAGTTGGCTGTGAAGTCGA  
TTCACGAGGTTGAACAGTACAGGGCTAGTAAAGATATCACAGTTCGTGGTAGAGATGTCCCCTTCCCCATAA  
CTTCCTTTGATGAAGCAAACCTCCCTGAATACGTCATGACTGAGATCAGACGTCAAGGTTTCAAAGAACCAA  
CTTCTATTCAAGCTCAAGGCTGGCCATTGCTCTTAGTGGATCAAACATGGTTTGAATTGCGCAAACAGGGT  
CTGGAAAGACTTTAGCATACACTCTCCCTGCCATCGTGCACATTAACCATCAAGCTTACCTTGAACCTGGGGA  
TGGTCCAATTGCCCTTATTTAGCTCTACCCGTGAACTGGCTCAACAAATCTCGTCCACTGCTAAGGACTTC  
GGCTCGTCTTCGCGCATTGCAACACTTGTGTTTTCGGTGGAGCTCAAAGGGTCCCAGTTACGCGATATC  
GAACGTGGGGTGGAAATCATGATAGCAACTCTGGTTCGCTTATTGATTTTCTCGAAGCTGGCAAGACTAAC  
TTGCGTGTGTACGTATTTGGTTTTGGACGAAGCTGATCGGATGCTTGACATGGGTTTTGAGCCAAAT  
CGAAAAATTATTGAGCAAATTCGGCCTGATCGTCAAACACTCATGTGGTCTGCCACATGGCCGAAGGAGGT  
GCGTCAGCTAGCTGAAGAATTTCTTACCGACTATATTCAAATCAACGTTGGATCCTTGACCCTCTCTGCCAAC  
CACAATATTTGCAAATATTGACGTCTGCCAAGAGCATGAAAAGGAAACCAAACCTGATGACTTTGCTGCAA  
GAAATTGGTGGCGAAGATGAGAATAAGACAATTTTTTGTGAAACAAAAAGAAAAGTTGACAGCATCAC  
AAGAGCCATGCGCCGTGATGGATGGCCGGCGATGTGCATTGATGGTATAAGGCGCAACCTGAGCGTGATT  
GGGTTTTGAACGAATTCGCTCAGGCAAAGCACCATTTTAGTAGCTACTGACGTGGCTGCTCGTGGTCTAG  
ATGTGGACGACGTTAAATTCGTCATCAATTCGACTATCCCAACTGTTCCGAAGATTACGTCCACCGGATTGG  
TCGTAAGGCGATCGCAACGCACAGGAACTGCCTACACGTTTTTACACCAAACAACCTCAAGCAGGCC  
AGGATTTGGTGAACGTCCTGACAGAAGCAAACCAAGTTGTGAATCCCAAACCTTTATGAGCTTGCATCTCAA  
ATCGTGGTGGTGGAGGCCGTTCCAGATGGGGTGGCGCGGTTATGGTGGACGTGGAGGTTATGGGGGAG  
GTAACAGAGGCTATGGAGGCGGACAATCTTACAACCTCCAGCCGTTCTGGGTTGAACGCTAAGAACTCGAC  
GAGTTTAGCACAGATATTCAAAGCACCATCAACTAGTTCTTTTTTTGCAACCAACATTTAATTATCCAATTT  
AATGAGCTGAATGAGGGTCTCAAGGCGTTTTCATGAAAATATCGAGCATCTAACGCTTCGTTCCCACCACG  
CTTCATCTTTTCTTTTTGTAGGCCAATTTTTTCGACGCTTTTTCAACTTTTTGGCATACTACACCAGCCATTTCA  
CTGACACGTTACAATGACTCTTATGTTTGTTCGAGTTAACCGGAATACAAAGTAATCGTAATAAAAAAAAAA  
AAAAAAAAAATTA

>25 c20224\_g1

CGGGAGTGTGGTATACAGCCACTGTTGAAAAGCAATACGTTTTATTCAAGCATGAAGTTAATACTAATTATCG  
CTCTCTTTGTAGTTAACGTTACGGCTTCTGATTACACTAAGAAAAATCAGTATGATTCAAGATACGCCGTACAA  
CCATCTTATCCCTACAATCGGTAGATCTTTTACAGCTATCAAAAAGAATGGCTTCAACGTTTCGTCGATCT  
GATCGTAAAGGCTGGTTTAGAAGAAACCTTAATGCCAACAGACCTTTCGTCGTTTTGGCCCCACCAACGA  
AGCCTTCGACGCCATCGATCCTGCAATTCTAGCAGCCCTTTAAAAGATATTTACCTGTTGAGAGATATTCTC  
GTTATCATCTGGTGCTTTTACGGCAGCCATGCAGCCTCACGTCTTCCATCTATGTTGAATTACCTATAAACT  
GCGCTAGGTGAAGTAGTCCGTTTCAACGTGTACCGGAACAAAGGGCCTTCTTTGCTACCGAAGATATTGTA  
ACAGCTAATGGGGTACCACTCTTAAGAGGTATCCAACCGGTAAGGCAATATTACCCATTGAAAAGGTTCA  
TCAATCCGCAAGACGTATCGGCCAACAACACCGTCATCAATTTCTGAGAAGCAACAAGACTTCTCCATCTT  
CCTAAGCGTATTGCAAGTCCTGGCTTAGCTGAAAATAATTTCAAAGCCCGTCCGAAAACGACGTTTGTTC  
GACCAACGCCGCTTTAAAGCGCTTCCGCTGGTGTCTTGTATTCCATTTTTGCGACCCAGACAAATTGATT  
GTGCTTTTGAATACGCACATCGCGTCCGGAACCTTCTACACAGCCGGTCTCATTGACGGCCCCCTACTGTTT  
TAGCTGGCATCCAGGTGGATATCAACGTAACCTCCATGACATTATCGTGGGCAATGCTGAAATCATTGAGGC  
GGATATAACCGTGTGTTGAAGGAGTTGTACACGTTATCAGCTCGGTTATCCAAGCGGAAGAACTTGCTTCAA  
CCGGCTGTATTGATGGCGCATACTACAAATATTGGCAATGGAACGAAACATGGGATTTTTTTGAAGAAATA

TATAAAATACGAATATTTAGCAAAAAAAAAAAAAAAAAA

>26 c22933\_g1

AAAATGGACGGATTACGTTCTCGTCGTAATCCCGGCTGAAACCGTGCTGAAGTGGCAATAATCCGAGTTGC  
TGCATTTTCGCTCGACCAATAACAATTGGCAAAAACTCGTTGTAAGTGATGTGCTGCATTTGGGCAATTA  
TGGCTCTGGCCTCTTGATAGAGACGCTCATCATCCAGTGTGGATTCAACGTGGCCAGCAAATCCGCAACTC  
CGTTGTGCTCCCTCAAAAATACAGTTTGGCAGGCAACCATGTACGGAGTGACGTTAATTCGGTTGTACCTG  
CTCTGAAGCATTGACTTCTTCTGGTGGATCAATTCCGGTCACGGCTCTGGACAAGGCACAATCGACATCGG  
TGTCATTGTGGGTGGATGCAAATCCATGCCATGATGATAGCCATGTCGGGGACGTCGCAACACTTTCAACG  
TCCCTTTTCAAATGTTTCGAATTCAGCAGCGACTTTGTTCATCGGATCCATACAATCCGGAAAGATCCAGGAA  
ATGCGTGTTTTGGTTCATCTGTTCTACGTGACCGAGCCGGCCGTCAGTTCTGCATGACGGGGCAGACCTGGC  
AAATTGCATGCAACGTTGGCGAAAATTTGGAATAAAATGGATCGTCCTTGGGAATTTCAATCGGAATGCATTT  
GCCATGACTGAGATCTTCTCCGAAAGAAAATTGCCTTCGTCCGTGCAACAGGGAACTGGTAATCCATCAGC  
TGATTTTGATTCCATGGTTTCCAACATATCGTGGTCAATAAACTGTCCATACTGCATCACAAAAGTGCTGTCTG  
AATCGCTGGGCACGTCGATATCGCGAATAACGGACAGAGACAGCAAACGCGGAGGAGGGAGTTGGCTGCC  
ATCTTTAGCCAATCGCGGCATCCATACACCGTCGGCGTAAGCTGGAGCAAGTGCTCGTTGATATTGGGTTTTT  
GGCAGACCCACGGAGTATGTCGGGGAGGATGGGCATTATTGCACGAACCGTTCATCGTCCGAAAGGGAG  
AAGCCAACGTCCTTTCATCGCAATTAGGATGAATCGGGCACGTATCAAATAGAATAGTGTCTCTCAGACGGA  
ACCGGTTTGGCACACACTCGATTTGCTCTGGTTAATTCGGTACCTTCTGGATAGTTGCATAACAGCGAAAAC  
ACCGTACAGCGAACTATTGCTGATTTTACCGAATCGGCTGTAGAGTGAAAGAAGACCCAGCTGTGCGTGA  
AACTGCCCGATCCTTTTCTCAGCAGATATTCTTCTGCGTTAAACGCTTTTTCGGTTGCAATCATCGATCCATT  
TGCGATTGGCCGGCCAGGGCAGCTTCGTTGACAGCCACCAAATCGATATGTTCCACGTGAGGATCCAACGC  
GATGCCTTCGTCGATGGGTTTCGGCTTCTTAAACGGCGCTTGATAACGACCGTTGATGGGAATATCTGGACA  
ACAGAGTCCATGGCCTTTTCCGTTTCTAAAATGCAGGCAGTTCCAGGTGTGGCCGAACAGCATCGTACCA  
TACGGCGCAATCTTTAGCCGGCCGGCATCGTGAATCTAAACCACCGATGTTTGGACAATACTTTTCTGCGG  
GGTAGGATATCCACTGGCACAGGTTTGAACCTGAAGCGTAGGGGTTGTGATAGTTGGGTTTAAACACCTGT  
GGCAGGTGGATAATAGTCAGGTGTAATGGGCCGTTCCAGGATACTGTTAAGCGGTGGATGGTCCGGATAAT  
GACTGGGACGTTTTTGGCTGCTGGCCAGAGCAAACAATAGTTCCATTACGAGCACTGCAATCAACCACCGC  
AAAACCATTTCCCGAAATGATTTTGTGACACGACGAACTTCACTTTCACTGATTTAAATAAAGATTTAAC  
CGGAACAATTGACCTGAAACATTA AAAAGAAAAAATGTTTCAGTGAGGAAAATCTGGTAGAATAGTCTCA  
ATTGTTCCAGCGTCGTATAAAGCACAGTGAGCACTGCGGTGCACAGCTTCTTCTCTCCTCGATTTATAGTG  
CGCGATTCCAGCTCCACGTAATCCCAAAGTGGGCAATGATTTTCGGTTTTTTTTTCTGCTTCTATCTGGAC  
GTTCAAAAGTCCGGAATCGTGTAAATCAAGGTTATGCAACTATGAAGTAGGTTTTCTTTTACTGTTCCAATA  
ATAGAATGCCTTCTGCTCTAGTGATTTTCTAAGGGGTGAAAGCGATTAAGAGCAAGCCGTCACAAATGGTT  
ATTCATGCCAAACCGTCGGAATTGGATGGTGAATTGAAATCGAATATAATAACAGGTGGTTGGTTGCCAAAC  
AGGGCGTGAACGTCGCACTCGTGGTCGACAAAGAGAACTGTAACAACGAAAATAAGGAAAAACCCCG  
GGGGGAAGAATCTTCCGGACCGTTTTGTCGTTTAGCTAAATTGGAGTCGTAAAGGAGAAAGACATTAGTT  
TTAAAATTGATAAAAAAATTATTCAATCAGGTGAAAGGAGGACTGCACATTGGAGGAAATGAAAACAGGTC  
GTCTGTGGTAGTAGCATATGCTGTACGTCACACTTCCATATACCACACACGTCGAACCGTTGTTTTCAATTTG  
CAAGTGTCAATTTCAATGCACAGTTCTGGTTGAGCTGTTTTGGCCACAGAGTCTACCGGAAAGAGGAAAC  
TGTCAGCAATTAAGACCACGCTCAATGCACAGTTAACATTTGGCCATCAAATAAGATTTCAAACACAAA  
ATTACAATGGCGAATTGATGTGTCAACAATAAAAAACATGTTGTGTATGCAATTTTCAGGAAATCAAACCCAC  
AATCGGATAACGATTTCAAGAATGCAGTTATATAATTTGGGCTCGTAACGGTCCAGCTTTAGAAATTGCGTTC  
AGTCGAGCTCGCCTGCAAACCTATTAGCAAAATTAAGAATCTGGGGAATTAGATAGCAAGAAAAGAAAATG



AATTCTAAAAAATTTCCCGGAAGGAGACCACATAGTCCGCCATTGTGCCGTGTACGTTGTAGCCATTTGG  
GTATTGCCTTTAGGGTACACCAATTGCCATTGGCCAAAAGGCATTACATCCTACAGTATCGATGCACTTCCTG  
GCACAGTTTTTCGGCTGGACCGAGGTTTTCAATATACACAATATCGAAACCGACGTAATCACAATCCGAAAAC  
CATTTGACCTCGTATTCGCCAATATTCCAGGACGTCCGGATCGGCCTCTTCCACGGAAGCAGACTCATACGAG  
GAATGGAGGCCAGACAATTGCAATCCACAATGGGATTTCGTATCAGAACTGATTTAAAGATGAGTGGTTGA  
GTTGACAGGACGTGACTGTTGTACAGACCAAACGAGCATAGCTTGTCTTGCGGATTTCAATCAGTTGATCT  
TCTGTGAATGAGCCGGCCTGCCAGCCAGATCGTAAAAGTAACGATCACCGCGTTTCAACCTGGCAAACCTG  
GTCGGCAATGATGCACTGGAACGTTGGGCCACCAAGGCTCCTGGAGCTGGACGCTCCGAAAACGCTGCA  
ATGTACAAATCGATGTCGTCCACACTGTCGTAGAGCAACTCGAATTTCTCAACAACCTTTGGAGGGAGAACA  
TCGAGAAGGTCACTGAAATGTTTAGCTCGAGGTAGGCCACAAAGAACACGGTATTTCATTATAACCGGGCAA  
ACCTTGATCACGACCAGTTGAATATTGAGGGACACCAGATCCATGCCGAAAACCTTTCCCTTCTCTTCAAAC  
AAGTGATTGGTGACCTTTCAGTAAAGACGTTATCCACTGTTTGGCCGGGGATAGTTGCCATGGCTATGAGT  
AGCTTATCGATGTTTCCAGGTGGATATGCCTCTTGTGTTTTGAAAAATGTTGACGAAGAAGTAAATCTTTTT  
CGTTCACTCTTCTCGGTTGATGAGACTTTGTTTTCTGGAACGAGCGAATGGCCGTAACGAAAAGCGGCC  
GCAGCAAATTCGTTCAAATGGACGGATTCACTCGCGCATCGTAATCCGTGCTGAAACCGTATTGGAGTGGA  
AGTAACCAAGTTGTTCCATTTTCTCTCGACCGACGAGAACGGGCACGTATTGTTGTAGATTATATGATGCC  
ATTGAGCAATTAAGATGCGTCTCGTCTCTGATAAACTCTCTCGTCATCCAGTGAGCGTTCATGGCAGCAAG  
CTGTTCTGCAACTTGTTGTTGGCGAGAAATGACAGTTTGTGAAGCAACCATATATGGGGTGACGTTAAT  
TCGATTATCTCTGCTTTAAAGCACCTGACTTCTGGCGGTGGATCTATTCCGGTAACGGCTTTGGACAGCGCA  
CACGTAGAAATCTCTGGACCAACGTCGTCGGGAGGTGGCAAATCCATGATGCAATGCTTACCCTTTGTTTA  
ACTCGAGTTACATTTAAAGTTCCATCTTTAAATGTCCTTAAGTCACGAGCTAATCCTTCGTCTGAACCATAAC  
AGCCGAAAGATCCAAGAAATGTGTGTTTTGATTCATCTGATCTACATATCCTAATCGACCATTTGATCTGCAG  
CGGGAGCCGAACGTGCAAATCCATGCAACGTTGACCGAAATTGGAATAAAATGGGTCACTTTCAGGAATT  
ACTACCGAATACATTTGCCGTGACTGAGATTTCTTCCGAAAGAAAGTCTCCTCCATCCGTGCAACACGGG  
ACTGCCGATCCATCCACCAACTTTGATTCAACAGTTTCCAACATATCGTGATCAACAACTGTCCAAATTGCAT  
AACCAGGTAGTATCGCTTTCGCTGGGCACGTAGACATCGCGAATCAAGGAAAGAGATAACACGCGCGGTG  
GAGGTAATTGGCCCCATTTGAGCCGACGAGGTTCCACACACCATCTGCATACTCCGGTGCAAGAGCAC  
GTTGATACCTGGTATTCGGCACACCCCATGGAACACTTCCAGGAGGATGAACATTATTACATACTCCAGTTAT  
CGTCCGATAAGGTGACGTCACCATTTCTGATTACATTCGGGATAAACAGGACACTCGTTGTAAATGCCTGCG  
TCCTTGACA

>27 c23017\_g1

TCCTCTCAGGAGGCATACTATTATAAATCGATTAAGCTGCATTCTGTTTTCAACGTGAATTAACCCGTTATTTAA  
CGAAAAACCAACGTTTAATGTCACCAATCGGGGTTATCGGGATGTGGTTGTCGTACAGCCAAGTAAATATAA  
AGGAAGCGTTTACATATTTTCTTTAGACTGTTTTGTTCTGTGTTGCGTGGAATGCTTTACCAAACCTCAACTGT  
GATATCCATTGTTTGCCAAGTGAAGTTTCGATTTTCTGTCTAACTGGCAACTACAATAGGAGATGCTGAGTGA  
TGTCCAAGACGAAGAGGTCAACAAAAAGTTTTCAACGTCAACGTTACACGAAATAGCACGAGTTACAG  
AGGAAAAACAGGAACTCTGCTATTAAATTCAGATGTGAACAGTAACCAATTGGTGCGTGAAGAGAGACAGT  
TGCTCTACGGTCTGCTAGTTACGAGCTTCTGCCTTAAACGTATTTTCACTTAGTCTAACGTTTCGTTTTAATTCAT  
AATTGCATTGATGAAATTTTATCATTGCAATCTAGTTTTCCACATGCCTATCAGTACAAAAACCAAATCAGG  
GAACTATTCGTATTCTGGAGTCTGCAACGATGTTGTTGTTGGGTGTCGGAGCATTTCAAATGGAGTGAGT  
TTCTTTGCTTTTCTGCTAGTAACGAGGATCGAGTCAAATTCGGATTAGTTCCATCACTCATCAGACAAATACA  
GAAACAAGTCGTTTTCTTTGTCATCACACCAGCACTTGCAATGCTCATTGATTTCTATTTTCATCTTGGAGTC  
GAGGATTATCACCTTTTACAACCGTGGCCGGAATGGAAAGCAACCTTATGGCTTGCATTAGACCTTTCTCTG

CGACAGTATGTCCCATTTGCTGATTAATAAATCATATTAATTACCTGTTTCATTTGATTAGGTTTGGTTACTATT  
CGTCGTTTCGACAGTCGCACTGATCATTGTCATGGCTTTTTGACGCATTTCAATCATCAATACATCTTCAAAT  
TGACTAGTTTCATGCAAACAATGAGCGATCACGCGATTTACGCAATCACCGTCATCACTGGACAAGGTAAATT  
CGTCTTTATATGCCTCAGCATCAGGAGAAATGATTTATCTTCTTTGAAAGGCAATTCTGTTCCGCGAAAG  
AAAGACTTTTCATCCGTCTCTGTTAGGAATGTGGTGTGGACCATGGTGGTCTGGTAAACGCTTACACAAC  
AACTTTGACGTCTTACTTGACTGTGCCAAAAGTGAAGCCGATCGTGAACACGCTGGCCGAATTGGCAGCCA  
GTCACGATACACAGATGACTGTGGATTTGAACACTTAAATTTGGAAATCGTGATAATTCAGGAGGCCACATC  
TGGACCAAAGAAAATCATTGGCGATTGCTTTCGTGACCATCCAGAGTTCCTTGAAAAGGCAGCAATCTGGA  
GGGCTTAAAAACGTACTGGAAGCAGGAGCTACGTATTTACGGTGAGTGAAAGTTTATTATCGTAATAGGT  
TTTGATTGGTTTACTTTCTTTTTAAGAATCGTTTTATCGTCAAATACTTTATGGCCATCGATATAAAAGCCA  
CACCAATTGCCGAATGACCATGTCCGATCCAATTCCTTTATCGAATACTATTCTTTGGGTTTACCTAAAGGTG  
GTCGACACAAGTGGATCATCAATCACGAGTATGGATCGAGAATCAAAGTTTGTTATTGTTGTTATTTCTAAC  
ATAATTAAGTATTTGATGTTGATAGATTGCAGATTTGTGGGAAAATGGACTACTTGCCCTTCTGGTTAA  
GCAGTACACACCAAACGTTGACAAGTGTATGGTAGCTAAAGCTGAATTGCGCAAGGAAAGATCTGCTTTGA  
CGCTGTTAGATCTCTCGAGCGCATTGCGCTACTGGGCATCGGAATTGGCTCGTCGTTGTTAGTGTCTTTT  
TGAAATCATGACACATTTGAAACGAATTCGAAAATTCGCGGAGCCACGAATGCAATTATTGTTCAAATCGA  
TGGGATGGTGTGTTGAATGTTTGAATTAATCTTCAACCCAATAGTCGCAATCAATGTGTTGCTAGTTCACGA  
ACAAGTGTGAGCCAATTTAAATGAGTCTCTGTAGACGCACAACAGCCTCGTCCGATATTATGAAACAAA  
ATGATACAGTTACGAACATTGCTCTGTCAATTTTCATGTCACCTATGTTAAATGTATAATTAAGTATTTATCAAAC  
CAATAATATAAAAATACTTGTAGCACGTGATCTACACTGCACTTTGGCTTTTAAATTTAAAAAATTTAGTATGA  
GATCTTCGTGTATGGGGTGTGTAAGGCCGTTTGAATATTTGTCGTTACCTTCTTGCCACGCAAGAAGATTT  
ACACGGGGAATAGACGTGATTGCGAGCCACAAGTGGATTTGGACAGACTCCAATTTGAAAACCAATGG  
TTGAGTGTGAAGGACGTGGCTGTTGTCGCAAATTAGACGGGCAAACCTGCTGACGGATTCGTACAATT  
GCTCTTCAGTGAATGAGCTAGGCTGTCCAGCAAGATCGTAGAAATAACGATCACCTCGTTTTAGTCTTAAGA  
ACTGATCGGCTATCGTCACTGGAACGTAGGGCCAACAGTAGCGCCTTCAACTTTGGTCTCGGAAATGCCTC  
CGATAACAGATCAATATCATCCACCGAGTCGTAGAGGAGTTTGAATCGTTGACAATCGCTGGGGAAATCA  
CATCGAGGAGATCCTTAAATCTTTGACGACGAGTCCGCACAACACACGAAAGTATTGTATCCGGGA  
ATGCCGCGATCACGACCGGTTGGATATAATAGATACCAAATCCAAACCGAAGCCTTTGCCCTTCTCTCGA  
ACAAATGATTAGTAACCTCTTCAGTGAATAGTTGTCGAAATCTGCTGGGTTGTGTGGCCAATCCTGTAAG  
AAATTTGTCGAGATTGCCAGGTATGTAAGGGTTTGCCTTTTCAAGAAGTGTGCTGACGTAACAAAATGCGAG  
ATCCCTCTTTCTCTGAAATGATTAATCTGTTTTCTTGAATAAGCGAATGACCAAACGGAAGCTTGC  
AGCCGAAAATTCATTTAGAATGCCTGGATCACGTTGGCGTCGTAATCGTTGCTGAAACCGTGTGCAATGG  
CAACAGACCAAGTTCTTGCAATTTCTCTTCCAACAACACCTGGCAGCCATTCAATTGTAAGTATGTGCTGC  
ATTTGAGCAATCAAATGCGTCTAGCTTCTGTATACAGTCGCTCATCATCCAATGCGGATTCAAATAGGAAA  
GCTCAGTCGCAAGTCGGTGTGTTACGCAAGAAAATCGTATGCGTTGCTCCCAAATGGGACTCTGATTCG  
GTCGGATATCGCCTGCTTTGAAACATCGGACTTCAGGTGGTGGAGGAATGCCGGAACAGCTTTGGACAAG  
GCGCAATTTAGATCGGTAGTATTATCAGCTGGAAGTAAATCTAACTCGTGATGTCCCTTTCGTGAGTACTTT  
CAATTGGCCTCTTTGAAACGTCGTAATGTTGTGGCTGTGTTTACGTCAGAGCCGTACAGTTTGATTGATCC  
AGAAAGTGAGTGTGCTATTCTGTTCTGCGGGCCTAGGCTGCAATCGGATCTGGGTGCGGGAAGGGA  
TCGCACAAAGTTTCATGCAACGCTGACCGAATTTGCGTAAAACGGATCGTCGATTGGAATCTCAATGGGCAG  
ACATTGCGGATGAATAAGCTCCGTGTTGGTCAAGAAGTTCCTTCTTCCGTGACGACTGAATATCCGTGCCA  
GCGTTCTGTCGGAAGACAGAAGTAAGGGCCAAATCATGGGTGACAAATGTCCGAATTGCATAACCCAATG  
GGTATCCACTTGGCTTGGGGCATCTTTGTCGAGGACGACGGATATAGAGACTAATCGGGGACTAGGAAGGG  
GACCACCTTTCTGCGATACCCTAGGCTGCCAAATACCATCAGCATAAGCTGGGACGAGGGCGCTTCAAAT

GGGTCCTCGCCTTTCCCAGGAAGGATACTTAATGTTATTACAGGAGCCATCAATCGTCCGAAAGGTGAAC  
GAAGAGTTTTGCGATCGCAGATGGGATCTGCAGGACACGTTTTGGACAAAATTGTATCTCGCAGTTTGAATT  
GGCTCAATCCATACGCTGTCTGCTCCGGAGTCAATTGAAATCTTTGCGGAGTTCTCTGGTAGTTTCAATAGC  
AATTAAGCTCCACGACTGAGTCGTTGTGCTTCGTTTGTGTTGAAAGAATTTCAAATGATTGTATGCGGAT  
GAATTGGGTCTCACTGTAACATTGTGGATGCGACGAATTCGCTCGGTTTCATCCATTAACCTCAATTGGAAC  
CTCCTGCATGGGCAGCTGCGTTTACAGAGTAAATATCGATACACTGACGTTCCACTTTTACGATTTTCTTGGTC  
TCTTGCTAACTGATCCTCTATTGTGACCATTGTGGGAAATTTCCGGACAGCAGATCCCTGGATGTCCATCTG  
ATAATTTGCAGGATGTTCCAGGATAAGTCAGCACAAGATCGTACCAGATGGCACAGTCTTTGGCATGTGAC  
ACTTGGATTCGTAACCTCCAACCTTCGGGCAATAAAGCGAATGCTTGTGCGCGAATTTATCTGGAACATTAGG  
ATAAGGAGGTTGTCTTTTAGGATACGTTTCTGGAACCGGTGCAGGTTTCCAATCTGGCTGTGAGTTGACGG  
GATAATTGTTTGATAAATTGGTTTGCAGGATGGGACTGTAAGGGCTGGATGAACTCGTTGGCCGATGCGGTT  
GAGCGTAAGGACTGTGATAGCTTTCTTTAACTCAGGATATGACTTTGTGGAGACATAAGGATCTGGTTTGA  
ACGCTCCAGATTGCTCGTCGATCACGTGCAAAAAGAGCGGAGGCTTCTTGATCTCAAATCCGAGGCCTGAA  
GGATCGTACTCAACGAAGTCGCTTTGAATGGTCTTGTTCGAATAGATGGATGGGTTTTTCGTCTGATGATG  
GGCGTCCCATGATTCAAATTGACGTGCAACACGTTTCGCTGCTGTTGGTAACTTCTTTGGTGCCTCTTTGTT  
GTCGCTAGCCATCACAGCAGCGATTAGACACGTTAAGGCGGATATGATGATCCATCGCGACATGATCTTCGCT  
CCATAAAATTGTCTTTGGTGGTAGCGGATTTAACTTGTCCGTTGCAATCTCCTTTCTTTAGAATTGGCGGTA  
ACACTAGTTACCTACAAAACGATTAGCAAGATGTGTGCGTGCAGTTAACACGACGCGTTTCCACTATTAATG  
AGCTCTGCTGTGAACAGGGATCTACCTTTTGTATTTATACCTGCCTCCAATACGCAGAGAGACTTTTGCACAG  
CACCGGAGGTCTAGAAGGGGTGGGCAGTACGAAACGAATGGAATAAGAAGAGAGAATAAAAGGGGA  
AAAAAAGACGAGATTCTATTTCCCTTTCTCGGAATAGAATAGATACTGACGAGTGTTCGTGATTTTACTT  
TATATGACATAGTCAAGAAAACCGCCATGTGGACAGATGTGCGCCCTCTGAAATCCGGAACGGAACCGTAT  
CCGATAGGCCGTGAAAAGGAAACCTAGTTATCGTTATAGGCCATACCTTCTTCTCCTCATCAGTTCGAATT  
TTTACCTGTAGTACATCGTGCAGTGTGACGTATGCCAAAATAAGTACAGCTGACGGACGAAAAGTGC  
ACTTTGGAAATGTACACATAATCAAATAGGAAGTTAACTAACTTTATTTTTGTAAAAGAATGTCTTTTACTTT  
CAATTGATGGTGACACAGTTAAATTAATCGAATGCATTCACTACGTCTCGGGACGAACTGAGCGTTGTCATTT  
GCCA

>28 c19046\_g1

GAGCCGTAAGTTGCAGCCTTCGCCTTTGGTGCAACCACGTAGCTAGATCCTTTTCCGTAAGAGTCAGCTCCA  
TAGGTTGAGCCTTTGCCATACGATGTAGTGCCATAGTTGGTTCTTTGCCATAAGAATCAGTCTCGTAGGTTG  
AATCTTTGCCTTTGGGGGAACGCCATAAGTGCCATAGTCGGGTCCAGAGCCGTAAGAGTCAGCTCCGTAG  
GTCGAAGCTTTGCCTTTGAAGGAACTCCGTAGTTGGATTTTGGGCTGTAAGAGTCATCCCATACGAGGAT  
CCTTTTCCATTTGATGGAGGAGCGTAGCTGGATCCAGGGCCATAAGAGTCAGACCCGTAAGTCATATCTTTC  
GCCTTTTGTGAAGTGCCATAGTTGATTCTAGTGCCGTAAGAGCCATCCCATAGATTGAATCTTTGCCATTTG  
ATGGAATGTCATAAGTTGGTCCAGCGTTGTAAGGTTGGTACCCATCACCGCTGTATGGCTGTTTATTTCCCTT  
GTTGTTGTCGTAAGGCGGATACCCATCGCTACTATATCCATCAGCCAAAGTAGCGGCCACGAAACAGGCGAA  
AACGAATACCTTAGTGAGATTGAGCATGTTGCGCACTGCTGATTGGTGCTAGAGCAACTGATGAAAATGTTT  
GGAAGTGGACTCGTTTTATTTAGGAAGGAGCATAGGGAACGATTTGGCCGGCCTGTGAGGCACTCAACGAC  
GTCGTTTTGGTGTGACTAGCACGTAACCTTGGCCTCGGTTGAACCACCTTTTTTTGTTCCATCGAGTTGCAA  
CAAATCTCGTTCCACAGGCCAAGGCTGCATGAATTAACATGATTGCGACACCAGTTTTCAGGACCACTC  
CCTATATTCTTCTATAAATACCTGCTGATTTCCATCGTACTTTCGTCATTACCTTTTGGAGCACACTGAAATG  
GCATGAGTAGCTGTATAAGTTGTTTTGCTGAATTCATTTTCAATTTCTTGATCGATTAATAAATTTCTTACG  
GCTTTGTTGCACACTTTCTAACGCAGTCGTCATGCCAGCGGTGGATTGAGAAGATGCGGATAACCAAAGA

GGGGACACACTGATGATGGATCCCCTAAACGATGGATGCAATAGAACAGTGGATAACCTATGGGCCTAGTG  
GGGTGGATACAAAGGTTACCAAAGCTACGCTTGCCTTACGGGGACGACTGGACCAGACCTCTTAAGAGA  
CCTCTTCGAGCCCACTGTAAAACAAATGAACGATAGCTGACCCCTCCTTCGAAATTGCATTAAGTCTCC  
TCCGGCTATGCGTCGTCTCAAACAAATGAACGATAGCTGACCCCTCCTTCGAAATTGCATTAAGTCTCCT  
CCGGCTATGCGTCGTCTC

>29 c16960\_g1

GCGATGACTGCGAATGCGGAGAAGACTCCTCGTCTCATCCACTAACTCCACATCCACGGTGAACAACATG  
AATTTCTCGACATTCGAGTCATCGCTGTCTGGTTTGCATGGCATTGTCTATTGATGCCAGAGACCTGCAA  
AACCAAGGCCCGCTAAGCCTACTATTTCTCTTCAGCCATCTCTCGTGCAGCACTTCGTTTCATTGCCATCACGT  
TCATCACCTAGTAGCAATGTCAACATCAATACCAACGAGAACAATAACGAAAACCTTCATCTTCGACTCACTTTT  
TTCTGAGCTGATCAGCAATCAAAACAACCAGGATTAGATCCATGTGACGAAGACGACGATCTCTGCTTTTG  
GAGAACGATAGGAGCTGGCCGTCTTGCAGAAATTACCAAATCCATTGTAGAAAAGCAGGCAGGTGTTGCTG  
CTTCTGACGATGACGCTGAGAGTGTGAAGGTAGAAAAGAGCTCGGATGATATGGGACGAGTCGCCATCCA  
GTTCCGGGTTCTAGCAATTTGAACTTCAATTCCAACAGCAACGCAAACCTCCAACGATGATTTTCATCTCCCTAT  
TCGCATCTCTCCAGCAGTTTCTTAAAAACCAAAGGAACTCACCAAGAAAACCTCTGTTGCAGCTTAACTAA  
TAGCTTATTACCTATTGGCTACCATCTCTCTGGCACCGACTATAAGAACAACACTTTCTGCAAAGTTTTCT  
TTTTATGAAATTGTCATAGATTTCTGGTTCCATATGTTTGGTATGGGTATGATTCTGTTATGGTTGTGGAATCT  
AAAGACAAATATATCCAGATTATATGAAAAAAAAAAAAAAAAAAAAAAAAA

>30 c3162\_g1

TTTTTTTTTTTTTAAATGCTTGAACATGTAATCCCGGATAACAATTACTCAAGGGCACATTAATTGCCCTCTA  
AAATAGATGAACAGTCGTGTGACTTTACTGACAAATGCTGGTGAACAATCGCGTTTTCCAGCGACGGAGG  
CGATTATTCCATCACTGTGCTGGTAAAACATTGGCAGCAAATTGACCTTCGTAATTTCCGGGTGGGTAATAGT  
TGTAGACGACATAAGTTGTGCCACTGCTGCTCTTAGCCTTTCCGACACCCACCATCTTTGTGGCCTTCAAAC  
GACTTGGGTAAAGTGACCTGTCGCCATAGAGAAAACAGGTGAATTAATCATAATCTTTGATTTGTTGTAA  
AATGCAGTCACAGGATCTCTCCGTTCCGTTCCCTTCCCAGGAGGCATAAAGATTCTCTCAAAGCCATTAT  
TGCTGTGAACCAACGTGTCTTTCTGTGCGATTGTGTCGGCATAAGCCTGCGCCACTTTGGTGAGTCTAGGGC  
AGATGAATAGCGCTGGAGCACCGTGTCTTCTGCCGGTATTGGTTATGGGCGTTTAAATGATTACAGAGCGAAAG  
TACTGGACTGACGATCCGCTCTTCAAAGGCAATTTATTTAATTCCTCTCGGTCTTGCCAGCAAGTTCCTA  
GCGTAATCATCAATTGGATTGTCGGCTTTCACCCAGCAAACGGTACAGAAGGCCAATGCCAAAATAGCAGA  
GTTTCGAAACGCATTTTGCCTTGGATATCAATGCTGGATCTAATGATGCGAGTCAAGC

## **SF vs PF down-regulated genes**

>1 c22798\_g1

TTTTTTTTTTCAGGAAAGTAAATATTGTATTTCCCAAATAATACATAAGACCATCCATAAGATTAAGAGCTGATTA  
GAGAAGAATGTAAGACTTTAGGAGTCTATACAACAACAGAAACAGGAGATTACCACCTTTGTAAGACCATA  
TGTTTACTTTAATGATGCAATACCCACTACTATATATTTTCTTCATAATCCAAGTTATACAAATTAACCATGTGC  
GTGAGAGCTGTTTGACAAGGAGTAAAACCTGACCGTTTCGAACGAATTTGAGCGAGAACAGCCAAGAAAT  
AATCGTATAAAAACAAAAATCTCGCATCGTATATCTACACTAAGCAGTTATAACAACCTGTTTAGGCAGCGATAC  
AAGAGCTTGGCACAGTGAGTGAGCTGACAAAGTCTGCAATCTCCTTGACACTTGAAGGTGAAGGGTTT  
GCTGATCATCATAAAGGGCTTGACGCCAGGTTGGCAGAAGGCACTCAATTCAACAGACTCGCACTGGCCCT  
TGGTTGAGACACCCTCGTTGGTGAGTTTCTCGAAGCGGGTGCCTTGGTAGGGGCATTGGTGTCTACTCG

GGGAGGTGGGTGTGATATTGTTGGTCAATCGGTTGGCAAGTCTCGGTCTCCTTCTCAAGACGGCGAGAAAT  
CTCATGGTCCATGTTTGAGGCAGAGCAGTCCTTCAAAGAGTTCAACTGAAGCTTGCAGCCATAAGTTGCG  
CATCAGAAACGGCACACACGTTGGGGAGTCTTGAATTCACCTGCAACTTCTTGTTGAAATCACCACACATAC  
CGCAGGTTCTGCCACGCAGATGTTGAGGAGCGGTCAACTCGACGTGAGATCCTTGACTTTGATGAAGAA  
GTGCATGTTCTTGATTTCCATGATGAGGCTATCGGGATGGGGGTAGACAACAGCCTTGATTTCTTGCTCCT  
TCCTCGCGGATTTGAAGCGGCTCTCCTTGCCAAGCTTGTACTTCGGTCTTGTCTCCGTTGATGGTGACGT  
AGCCGGTAGGATCGAGCTCGACGGTGTCTTACCATAGATAACGGTGACAATCTTTTGTCCCTGATGACCCT  
GGTGGCAGTAACGGCGATTTGCGATTGCTTATGGCAATCAGTCATCAAGACATGGGGGCATTGCTGACA  
GTGTAGTTGTAATGAACACCATCATAAGTGAAACGGCATCGGGTCCAACGTAGCATCTGGCTTCGGTAACA  
CCTCCAGAAGTCAGGCTGGCAGCTTACGGATGAAGTTGCTTCCGGCGCTCAGAGGGAAGAAGACCTTCG  
AGTAAGCAAAGGTCAGCGGTGAGAAACGAGCCATTGGTTAACAGTTTCATCTCCACGGCGGAAATTGACG  
GCAACGATAGTTTCGGTGGGACGGACGAAGGTCATGTTGCTGGCTCCGGTGTAGGGATCACGTTTGATGGT  
CCAGGTGGCACGGTTGGCAGCGTTGGACTGTCTTGGATGTGTTTACGGTGAAAGGATACAGTCTGTAGT  
TGATCCATTGGCGGCAGCGTTCAACAGTAGCTAGCAGTCTCCGACAAGTTATCAGATTGGCGCTAAGTT  
CGTAGTTGTTGTAAGTTTGATCCATGCGGCGGGCCTCAGTGCAAGCAGGGCTCCGTACATGAATCCGGTG  
GCCAAATCTTCTGCACTGTTGGCCAGCAGGGCTGTACATGGCAGCCTTGGCGGCATAGTCGTCGCGGTA  
GACCTTAGCCTTGAAGCGGATCTTGGACTGATCGCACTGCTCTCCGAAGGCAATCTGGTCTCTTCAGTTAG  
ATAAAGAATCCTTGCTGAATCCGTAAGTGGGAGGCTTGTCCAGTTGCGGGTGGCAGTGTGGCAGACGG  
CGAAATCGACCTTCTGTTGGCACGAGAGCCGGAAGTGGTGTATTTCTGATTTGGATATCGGTGAAGTCCT  
TGGTGAACCAAGCATTCTTGGACATACCAACGGTGGCGTTGAAGAAAATGAAAGATCCATCCTTCTGCTCGG  
CAACGAGTCCGGTCTTATTAGGTGAGCGTTACCGCTTCCAGGTTCTTGAAGAGACGTCCGAGAACGGGG  
CGGAATTCAGGGGCAATAGTGCTGGGGGAGATCACCTCGGGCTCTGATGGAACCCTGGAGTGGGTGGATC  
CTGACTCGTAAACGACGGTGTGCTGGCAAGTTTTGGTGGCGTATTGGTACTGGAAGTAGGTAGAGACAGAG  
CGGGCGCAGTGCAGGATGGCTCATAACGCAAGACGTAAGTGTGCTGTTGCGGATTTCAAGGGGAACGAATCC  
AAGGTTGGAGAAAACCGTTGATGTCCATTTCTGGAAGCCTGGAAGATAGACATCTTGTGCGAAAACCTCGT  
ATTCGCTGTGTTCCATAAACTTGACGTTGACACCGAAGCGGTCACCCAGGGGGAATTCACGCTTGATTGGTT  
TGTTAGTAACGCTGATGATGGCAGTGGCTTGTATCCTCGAGGGTAGGTTTAAACGCTATCAGCGACATTGCGAG  
TGACGGTGTAAAGCCTGACGTGGTAGTAGAGGAGATCGGTGACTTTATTGCCAGGAGTCCAGGTAACCTTC  
ATCTGGCCGTTGTTAGGATTGTAGTTGAAGTTCAGCTCCTTGGGGCGCGAGAATCGACGCGGACGTCCAC  
ACCGGAAGCGATGTAGTTACGTTGAAGGGGATTTGACGCGGATTTCCGAACTCAACTCCAGCTCAATT  
CAGCGTTGACATCAGACTTGATGCCACCCTTACCGTCACCTTCATGTTTCTTGCATGGAACGAGAATGG  
GGAGGGTAGCGAGGAAGCGCATGGGCAGACCCAATTCAGTGGGGAAGCGGGCATTGTATTAGCCAACAT  
GCGGTAAGTGGTACGCTCACTTCGTACGGTTTGTGTTGGTACTTCATGGCCTCGTTGATCAAAGCGGGAAT  
AGTCTCTCGAGCTTCTCCATGTTGAAGAAACGGTTGATTGAGCCATCAAGTTGATGTGAACGAGTCCAGC  
GCGCTTGTGACGAGGGCGAGGAGTGGCGTTCAACTCTCCAGATTCTCTCAGGTTTTCAATGTTTTACC  
AGCGCTGCGGGAAGACATGGTTTCATACTTGTGTTGAGGCGGCCGAAAAGTTTGCCGAAAATGTTTTGCC  
AAACTTCGGACATGTTGTAGTTCCACAGGTAACACTGCCGGCTTCAGCGGAGAAGGGGCGAGCTGGTA  
GTAATAACGGTTAGCCAAGAAGACGGGCCAGTGTTCATCGGCGACGCGGAAGTTGGGAGAGTACATCATA  
ACGGCGACACCCTCTCCATGTGGGAAGAACGGATATCAGCGAAGGAGTAAGGAAGACCGAAAGGAGCA  
GGCTTAACCATGGGCCAGGCAACGTTAGCCTTCTTGTATCAGCTCCTCCAGGAAAGGAACGGATGGGGGCAT  
GTTGGTCATGGATTCAATCAGGCTGCGGGTGAATGCGGCAACTTGGCGGTTGGGTTCAAACCAAGTGCTAG  
AAGCGAATTTCTGCCAAATAGACTGTGGAGCATTGGACATGAACAAGAGACTCATGGCAGCCATGCGGACT  
TCAGCACGTTCCGGCGGTGTTGCTGGCCAAGTTAACCAAGATGGGATGGATCTTTTCAGGAACGACGAAAGC  
AACACGGTGGAGGGAGAGGATGGCGCAACACGCTCAGCGGTGTCATCGAACTTCCGGGAGTTCCGCG

GATGATGGGCAGCAAAATGGGGACGATTCATCGACACCCAAAGAACCGAAAAGCGGCCAAAGTAACAATA  
CGATCGGTGGTGGTTTTGCTAGATTCGAGTTCTCTAACGAGCCAAGGCAAGAATTCATCGATGACGACGGG  
GTCCTTGTGGTGCAGAAATCACCCATGACGGAGACGGGGTATTTCTTGGCGGCCAAGAAGCGAGAGCCG  
CAGACGGAATTCACAAATCAGCGATAGCAGCCAAAGTAGTCTGCTTCATCTCAGTGCTGGCCTGAACCGG  
GCCGGACTTCAACAGATTGATGAATTCATGGAGAAGCTGACGAGTCGGGGTCTTGGCATAGTAGCCGAGG  
GCGGCCAAAGCCCATGTTGCCTTAGCACCGGTGATTTGCTCGGTTTCGACCAACTCCTTGATCAACATAACA  
GCAGGGTTGCTGCCTGACTGGACAAGGCAGTCGACAAACAGAGTCACGGTGGGGTAATCCAAGGTCTTAA  
CTTCTTGCCACAAGGATTTAGTTTCATCCAGAGAGAATCGGGCAGAACGCGACCAATGACGGCCAAACGT  
TCCAGGTTGCTTCTCGAATCGGGGGTCTCCTCAGGTCCTTGGCGACGGTGCAGGGCAGCAATGAT  
GTTCTTGTGCAGAGCAGAAACGGGAAGAGGGCTGTTGATATAAGCATCGACCAAGTTGGGTTGAGCGGGG  
GTTCCATCGTGATTCACCTGGTGAAGTCACCGAAGACGTAAGACAAGGTCTTGTGTTCTTAGGTGAGGA  
CGGGGTGGCGAAACGTGAGCCGAAGCTCTCCATCTTCTCAAAGACCAGTCAATGATGACAGAGTTGGTCA  
ATTCATGGGTTTCAGTGGCGAAGGGCTGGACCTCAAATCGCTGAAGCCACTGGCATGGACGAAAGTCAG  
CTTGGGGAAAGACTCTCCGCAAGCGATGTATTGTAGATTGTGGAGCGTTCATGAAGTTACCGCAATCAGT  
CTTGCCAAAATCGCAGCTGTGGGTAGCGGGATTGGCAGTTGACCAGACAGGGTTGTGTTGGCAGCGGTTG  
TAGTCTTGGACTTGACAATCTGTAAACGGGCTATCCTTGCAGATGGCGTCGAAAGAGCCAACTTGAAA  
GCATCGGTGATGTAGACTTGGGAGAGGGGCAGACGGGTAACGGAGATGGTAGTGCTGCAGTCACCGCTAA  
TGGAATCCTCGAAGACAGTGAAAGTTTTGGTTTTCTCCTGCGGGGACGGATTCATAGTTGAAAATGCCAT  
CACGACGGACACCAGTAAGGTCGAGTTGCAACTGGCTTGCATGCTCTTCTTGTAGTTGACAACCCACAGG  
GGTTCTTCAGCATCGATTTCCAGTGAACGATCCCTTGTATGGGTGACGACGAATGGAGCTCCAAAG  
TGTTTCATCGTTGACGAACTGGTCTCCTCACCTTAATCTTTCAGGGTGAGCAGGTTGGATAACGTAACCAC  
TGTCGCTGATTTACCCTGGAAGTAGGGTTCTTACGAAGTTCCGTTACGTTAATGCGTCCATCGGTCAA  
CTTGACGACAATGGTGTCTCATCGATACTCTGGACGATAACGCGGCTTTCAGTTCAACAACAGCGTACTG  
TTGTTTGAGATGATACATGCCAGCTGCTGAACGTCAGCATATTTGTAICTATACTGAGTGCCCGTTCCCATC  
CCAAAGTCAGGCACAACAGCGCCGACAAAACAAGGAGAGAGGACTGCAGTTTGCCCATCTCGACGTCTTT  
GCTCAAGCCTCTCAAACGACTTGTGCTGCGATACGGCCGCTCCATCGCCTCTTAAATAGCCCAGTAAATGA  
AGATAATACGCATCACTCGTATTTTTTCTCCTTCGCTCGAAACAACCACAAATCGCTGATAATCGTCGATGA  
CCTTTTCCAGATAGTAATGTAGCCAATATGGC

>2 c23345\_g1

CGGGGGGGTAGTTCATTGAATTCATGCCAAGTACCAACACCGAGTGGTTGGGGCTGATAAAAATGAAACTC  
CTTGCACTCTTTCTCGTTATTGCCGTCGGATGTTGCGCTGGAAAATCTGTTGAGGGCCCTCGTCGTGCTTGG  
TTACCATCCAGGGAAGTGGTATGTTAACGGAAAGCTGATGCTGGAACAAGCCTCAATCAATAGCCCCGTCA  
AGATCCGTGGTGTCAATTTATGGTTTGGAGCCCGTCTCCATGCCATCCATGCTCACACTGGAACCTCATTGGG  
CGTTCAGTGCGAAAATGTCGGTGAACGACTTTTCGATGCTGACAAGCGCGAACACGAGAAATTGGCTGGCC  
ATCTCGGCAACGTCAAGACATTCACGGGTGTGCTTCTCGCACCGACATCAGCCTGATCTCCTCGCTGGTGT  
CCCTGTATGAAGACCATTCTCGCAGTGTGTTGAACCAAGTTCTCGTCGTCCATGCTCTTCCCGATGATTTGGC  
CCTCGTCAACAAAAAAGTCAGGGATTGCTGAAAGCCACATTTTGGCTTGCAGTCTGATCCTCTCCAACAA  
AGTTGAGGCTTTCCCGTCCATCGAGAAGGAGTCTATCCTTTGGGTTTGGAGACACCTTTCAAATCGGCAA  
GATCGAACAACGCATCTTGAGCGGAGAACAATCGTGGGAAAATGTCGTCATCCCATTACGGAGCCGTCG  
AAGGCCAGAAGGTGCCCTCCAACCTGAACTTGAAGGTGTCGAACGCCCATCCAACGTCGATAGCTTGACC  
CTCGAAACTGCTGCCCCGACCCGCAAAGTCTGGATGGCCGGTTACACTTACGAATACGACTACGCTGGCTG  
GACTTCAACTGGTATCATGGGCATCAGCACTAAAGTGTCTGGAGGTTCCATCAAGGGTCTGCTGACCATTGA  
GCCCGTCGATGAAAGCACCGCCGTTGTTGCTCTGCTTGCCACCAAGGGTAAGCAATTCACGAGGACGTGA

TGGAGAAATACTCTGAAGTCGATCCCGGACAGGAAGTCCGCATCATCGACCAAGAACACCTCGAGAAACCC  
TTCCAAGTCAAATTTGTTTCCGGCAAGGTTGAGACCGTCGCCATTGGCAAAGAAGAGCCTTTGTGGATCGT  
CAACTTCAAGCGTGCTTTGGCTGCCAGATCCAACCTCAACTTGTATGGAGTCTCTGGCGTCTTCCAACAGGC  
TGAATACGACAATACTATGCCGAGAACACCGTCTACCACGCCATGGAGGGATGTGCTACTGGTGAGTGCCA  
GACTTGGTACCACATCAGCCGTCTGCCCGTCAAGTTGTTGAGGCTGAGCCTAAACTTCTGCCCGCACCTGA  
GCTTTGCCAGAACTTCCCGTTTACGAAATCGTGAAGAACCAGCGACTTGGACAACCTGCCGCATTTGCCCAT  
TTTCAACTACAACAGCAACCAGGGACTCCGCTGCAACTTGGTCAATGGCGCCGGTTGCGAGAACAAAATTT  
CGCACTCTGACACTGTTAGAATCATCGGTTGTACTTCCAACGAGGGCCACTTCATCGTCCAACGCATCAAGTC  
CATTGACAAGTTGATCGTGAAGCCCTTACGCTACGAACTGAAGCCACCGAAGGTTTGACCGTCCAGCATT  
GACCCTGAGATCTGCCACCCCAACTGGCTACTCCAAGCTCGTTTCTCGCATCTCCTCTGATGTTACATCTACC  
AGACCCTGGCCTACTCCTACGATGACGACTACAAGACCCACGGACCCTTGTATGGGCAAGCCTACCCTTCGCA  
ATGTCAATTCTCCGATGATCATGGAGGTCGAGCCTGAGATCCTCAAGAAAGAGGCTCTCCGCCTGCTCTG  
AAATCATCAGCGATGTTGAGTCTGAGGCTTACTACGTCGATCCCGCTACCAAATACACTTCTGACAAGATCAA  
CATGCTCCGAGAGCTTTGGCTTCCCTTGACTACAACGAGCTCATGGCTTTCGTTGCCAGGTTTGGGAGAA  
CAAAGAATGGAGCACCTCCAACCAATGTTGTGACGCTTTGATGCTTACTGGCACCAACCCATCGTTGAT  
GTTGGTCCGCAATACATTCTCCAGGGTAAGATCGTTGGTGAGCAAGCCGTTTACGGCTATCTGCCCCTCGT  
CCCCACTGTTGAACTCCCAACAGGAGCTTTGGCCAGCTGGATGGAATTCTGAAATCCGAAGTCGTTCA  
GAGCCACCGCAACTCAAGATCACCCTGCCCCTGTCTCGCTTGGTCTACCAGGCCTGCGTCAACAC  
CACCCACGGCTTGAACATGTTCCCAAGTTGGTTATGGGAGAGTTCTGCAACCCAGTGACTCAATCGTCGC  
CAGCCAGTTGGTCCATACTTGGCCGAACAGGCTAAGATTGCCAAAGATGCCGGTGAGCGCATGGCTTTCT  
TGACCGCTTTGGGTAACATCGGACACGAGATCATGTTCCCTACGTCGAAGCCTTTCATCACCTCCTGCGAGCC  
CAGCTCTCACTACGAAAGCGAATGGTACGAGCGCAACCAACGCGACTTGGTCTCCTGTCAAAGAAGGAAA  
TGAGAAAGAAGTGTTGGAAGCCAAGAAGACCCCTCAACTGAAAAAGTACGAACAAGAGCAGGAAGATA  
TCGTCTTCGCCGCTCCGAATCCGAGGACTTTGAAGATGAGGCTCTCTGCAACCTCGTCCGCTCCAAGGCTA  
TCTTCGCCCTCAGCAATTTGGCCGTTGAGAAGAAGGAAATTGTTGGCACTTTGTTGATGCCCATCTTCTTCA  
ACAAGGCTGAGGAAACTGAGGTCCGTTTGGCCGCTCTCACTCTGCTCTTCGTCAGCAACCCACCCAGGCT  
TTCTGGTCCCGTGTGCTTTGAGCACCTGGTACGAGCCCAACGATCAGATCTCCCACTTTCATCTACACTACCA  
TCGCCAGCCGCTCGCCAACAAGAACCCTTAACCGCGAGGAGGCTGTCCGCGCCGAAGCCGTCATTGC  
TTTGATGAAGCCCATGTTCTGGACTTCCCACGCTGCCCTCAACTACCAAAGGCCGTTACTCTGAAAAGAC  
CCGTCTTGGATACGTTACCGAAACCGTCAACTTCCCCGATTTCGAATCTTTCGTCGCCCTCTCACCACTACAGC  
AGCTTGTCCGCTCGTATGGGACCCTGGTTCACCAAGCTGATGGAATTCAGCATTGACAGCAAGCACGCTGA  
GAAGTTCATCGATCGTTTGGTCGGAAAGCCCGTCTCCGTTTCAAGTCCAACAAGGACGAATCTTCCATTAT  
CAGCCCCGAATTGGAGAAGATCCATGAAGAGTTGAAAATTGAGGCTCGTGCCACTGGTCAACCCGAGTTGT  
ACATCTACCTGAACTTCTGGACAACCTACCAACGTTTCTTACCATCAACCCCAACACCATCTTCAAGATGATT  
GAGAAACAGATCCTGCAATCCGGATTCCGTGAGAACCGCCGCAAATTGGAGATCAACTTCCACAAGTACTT  
GCCTCTTTGGACTCGTTCGCCCGCATTCATCTGCCATGGGTTTGGCTTACACCTGGACTAGCCACCACAGT  
GTCCTCGTTTCACTCAAGTCTAAGATCGAGGGTGGCTTTCATGTCATCCTGGAGCGCCAAGTTGGAAGGT  
GCTCTGAAGCCCGTTGCTGTTTCCAAGATGAGCACTCGTCTGATGGTTGACACCCCGTTACCCCGCTTTC  
CCCACCACTGGTGTGATATGGAATGGGCTGCTGCTCTGCCCGTTCGCTTCTCGTCGAAGGTGACATCAAG  
ACTGGCAAGATCCAACACCTGGGAAACCTTGGGCGATAAGCTCCGCGTCGTCGAAGCACTCCGTTGTTCC  
TTTCACTACCATCCGCAAGATCACTGATTTACCCCGCTGCTTCTCTCCGAGACCAAGCGCATCTTACG  
TCGAGGAGCCTAAGGAGAACAAGTCAATTTCCGGTGAGAAACACCTCGGCATGAACTTCGTTTTTGTGAG  
CGTGGTGAACGCTTGGCTGTTGTTTACGCCATCAGTTTACAGCAAGGATTGGTTCCGTTACCTGGCTTTCGCT  
GCCATGCCCTCCACCTCCGCCAACGCGAATGGAGCTTGTACCTCGACAATGCCTCGTCCGAGACCAAGGCT

ATCAAGACCATCATCTCTATCTCTACCAAGTCTGACTCCAAGTTCGAAACTCCTTTGACCGGCCACCTCCATGC  
CAAGTCTCTCTTCGACACCATTACGGTGAGCAGATCATGAGCCAAGAGTACGTTAAACAGCAGGACAGCC  
AATGGGAATCGCAGAAGTTCCAACACATCTCCAGACCCTGACCAACCCACCGGATATTCTTTGGATTTAC  
CGCCGAACCTTGCCCCAAGTCTTCTCGATCAAGGCTCGCCGATCGGCTCCTCTGCTGCTACGGCATGGAT  
GGAAAGTCCCACCGTGAAGCCTTATGGTTGAGAGACGCGATGAAGTCGAAGGCCAGAACAATTTCTGTGC  
TTTGCGCCGAAGTTGACGCTCAATCCCCGACAACCTGGTTTTCAAACGCAAAGAAGTCAAGGATGAA  
ACCGAACGTCGTTCTACCATCAAGATTGGCTTCGAAAGTCTTGCACTGATGATCGCAAGATTACTGTTGCTA  
CCACCTGGACTCGCAGCGAGGAAGACATCTCTCTTCCCTGCGCAACCAGTGGGAAAAGACCCAGTGCCA  
GAAACAGGAAACTTTGGGCCGTGGTATGAGCGATGAATGCATTGCTGCCCGCCGTCTGTCTCAATCCTGAA  
CAAGGCCGTCATGACCATCAAGTACAACGAGATGCCCGCTGCTGTTCTCAATGCCACCATCAAGGCCTCCAA  
CCTCGTCCGCACTGGTTGGGTCCCTACATGTCTGACAACCAAGTCGAAGTTATGAACACCCAGAACCAGAT  
CACCGTCGAGAGTGTCTACTACCCGTTGGCTGGATCAATGGATGTTAAGGTTTTCAAGCCTTACTCCAATGTT  
TTCTCCGCGGAATCGAAATCCACCCATCGCTGAAGTAATCTTGCCCAAGCGTATGGCTGTTCCCGCTCTG  
TTTTGGCTGCCCGCGTGGTTGCTTGGCTCCGAGACTGTACCACCTTCGATGGCCTTTTCTACAACGC  
CTCCTTCTCCGGATGCGATCAGCTCTTGACCAAAGATTGCTCTGGCCGCTACAAGTTTGCCGTGCTCTCCCGC  
GTTGAAGGAGACAAGAAGATCGTCACTGTCTGTTGAACAAGGAGAAAATCGAGATTTTCCCGCTCAGCA  
GAAGGTCAACGTCAACGGTATGGAATCTCCGTAACCTGGCGAGTCTTACACCGTCAAGAACGTGAAAACG  
AAGTTTTGGCCGTATCAAGAAAACCGTGAATACTTATTGAAGTCGACTCTCCATCTCCACATGATCCG  
TGTTTTGACCGACGCTAAGGAAGTCGTTGTTTTGGCTTCTCCATCCACCGTGGCCGTCTCTGTGGTCTGTGC  
GGCTCCCAGAATGGCGACAAGTTACCGACCTTACTGGCCCCGCCAGTGCCTATCCCCCGTATCTGATG  
GATGTTGCCTACGAGCTGAGACAACCCGCCGATGCAAAAGCGATATCTTCCAGAGATGTTGCTGAGCTT  
CGTCGCATCCAGGAAGAATGCCTGAAGGAGAAATCCGAGACTGTTTTCGGCATTTCCGATGTCACCCCTTG  
TTGCCAAGTTCCAACAGAACATCTTGTCCAGCCAGACCATCCGCCGCCCTTCGAGTGGACTGTCTACCGC  
AACAAGATGGTTGTCCAAGACAACAAGCGTTGCTTCTCCACCGAGTCAGTGCCCAAGTGCCTGAGGGTGC  
TCGTGCACAGGAAACCGTTGAGAAGAAGCTGGGTTTCCACTGTCTTCCAAGAACATCTTGTCCGAGAAGT  
TGAACGAGGAGATGTCTTCCCGTCTTGTATGAGCTGATGGGCAAGCAAGTCGACATGGTGCCTGCTAC  
TCGGTGCCTACCACTTGCTTCCCTTCTAAATCAACAAATCAAAAATCTTTTTGTACGAGCAAGGAAATTGT  
TTTTACATTCTTCCGTGTTCCCTAACGACCCCGCTACCCACGTCAAATAATGACCTATGAAAATGCTAAGAT  
ATATTAATTTAGAAGTTGGATAGACTCTCATTATATCGAGAGTATCAAGGTATGGAATTGTTTTGAAGCGCC  
CAGCTTCTGTTGAGACTACGCCAGGGTATGTAATCTATATGAAAAAATATATCCAAGACAATAAATAACA  
AGCAGCATCACAAAATCCAAAAAAAAAAAAAAAAAAAAAAAAA

>3

c23476\_g2

CGTGGCCGAAATGCAAGTAAACACAATTATTTGTTCTTCAATGTCGCTATCAGCTCCTGTTTCGCTTCTGGTA  
AACTCGGCTGGAGGACATTGGTACCATCTGCCCCACAGTGGGAGTGGGTGGCATAGTTTAGGTGGATGGCA  
TTGCTTGAGTTATTGGTGATGCAAAGAATCACACCACCATACGAGAACGGGAAAACCAATCAGCTCGAAGC  
AAACACTGTTTCCATGCAAATGCGACATCTTTTTAAGTACAAGAGAGACAGATCCTGTTGCTTGTACCAGT  
ATATAAAGAGGGATTGCGGACCGGACCAAGTCGCTGTGCGCAGTATCCCCTAGGACGCTAACACGCACGA  
TGGCACGTCTGAGCCTGTTGGCCCTCGCCCTTCTCTCGTCGCCGGCCAATGCCGTGCGGAAGGTTTGTGTTG  
AAGATGGCCAAGAGTACCAATACAGTTATCTTACCTTACCACATCCGGCGTTTCGTGAACCTAATCCCTCTGG  
CTCCTCCTTCGGCATCCGTGGCAATTTGCTTATCCAGAAACAGGCCGAGAAAGCTATCGTCAAGCTTTCGGA  
TGTTACTTTGGGTATGCACAATGGACCCGACTCACTTCTCTCGACTGTCAAGTTCTTGAAGAAGCCCGAGTT  
GGCTATGTTGAAAAACCTTCAAAAATTTGTTCTTGAACGGAAAGATCACTGGATTGATGCTGACGCTTC  
GGATGCTGAATGGTCAATCAACATCAAGAAGGGTTTGGCTACCAAGTTGCAAATGGATGCTGTTGCCGGAG



AGATTGGCAAAGGAGACTGCATTCTTACGTACTGTTGAGGATACCGTTGTGGGCACCTGTAACACCACCT  
ACTCTTTCGGAGGCTCCGAGAAGGGCCGTCTGATGTTGATTAAGCAGCGTACCCAAAGCGAATGTACCAAC  
GTCCCTCGCATGAGTCACAACAGCTTTGGCGCCACCAACTGTGCCGAAAGTTGCAAGACGAACCTGTTGC  
CACCCTCAGCTTTACTACCAGCTTAGCCGCGGATCCAGCAGCAAACTGCCAAGGCTCACGTCAATTCATC  
CTTTGGCTACCAGTTCTGCAATGGCACCCACCTGCGGGATCTCCCTTCTACAACCTGGCCAACACCCTTTG  
GTGCTTAAGTCTTCCGGACCCATCGCTAAGCCAATTTCCGCTTCTGGCTTGACCAAGCACTATGGCAGTCTCC  
GTTACACCCTAAAGCGCCAATTCCTACTCCTGAGGATCTTGACTTGAGTCGTGAAGAAGACTTTTTGCACC  
CCGAGGAGCCCAATCCCAACAAGCTCTGCGCGTAAGGCTGTTCCCGTCTTGACTAAATTGAAGGAAGTC  
ATTGGATCAGGTGCTCTTAATGAGGAAACCCTCTTGATCCCACTGCCATGGCCGCCATTACCTTTTCCAAG  
CCATGAGTTTGAAAGTTTGAAAGCTGTCTGGAAAAACGTTGAAAGCGACGATGAGCTCAAGAATTTGTTT  
ACCGAGATCCTCCCAACTACTGGTACTAACCCCTGTGCTTTGATGGTCAAGGAATTGATCCTGAGTGGCAAA  
CTCTCCGATATGGAAGCCCGCCGTATGGTTGCTTCTACCCTACTACCTGCGCATGCCCTCTGAGAAATTGTT  
GACTTCTGGGAGGACCTGCTGAAGGAGAGCCCAAGCATCAAGACCAAGGAAGTGAAGGTTGCGATCGC  
TTTGGCTTTCGGTCATCTCGTTGGCGTCACTGCAACGCCAACAGACTTCGCCCTTGCAAACTGACACCAT  
CAACAAGTACACTCGCATGTCTACGAAGCTTTCAAATCGGCCAAGACCCACCCTGAGATGATTGTTGCCCT  
GAGCAGCTGCGCAACACCAACTTGATTCGCCATCGAGCGTCTCATCCCTCACGTCAAGAGCGGCTCCGT  
TCCTCACGCCGTCCGCCCGCACGTCAATTTTCGCTCTGCAGCCCATTGCCGCCGTCAACCGCAACAAATTCCTG  
TCTGCTGTCTCCCCCTGATCCTCAATGCCACCGAAACCACCGAAATCCGTATTGCCGCCATCTCCACCCTGTT  
CCGCGTCCAACCCACTTTCTTGGAGTTGCAGCAGTTGATCGCTGGTGCCATTTGGGAACGCAATCAGGAAG  
TGCTTAACTTCATGATGACCACTTTCGCCAAGTACGCTGATTCCAAGAATCCCTGCGTTAAGCCCATCGCAAT  
CAGTTGCAGTTGTTGTTGCGTGCCTCGCCACATCAAGACCAACTTCTCCGTTCAAGCAACCGTGTCTTC  
GACTTCCAGGACCAGAAATATGGTTTCGGTGGTGGTCTGCAACTTGCCACAGTCTACGGTGAAGAATCCCG  
CGCACCTCTCATATTTCCGGACGTGCCAGTTACCGCATTTCTGAATTCAGCTATGTTCCCTCTGAGATTATGA  
TCCGTTTGAAGGTGTTGAGGATGCATATGTCGCTCTTCCGCAAATTGGACCCTAAGGACTTCAAGCTTG  
ATACCCTGAAGGATCTTTTGCAAAAGACAATGAAGATTGTCCCCCGCAACAGGCTCCCATGAAAATGGAAA  
TCTTGTTCGTTCCCAAGGATACACTTTGATGTACCGTACATGGGAATGGAAGAAATCGCTGGTCTGATGG  
AAGGCAAAGGATTGGTGCAAATGATTTCTCGTGGCTTGAAATGACTCGCAATATGGTCAATGCTCGGTGGGC  
AACATATCAGCTGGAGGGCTAACGATGCTGGTCTTCCCGTCCGTTGGTCTCAGCACTCCTGGATTCCGCC  
GTCACCAGTTGGCTTACGGAAATGTCAATCAACCAGCGAAGCTCGGCCGCTCCATCCTGGCTGATTTGGACA  
TCAATCTGCAGGTGGTCACTTACATGGTGCCTACAACCCGCTCGGAGTTTCCAGGGAATCATCAAGGCC  
GTGGATCCCGCATCCATTTGCCGCTAACCTTTGGTTGGTTTCTCACCTGCCGACAGCCAAGTTGAAATCAA  
GATGAATACTCCACCGAAGAGAAACCTTTGTCTTACTGTTTAGCAGCAAACTTTCGCTTTCATGTGGGG  
CAAAGATGACTCCAAAGCCCTTTCTTACCTTAAGGATACCTGCTCAGAATGCCAATCTAAAGCTCTGGTAACT  
CGTGGCGAACAATTCCGCAAAGGTCAAGTTATTTCGCAAAACATCAACGAACCTTTGGGTATGGAATCTCAC  
GTCGAAGTTTACAACCTGCGAAACCTACACTGGCAAAGCCTCCATCGCCAAGGTGATCTACGAATCATTCAAG  
CCCTCAGAAATCAATTCGCACGGCAGCGTGCCCGTTTCTTGGTCAATGGGATTCATGCAATGCGCAACTAC  
TTCTACCAATACCCACCCACCGCGCTTGTTCATGAAGGCCGTTCTACACAGGACTCAAGTAAACCCGGCT  
GAAGCTATCGAGATTAAGCTCAAGATGGATTCCGCTGTACCAGCTGGCAAGAAGGCCGCCAGGCAGAA  
GTTTCAGCAACGTTAAGGGAGCCATCACTTTGTTGGGCACTCCTGAGCGCAAATGGAACGTGGAAGTCAAT  
GTGAGAGTGAGCCTTTCAATGTCAAATCGCAGGTGCGCGTGAATAATTGCCGCTCTCGCAAACCGTGAAC  
GAACGTTCCCAACCGCTCTCTGCGTGAACGTCAAACCGCTTGGGCCGCTTGGCAGAGGACATTTTCG  
AAACTCCGTCATCCATCGAGCCTTCCGTTACGCGTGAAGTTTCTTTCGTTTGGGAGAAGCTCCCGCTGACC  
AGTGCCCTAAAGCTAATGCCAAGGACATCTCCACGATTTTATGATCAAGGTTTCAAGGTAACATCACCGACGCTC  
AAAGAGAAGCCGCCACCAGCCGAACACCTATCCCTATGATCGTTGCGATTTGGACCGCAACGATGCCGGC

CGTTCTGGAATCGTTGGTCCCATGACACAGGCTTGTTACGAAGCTGTTCTCCACTACGCTACTCCTCGCAGCT  
ATGTTTTGGACATCAATTACGCCAACATGTCCCCCGTGGTCAGATGGCTCTTCTCCGTATCGACACCATGCTA  
AAGGCCTCCTGTTGCCCCTACTGGAGCATGCATGCCCCACATGGTCTACCGCCAGCGCCAAGAAAGTCGCC  
GGTGTGGCCACATTGAATTGAAAATGGACGTTAACGAAGATGATGTTGACTTGATGTCCACACTGACTTG  
ATGCACAGCCATTACGAGAACGTTGATGTTCTCAAGAATTTGGGTATGGCTTTCGTAACGCCCGTCTGCC  
ATGTCTCAAATGTTCCGATCAAGGCCGTTTCGTTGGTATTGCGACGTTGCTCCCAAAGCTGTTGTCACCT  
TCGACAATGTAACCATGAGCACTGACCTGCCACTTGCTACACGCTCATCTCGGCTGACTGTTCCGCCACCCC  
TCGCTACGCCGTTTTTGGCAAGAAAATACTGGTTCATCTCTCCGCTGGCTGTCAAGATCTACGCTGGTGGC  
CACACCCTCGAACTGAACCCAGTCTCCAGCGGCGTGGAAGTCAAGGCTAACGATAAGGTTGTCAAGGTCGA  
CGCTAACAAAGCCCTACGTCTTGAGCGACAAGGACAACGTGATCCAGTACATTGTGCTTAGCAAGATCGGCG  
CTCGTTACTTTGTCCAGGTTCCAGTCTCAAGTTGACCTTCCGCTATACTGGCGATGACATCACTAGCATGATC  
CCCGCCACCCATCGCTCTCAACATTGCGGTCTTTGCGGTGATTACAACGGTCAATTTTCTCGGAATTGGTCA  
GTCCATCCGTTGCAATGTTAAGGATGCCACCGACTTGCCAGGTCCTATGTTTTGAGAGACAACAAATGCA  
AGGACAACATCCCAACTCCTCTTGTGTTGCTGAGCCTTTGAGCATTGGTGAGAGAAAGACCCGATCCGTC  
GGAATTGTTGGTCTTATGGATAAATTTATCCGTTCTTAAAATGAACATAATCCGTCACGAAATTCTCGTTGCCT  
TATAACTGACGAATCGAACTCCTGAATAATTTTTTTTTCTCTATTCAATTTTCGACTTTATCGTGGAGCCTTAC  
AGAGCAAGGTCGACAATCCTTTTGTAGTTAGTTGACCCTGTGTGTTCTCTAACTGTTCTCAAATGACTACC  
TGAATACAATAAACAGGAATTTAAAAAATAAAAAAAAAAAAAAAAAA

>4 c18434\_g2

TACATGTGCTTTTCGTATAAAAAGACGATTGAGAATCAAACCTCGGCACTTGATTTGCAGCTTCTGTTCTATTCA  
AGCAGTCAAATGAAAGTCTTGATCCTTAGCGTTTTCTTGGCCTGTGCCTCTGCCAGTATTACCCTACTGGC  
TACTTTGGCTATCCCGCTTCACTAGCCAATACCACGCCCAAGATGTTCTCGGACAGGCCTCTTATGTTTTCG  
CCCACCCCGGACAGTCTGCTGCCATTACCGTGACGCTTACGGAAATCAAGTAGGATCTTACGTTACATCAA  
CCCGGAAGGAAAGCACGTCAGCGTTTCATACACGGCTGATCACCGAGGCTTCCGCGTCTTGTTCCAACGACT  
TGCCTGTTGCTCCCGTTGCTCCCGTTGTCGAGCTCAAGTCTCCCGAACCCGTTCCAGGACACCCCTGAAGTAG  
CTGCTGCCAAAGCTGAGCTCTTCCAGGCTCCAGAAGGAAGCATCAACTGCCGAGCCGGAAGCCGTAAGAA  
GCGCCAGGTTCTTTCTACCCAGCTGCTCTGCCCTACACCGCACCTTACTTCCCTTTCTACCCGACTGCTCCCG  
CTCCATTGGTAGCTAAGACCACCGTGAAGGCCGTCACTGCTGAAGCTGATTTGACTGCCAAGACTCCAGCTG  
ACACCAACAAATTCGATCTGAAGGAGAAGAGCTATGATGTTGTTACTCCTCTGGCCTACCACACCCCATATTT  
CTACTCTTATCCTTTCTATTCCGCTGCTGCCCCCGCTGCTGCCGCTCCCGTTGCCACCGAGAGCTCCCGCAAG  
AAGCGTCAGGTTATCGCTGTTCCCGCACCCACCCAGCAGTTCCTTGATGACCTCAAGTACAAGAGCGTCGAC  
TTGAACCAGAATGGCATGCCGATAACGCTGTTGTCCCAGTTGCTCCAGCTTCCCTGCTCTGCCTTACCTGC  
CTTATTCTGGCTATGCTTACTCTACTACTACCCGACCGCCTACCCTTTCGTCAGCAAATTTCTATTAGGAAATTG  
CAAACGGATTGACATTGCGATTATCGAACACCCACACCCGTTGAGTAATAACTTTATTGTTGCATATGTGAAG  
GGATGATGGCGGAAAAATATGAATTGGAATGATTATACATTTTTTTTGAACGATATTGCATTTTCATTTGTG  
TTTTCAAAGAGATATGGAAGAAAATGGACTGGGTGATATTCGATCCGATTTACAAATGAAAGCGCTGTCTG  
GTGACAGTTGACAAATGGAATGTAATTCAACCTTATGTTGAATGAATTGTTATTCAATTTTTTTACGTTTTTGCAT  
TTGCATACACCTGTAGCGTCAGATAAAAGATGGGGTCTGCTGGCAG

>5 c16077\_g1

CTGGCCATCATAATGACACCAGATTCTTCCAGAATTTGCAGCGATCACCATATCCCTTCATCCCATCATGCAA  
TACATTGCCGTTGTTGTTCTGGCTCTGGCCGTTGTCGATGCTGGTGCATTTATGATGGCCAGGCCGGCAATG  
TTGCTTACAGCATCAATACTGTACCTTACGCTCTCCGTACGCCACTCCGCTGCTAAACCCAATCCCTACCGAA

ACCAAAACAGCTGATCCCGCGAAAAACAATGAAGCCATTAAATTTGTATATCCCCAATTTGCAACCTTCGTTCC  
CTGCTCCACTGTACGGCTCGGCCGTTGTAACAAGGACGCAGCGGCCGATGCGAAGAAGATCGAAACCGC  
AGCAATTGCCACTCCTTACCCCTACCCAACCAGCTTCGTTTACGGGGGTTACCCCTACGCTCCCGTACCTTTT  
GGTTATCCTTACGGTGTGTTACCCTTGAACGCTAAGTCTGTTACGGAAATCAAACCCGTCAAAGCTGCAGAA  
ACAACCGAAGAGAAAAGCAGCCGATAAGGACAAGGTTGCTGTTACTTACGTTGCTTAATCCCGATTTCTTTT  
ATTGTTACCGACGATCCACAATCGACCATGAATTCATGCAATTTATTAAGTTTATTTCCCTTGTTATATTGGATGT  
TTTAGTTATAGTACTCTCATTGAATAAAATTTTTGTTGCACAAAAAAAAAAAAAAAAAAAAA

>6 c2265\_g1

GGTCAGACTACATTCTCCACATTATCGGACCATGCTTCAAGAAAAGCCATAGGAAACGCATCAAAATTTGCTA  
TTTGAATTGGGCCACCAAAAATGCTCAAACGACGTTTGTATTCTTTTACATAAAACGCGGCTGATGTCGCTT  
CAACGCATGTAAGCCAACTGTAAATTGAAACCATGTATTTTGATAATCCTCTAACTGATTATTACACTACC  
AGCGTAATCGGTTAATCATGTGATATAAATTAAGGGAGCAAACAACATAAAATTACGAGGAGAAAATCGC  
CTTAGAAAACAAAACACCCGTAGCAAAGTCGGCAAATTTTTAAAAAATTCCTTTTGTAGCAAACGGTAAATC  
CGGATGGAAGACATAGCAGCGCATTGTCAGTTGCGATATTGGCAGTGTTTTTACAGTTGCGCCAGCGAAA  
GAGATCACCGTAGTTACAGTGGTCACCGAGATGGTTGTCGTGAGGCTCAAATTCAGCAGGCCCTGTCTTCT  
TTGCTGGGATCTTCTGTACGACCTCAGGGGACAGGTTCAATTCGAAGATTCAATTCAGGCTCGGTG  
AAACTGGCATCCTTCACATCAGCAACTGGCAGTGGCTCAACGGCAGACACTTCGAGAGCGATAGTTGAGC  
GGGTTCAATGGATGCCTTAGCTGACTCAGCGTCGGCCAACAGATGTTCCAGATCGCGACGACGACGGGCAC  
AAGCTGACGTGGCACGGACTTCAAGCACTGGTGAATCGCACCTAAATTAGCAGCGGTAGCAACCGAAAAT  
TGGGTTGAAGGGATGCATTTGACGGTCTTGGGGTTGACACGACGGAGACAGAAGTTGAGGTAAGTG  
GTGGTCGTGGTGAACGGTCGGAAATTCAAAACAGGGGAGGGTAATGGTAAAAGACCTTCTCGTGGTCTT  
GCTGAATTTGCGGTTCTTCTTGGCTTGGTTATCGATTTCTTGACTTCAGGGAGAATTTCAACGTCAGCTGC  
TGGTTGTCCATCAGCGTAGAACAAGGCATCAAATGAGCCCTTGGTGCCTAGGGCATTGGCCATACGTATCG  
CTGTTGGTAGGACAGGCCGACGAAGCAAGTGAGGAAGATCAGCGTCAATTCATCTTGTGCAGTTGTTGAA  
TGCTGGAACGTTACTAAACTACCCCTTCAACCCTTGTCTTTTTATAGGCCTCAAAGATATTCTTTTTCTTT  
TCCGTCCTAAATGCGTTAATGTATGCTACAACCTTTCCGTGTTTCTCGAGAAATTTCTTACATGTCTTCAGGT  
TTTTTTTTGTTTTGTTGATAGCATCAGACA

>7 c20736\_g1

GTTGAAACAAAAGGTTTCGCGCTACGTTTTGCCTCAAAGGAAACGATGAAAAGCCAGCCAATCAGATAGA  
GTCTTACTTTTGCAGTCTGACCAATCATATTCGTCAGCCGGGCAACAGAATTTATTTATTGGTTCATGTTAA  
GGGGTTTTTCGCTCACTCACCGAACGGCATCCTTGTAGGCCATTCTGCGTCCGAAGGTCTTCTAATTCCT  
CGTTTACCTCATTAATTCTAAACTTAAAACCCAAAATGCGTGAATGTATCTCAATCCACGTCGGTCAAGCTGGT  
GTCCAGATCGGCAATGCCTGCTGGGAATTGACTGTCTGGAGCATGGAATTCAGCCAGATGGTCAGATGCCT  
TCAGACAAGACTATCGGAGGGGAGATGACTCATTCAACACCTTTTTCTCTGAAACTGGTCTGGTAAACAT  
GTTCCCGCGCTGTCTTCGTCGACTTGGAGCCACCGTAGTTGATGAGGTTGACTGGAACCTACCGCCAA  
CTTTCCACCCTGAACAACCTTATCACCGGCAAGGAAGATGCTGCCAACAACTACGCTCGTGCCACTATAACC  
ATCGGAAAGGAGATCGTTGACCTCGTTCTCGATCGTATTGCAAGCTCTCTGACCAATGTACCGGACTTCAA  
GGATTCTTGATCTTCACTCATTGCGTGGTGGCACCGGTTCTGGTTTACCTCTCTTTTGTGGAACGTCTTT  
CCGTCGACTATGGCAAGAAATCTAAACTGGAATTCGCCATTTACCCAGCTCCCAAGTCTCCACCGCTGTTGT  
CGAACCATACAACTCCATTTTGACCACCCATACCCTCGAACATTCCGATTGCGCCTTTATGGTTGATAACG  
AAGCTATTTATGACATCTGCCGTCGCAACTTGGACATTGAACGCCAACTTACACCAACCTGAACCGCTTGAT  
TGGCCAAATCGTCTCCTCCATTACGGCTTCTCTCGCTTCGATGGCGCTTTGAATGTGATTTGACTGAATTC

AAACCAACTGGTTCCATATCCTCGTATCCATTTCCCCTTGGTCACCTACGCTCCAGTTATCTCGGCTGAGAAG  
GCTTACCACGAACAATTGACCGTGCCGAGATCACCAATGCTTGCTTTGAGCCGGCCAATCAGATGGTCAAA  
TGCGACCCCTCGCCATGAAAAGTACATGGCTTGCTGCATGTTGTACCGTGGTGACGTTGTTCTAAGGATGTT  
AACGCTGCTATTGCTACCATCAAGACCAAGCGTACCATCCAGTTCGTCGACTGGTGTCCACTGGTTTCAAG  
GTTGGTATCAACTACCAGCCACCCACTGTCGTTCCAGGCGGTGATTTGGCCAAGGTCTCGCGTGCTGTGTGC  
ATGTTGTCCAACACGACCGCCATCGCTGAAGCTTGGGCTCGTCTCGATCACAAGTTGACTTGATGTACGCC  
AAGCGCGCCTTTGTTCACTGGTACGTCGGTGAGGGTATGGAGGAAGGTGAGTTCTCCGAGGCTCGTGAAG  
ATCTTGCAGCCCTCGAGAAGGATTACGAGGAGGTTGGCATGGACTCCGTTGAAGGCGAAGGCGAAGGCAA  
CGACGAGTATAAAAGTATTCGATCTAGGTCTTCTGCATTCCGAACTTTTACGCTTCTTCAGATCTATCTCG  
CGAGCTTTTTACTAGCACAGCAGAGTATGCTAAGCGCGTCAATACAAGAATTTGCAAACCAATTACATCTGT  
TTTTCAATTTGAAATAAATAATTTGTTTTAGTTTTTTGTCATTGTATGCAACACAACGCTACTAACGTTGCAAG  
ACGGGTACAATAAAATGCGTGCTTGCCTTAAATTGTGTGGATTATCGTATACCACAATTTCAATTTCTATTTT  
ACTCAACAATTATAATACATTGTCTTTATTACATAATAAAATAAGATTTGAAATTATGGTATACGGTAATCCGCG  
TAAATTAAGATAAGTGCCAAATCATTGTACGTACATTTTATGATCACGCACGGCACAAAGTGAATGAACAGTA  
AAATGTTTTTATCAACCTGGGTGTTGGTATTTAAGAAGAGCAGTAACATCTTTTCTACCAATTTAACTTATGT  
GTTTTGTCACTCCAATCATTATTCAGAGGTAAATTGGCTATTCTTGACTTCATTAACAAACCGCCAGTTGAA  
GCAATGTGGTTAGTAAAGAAAAGTAACATGTAAACATTAAGAAAGCAGTGTCAAATGTTGCTTACATTGAATTT  
CATATGAAAAAGGTAGATGTAAATCAATAACCTGAAAAACAATACATCAATGTTGAAAGTTCCAGCATCCAACC  
ACCATGCAAAAACCCATTTGTAAAGAACATTCATTCATGTATTACCCCTCCAAGAACTTCACAGAACATCG  
ACAAAAACTGTTTCATCTCATTACGCAAAATGAAAATTAATAAAATCACGGATAAGTTAATCGTGTTA  
TCCTATAAACAGACTCGAGAATTGCGAAGCAGGACGCGTCGGAACCTTCGCACGTATTGGAAAAACGATTTCG  
AGCTCTCAGTAGAGTGTGTTGTTAGCAATTATTTAATTTGTGAATTAGTTTATAACTCGTCTTTGCTGGAATCAT  
CAGCATCATCATCTTTGGATTGAGAACCGGCACCGGCACCTTGATAAAGTTGGCGATAATGGGCTGAACGA  
TATCTTCAGCGTCTTCTTCTGTCTCTTGAATCTTCGGAATCAGCCTCAGCATTGTTCTCTAACCACTTGATT  
TCTCATCAATGACACCCTCGATTTTCTTCTTCTGCTTCGGACAATTTCCACCAAGCTTCTCTTTGTCGCCA  
ATTTGGTTCTTTAGAGAGTATACGTAAGATTCCAGTTCGTTACGGGCCCTCGACGCGCTCCTTAAGTTTCTGAT  
CTTCATCTGCGAACTTCTCGGCATCACGGATCATACGCTCGATATCTTCAGGTGTCAAACGGTTCTGGTCGTT  
GGTGATAGTAATCTTTCTTTGTTGCCAGTTCCTTATCTTCAGCCGACACTTGAAGGATAACGTTGGCGTCA  
ATCTCGAATGTGACTTCGATTTGGGGAACCTCACGTGGAGCAGGGGAATGTTGTTCAAGTCAAACCTTGGC  
GAGAAGATGTTGTCCTTTGTCATTGGGCGTCTCCCTCGAAAACCTGAATGGTGACTGTGTGTTGGTTGTC  
GGCGGCGGTGAGAAGATTGCGATTTCTAGTTGGGATGACAGTGTACGAGAGATCAGCTTGGTCATGA  
CTCCACCGACAGTCTCAATACCCATGGTCAAAGGGTTGACATCGAGAAGAACGATCTCACCAGTATCTTGTT  
CTCCGCTCAAACCTCCGGCTTGAACAGCAGCACCATAAGCGACGGCCTCATCAGGGTTAATGCCTCGGCTG  
GGTTCTTTGCCGTTGAAGAATTCCTTGACCAGTGTGTCACCTTGGGAATACGGGTGGATCCTCCAACCAAG  
ACGATTTCAATGTCGGTTTTTTTTCATATCAGCATCTTCAATGACTTTCTGGACAGGCTTCATGGTTGAGCG  
GAAGAGATCCATGTTAAGTTCTCGAACTTGGCACGAGTCAAAGTCTCGGAGAAGTCATCACCCCTCAAAGA  
AGCTTTGATTTGATTCTGACTTGATGAGCCGAGGAAAGAGCAGCCTTAGCCTTTTCAACCTCACGACGAA  
GCTTCTGGACAGCAGGTTATCTTACGGATGTCCTTGCCCTTCTTCTTGTACAATTTGATGAAATGTTCC  
ATAACTCGCTGATCGAAATCTCACCTCCCAAATGAGTATCACCGTTTGTGCGATGACCTCGAAGACACCAT  
TATCGATGGTCAATAAGGATACATCGAAGGTTCCGCTCCCAAATCGAAAACCAAGATGTTCTTTTACCAGTC  
CTTCTGTCAAGACCATAGGCAATTGCGGCAGCAGTTGGTTGTTAATGATGCGCATCACGTTGAGTCCGGC  
GATGACTCCGGCATCTTTGGTGCTTGACGCTGAGCATCATTGAAATAGGCTGGGACAGTTACGACAGCAT  
GGGTGACCTTTTTGCCAAGGTAGGCTTCTGCAACCTCTTTCATCTTGCCCAACACCATAGCTGAGATTTCTT  
AGGGGCAAATACTTTGGTTCCTTGAGAAGTCTCCACCTGGATGTAGGGCTTGCATTCTTTCTACCACCTTG

AAGGGGAAGAGCTTGATATCATGCTGGACAGTATGGTCAGTCCAGTCTCGGCCAATGAGACGCTTGGCATC  
AAATACAGTATTTTCAGGATTGGTAGTAAGTTGGTTTTTGGCAGCATACCAATAAGGCGTTCATTATCAGCA  
GTAAGCAACATAGGATGGAGTAATACGGTTTCCTTGATCATTTGGGATGATTCAACACGACCATTTTTGA  
AGACACCCACACAAGAGTAGGTGGTTCCCAAATCAATACCGATTACAGTTCCAACATCCTTGTTCTTCTTTT  
TTCCTCCTTGGCCACAGCCAGAGCTACAAGAGCTAAGGTAAGCAACAAAACTGCCCTCTGAATCTCATTTT  
CTGTTTTTGAAGTGCAGTATTGAAGTAGAAAACTCAAACAATAAGACGAATATGGATGAGAATGACTAT  
CGAAATTTGCAAGAATATGTGTAATTCGTTTTGCCGGTCTTGAAGTTGACGTAGTAATGACGTGAATCCTTT  
CTCGGTCGGAAT

>8 c16114\_g1

TCCCTAACCGCACAACAAAGATGAAACTCTTCTTGTCATTCTCCTTTTTGCTTCGTGAGCGTATCGCAT  
CAAGAAAACCTACGTGAGGCCTCCCGTGCCTTACGCTCGCCAATCCCGTGCTCGTTACGTTCCCTTTTTTATT  
CTAACGGTGTCCAGCCGGTACGATTACATCGAAGACAATAAGGCTGAAGAAATTCTACCTAGAAATAACA  
TCAACGAGACGCTCTAGGACGTTTATTAGCAACATTCTGACACCGATCTAATTTAATTACGAGAACATC  
TACGATCACTAGCACTGTTTTGTCCACGGTAACACGGCAACGTACACCCAATGCCTACCTACTGGGCAGTTC  
AAAATAGCTGTATTGGCCACCCAGACGCTGATCCGCCCGTCTTGAAGTACGTTCCACCGCAGTTTGGGCC  
CGTCGTCGCCGAGATGTTGCTGAATTTTTAGTAAAAGCCGATTCTGAAATCGACATCCACCCAGCTGAACCC  
CTACCGATTGAGACCAGTGCCGTGGTTGATACCCAGCAGAACTCAGAGAGATTAGCCAGCCCCGGCGGA  
AGTGTGTGATCCAAGTCGGATGAGCTGGTAGAAAATCCCGAGGTCCGGCAAGGAAGCAACGCGTCCATAA  
AACTGGTACTGTGTTACCCACAAGTTACACATTCGTTCTAAAACCTTACATCGACTGCAACGTTGGCTGC  
AGATGGGGGGCTGCTGTGTCGTCCAGCCGGATACGCCATTTGTTGAAACTGATTTTTATTGAGTTCAGGA  
TGTTCTTTGATTTTATTTAAACATTTTCTTACAAGGAAATTTGCCAGTTTTCTATGCCCTTATCTCAAATG  
CATTCGACTTGATTTCCCTCCTTTTTTATTCCGTGATGATGAATAATACACAAGCATAAGTTATACTCCATGC  
AAAAA

>9 c21178\_g1

TTTTGCGCGGAATAATAAGGGAAGTATATTATTACGACTGGTTACATATCGCGAAAACACTGTACAGCCG  
ACATCATCACACAGTCGAAATAAATTATTTCACTAGGCAGCTAATACCTAGAACAGAATTCTAAATTGGGGAG  
AGAAAAGTTGATCTGTTGACATAAGCATAGGTTTCCAATATTTGGGGGGTCCGTTAGAGAGTTTGTCCGAGT  
TAGATTATGCTGCGAAAGTTGGGTGTGAGCTTTGACGTATTTGACTCCATTGTAGGTAATGGTGTGCGTATC  
CCAAGTGAAGTGGACTCCGTTGGATCCCTGGACGAAGCATGGAACGTCGGGACGGGCAACGAAGCACAA  
GGTGCCGATGGCGAGTTCAGTTCGGGGCTAGCTCCCATGTTGAATTCGGAGGAAGCCTTGGTGCTCCGT  
ACAAGTCGACTGGCATGGAGAGGACGGTCTTGGCAGTTTCGACGGCGTTGATGTAGCCCAAGTAGTTC  
AAGTCACCATCTTCTTCTGTTGAACAAGTAGATCCAGCTGTGGAATCCGACGACGACGTTGTTTTCCAATC  
GCTCGAACACGTTGGTGTGTTCCCATCCGCTGCTGGCAACAACCTCCGGGGACGTATTAGACCAGCGGCCG  
AACCAGATGGTGTCAAGTATTGCTTGAAGTGGGCAACATCGGCGCTAGCCTCGCCTTTGGAACGAGGAA  
AGCGTGAAGCTGTTGCATGACACCAGTCTCCATGACGGCATCAATGAAAGCAACTTCTCGGCCAACTGTTT  
TGGAGTGAACGTGTCCTGGATGGTGACGTTCTTCTGGTAGTTGTTGAGAAGGGCCTGGGCGGCAGCGAAA  
GTTGGCTTGGCAAAGTCGGGGATCGGGTGCCTGACAATCAATCGGCCGGGTGCGTTGTCCACCAAGCTGC  
CCGCTGTGGTCTGGCCTTGGAGGTCCAATGTGAGAGTGGCTCCATTGACATCGTTGGTGTGAGGTCTCTG  
GACAGCGTCAGCAATTCATCGTCGGTGTGGGAGTGGCACGGAGACTTTGGCGTTGGATGCACCAATGGC  
CAAAACAAGGACTGAGACGATGGCGAAGAGTTTTCATCTTTGTGAGAAGTTGGGTGCTGACTGGCTTTGAG  
AAGCTGGTACTTCCACTGTCCCCAGCCAGTCACGACCCAAC

>10 c15033\_g1

CGGAGCCTCAGCTGGAGCGCTAGTATACACAGGGTCTGTGATTCTAGACGCTACGGCAATGCAAAA  
GGGACGCGCGCTTTGCCAGCGAAAAACCCGAGGCGAAGGACAACCCCGCTAGAGGCCGATACAAGGCG  
ATGCAAGTACCAACGATCAGCGGCCCTACCAGTGTGCTCTACACCGTCCCGTATATAACACCTCGAATCAGA  
ACTCTTGCGAACGCGCCAAATTTCTTTTTTAAGGCACATCTCTACCTTCTCCGTTCTCTTTTTTAACGGT  
CTCTTGTAATCAAACAAATCGAGATACCTCGATTCTCTTTTGACGCTCAACAACCAAAAAACAACACAC  
CTCAGACAAAATGAGTTCCAAGGAAGCAACGAAAGAAGTTGAAGCCGACGAAGTCATCGCCGCCGACGCC  
AAGAAAGACGCAGTCAAAGGCACAAAAAGGCCAGCAGAAGACAAAAATGATGACATCAAGAAATTAAG  
AAAGCTGAAGAGAACGGTGATGACGAAGAAGCCGAAGATGAAGAAGAGGCAGAAGGCCGAGGAAGATGA  
GGAGGAGGAAGACCTGCCGAAGGAGAGGAAGACTTTGATGAAGAGGGCGAAGGAGAAGGTGAAGGT  
GACGATGATGATGAAGGAGAGGGAGATGATGACGATGATGATGCGTAAAAAGTGTGTGACAGGAGAAATTA  
CTATTTTTTTTTCTTTTTTTGGCTTCGGTCAGGGTCCACACTTTTTGCGCATGCGTTACGTGCTCAGCGG  
GAAAGCAGCCGGCACCGGTCCGAATTTTTTTTTGTGAATTTTGATTTTCATCTCTCTGTCTGTCTTTATAC  
ACTCCCCTGAATCATGATACCTTTTATCTACCTTTTTTTTTGCGCTCCCAATTTTTTAATACCGAGACACAC  
ACACGAAAAAACACCTCATAATGTACGAAAAAGACTTATCAGAGCAGCCGCCCTCCATCTTTAATATGAT  
TTATGTCATGTGTGTGTGTGAACGAGAGCGCGAGCCCAACGCCATCTTTTTCTCCCTCTAAAAAA  
TTTCGGTCGCCCTGTCATTTGTATGAACGTTTTTTCAGTTTACTATGGAAAAAATCACTCACAAAGACACAA  
CCCCACCACATACAAACATTACCACCACCATCCCTGATCTGTCCAGCCCAATTTTTTTTTCTCCTTTATTTACT  
GGCGGGAGATTTTTGAATTAAGAGGAAGAAAAATTTTTGAGCGGTGCCGTGCTTTTTTTTTAAGATTT  
TCTTTAGGATGTCTTTGTAAGGTAGGGGAGACAACCTATAGAAGAATAACACGAATCAGATACAAATAAC  
AATCCTGCATAAAGACTAGAAACCGTCTCCTCCCCGTACATGAACGTAATGTGTGTTAAGTTTACCGTAC  
AACTTTTTGATGGCATCGTAGAGAGGAAGAAAAACAAACAGCGATGTAACCTTTTTGATTTCCGGTAGATT  
TGTTGTAAGTCCGACATTTCTTTTGACAGATTAATAAACCAAGCTGAGCGCTCAGGATCATTATCATCAAAC  
TCTCCTCGCTACCATCTCCTCATTACCTTTAATCACCACCAGTATCGTCGTTTATCGTCCGACTATCTTTAT  
TTTTGAAATTTTACACCTCGCCACCAATTTCTGGCCAAACTCACGATGTCAATTTGAAAATAATAATAAAAA  
ACAAAACAAGACAAAAGACTTGCAAAGCGTTGGGCTCGTTTTGATCGGCAGAAAACAACTAATAACGATGA  
CATTGAAAGACAATGATCATGTAACATCTATTGCAATTTTACAGTGACGTAAGTACTTAATCGTTACTGGGTT  
TTACTGATCGCATTACGAAAACGTTAGTACAAAAGAACGACTAGCTAATGTAATAATCATTGCTACGGGC  
TGCACAAATAGTTGCGTTCAGTTCATAAACATCACTACATCAATTTGAAATGAAATGAAAAATCATACTT  
GAATTTGTTGGCAAACCGTTGGACCGTTGTCGATCGCCTACGTTTTTTCGTGCGTCTGCCTACCCAATAAGT  
TATGGGGAATGTTGTTGGGTTTCGCGAATGTTGAATTACTTCGTCTGCAAATCTTTCAAGTTCAAAAATCT  
ATCGTGATTGTTACAGATCAAGTGTACTTTACAGCTGTGTGATAAATCAGCTGATGTGTTATCATATATTTGATC  
AAAGATAAACATTTCTTTGTTTCTTTTTGAGTGAACCGTTACGTGTAATCTGGATACCGTCATACTTTGT  
GTGTGTTATAACCAGAGGTATTTTTCTGACAACTCTCAGAAATGAAACAAGATAACAACAAGATTGAGTT  
TTAAAAATTTGAGATATATTTACAGTTTGAAATCGTCAGCCAAGTAATGTAACAAATAAAAAAGAGAGAACA  
AACAAACAAGAATTTGCCACAGACATATTTACAGTATGGTACAGAGTAAAAATTTGTAAACAGTTACATTG  
GCCAATCAAAAAACAATAAAAAAGAGAGAACAAGACACATGAATTTGTAACAGACATATTTACAGTGAC  
AGTGCAGACCACAAGTGGTGCATCGTAGAAGTCTGTTGAGCTCTGCAATCATCATCTCTTTGCATGCGCA  
GAAATAGCAACAAGACATAAATGATCAAACAAGAGCTTTCAAGTGTCGAAGATGCTGATCAAAGGATGTG  
ACCAGTGTCTGGATGATTGTCTGTACTCCATCGAAAAATGATTCCAAACCTGCATCGATGTTTAGGCAGGAACG  
ACATCGACTTCTTCGGGGCCAGAATCAAAGGGGCTCGAGTGATGCGTGGTGGCAGGAAGATGTGAGCAT  
CAGGTCCCAAAGCCTCTCGTTGAGCACGCCAGGCAGCCGAACGTTTCTTGTGGTGTAGATGTTACGCCTTT  
GTTTTGCAGTCAGCTGGGCGAACCAAGCTTCGTGATCCTGGCGGTGCGACAGGTGCAGCCACTGGAGC  
AGGTGGAACATCGGAAGCCTTCTTTCTGCGGCTACGCTTCTTCTCACAGGAGCAACTTCAGAGGGAA

CAGTGTCTCAGCAGCCGAAGCTACAACGGGAGGTACCACTTCATCCTCTTCAGCGGCTTCAGCGGCTTCA  
GCAACCTCTGCAAGAACAGGGAGGTCTTCAATCACCTGTGCAGCATCTACCTCAACAGCCTCTAGAGCCGG  
AGCAACTTCAACAACCTTCGACGACAGCTGGAACCTTCAACAACCTTCGTCTGCAACTGGAATGACATTAGCTGC  
GTTTTAGACGGAGCATCTTCAACAACGGGGACTTCAACAGCTACATCTGGAACCTCCTCAACTGCGTCTTG  
AGATGGGACGGCTGGAACAGCGACAGGAGGAACCTCCATAGCTTTCGGAGCCTCGTTGATGGGACTCTTC  
CTTTTCAGCACAGGTGCGAAATGGCTGGGCGTAGTGGCTTTTTGGCACAGGATTGGCGCGGAAGGGTTTTCA  
CCAATTCTGGAACGGGGTTGGTTTGAAGACTTGGCACCGGTGACAATGGGCGATGTCTTCGATTTCTGA  
TTCTCCTGGATCAATTTGCCCGGGCAGCAGCGGATGGAACAGCTGGTCTCCTGCAGTCAACCTTGGATTG  
GACGTGGGCAAACCTGCTTCTCGCTCCTGGAAGTTTTGGAATTGGAGAATTCATCTTCAGATCGTTCGCTAA  
GCGCTTGGAGTGATGGAGTAAATCGGCAGAGATAGAGTTTTCAACAAGAGGTATGTAACTCGAAAAAT  
GCGATAATTTTTGAGGGGGGGACGTTTCTATACCCGAATTGAGGGTCATGTTACGAACTCTAACTCAGG  
ATTCTGCTTATTTTTGCGTTTTTTATTTGCATTTTCATGTGATTACGGGACTTGAAACGTAAAATCAGTTCAA  
ATACATTGACAATTGATGTCAACGGTTTTTAACATCGAATTAATTAAGAAAAGTATTATTTAAGCTTAAAAT  
GTACGTGGGATTCATAGCTTTATCAGCTCGAGTCGATTTCAAATTAGCGATTGCGCGGAACATGTGCTGTTGC  
TATGGCGTTTAAATATAGGCTATGGTAACGGTTATTGCGTCGTGACCTTGAAACCGA

>11 c16911\_g1

GGCTCTGTTTTCCAACGAACAGGGTGAGTGTGTCTCGAATTACCCTTTATCATACCGAATAGTGGTTACGTGT  
TTGTGTGATGCCTGCGAAAGTCGATTCTGAATCCACACATTTGGACTTTTATCTTTAACCTTGATAGATAAT  
CAGTATAACCCTGCTTCCGGGAGGGCTACTGTGATTCTTTCTCTAATATTTGACTTGTTTTTCAATTTCAATT  
TCTTGTGATGGCTACTTGAGAATATACCTATTTGATGGAGTTCGGAAATAGAATGGGTAGGAGGTAAAATTC  
TTTTACTTGTAGGACCTTAGGAGCAACGTCATACGAGCCAATAATGCACCAGCTCTACACATAGGACTCAAGC  
TCGAGCTATTTCCGTTTCCCTGCTTAGGACCGTGATTAATCAAACAAAAAAAAAAGCAAAAAGAAGTTTG  
ACTTTATGCAACTATATTTTCTCTCGTTTCATTGTGCATACATCTAATCGAATTAACCTGCCTGTCTAGATAAT  
CTTTAGGGATATCAAACAGCTGATGTTGCTCTAGAAAAATGCTGACCCTTCTTTGGATTGAATTGAAAGTAC  
CGGCATGTGTCATTGCTCTTTATGTTTGATCTTGACTCTATGTCTTGATCTTGCTGTTGCCGAGCCAGATCATA  
TAGCGCCAGTAAAGCATAATTTACGGCGAAAGCCATTCGTCGTTGTCGTCGATAGTTCATGACTTTCTCTCAC  
TCCAACGTTGATCAGCGTTCTGGCTGGTTAGGGTAGATACAGTTGTTGGATTTAGATATTTAAATTTAATTAT  
GTTTTAGTCGTTTCACTTTCCGAATCGATCTCCTCTCTCTCGTTGTCGGAACCTGACTGTGCCAATATCG  
TCCTTAGCCAATCGACTTCGTTAGTGAAGTTAATGCCATCGATTTTTTTTTGTTTCTTTCATTTTTTCCCCTCC  
AGGTTTTATTACGTGCATTAGGGTTTGTGGCAGGTTAGGTTCAACGCCACCTGTCTTCAGACGAACGAAC  
ATAGCTCTAGGCTTCAAAGTTTCTTTACTGGTATTTAACCAAGTCAATCTTCTCCCCTTCCCTTTGTAC  
CTGAGCGGCTGTTCAAGTCTGTTGAAAGAAGCTGCTGTCAACGTGGCCTGTAACACGCCCGTATTTTCTTG  
CTTCATTTTTCGACAGTTGTGAAACTAATATCCCTATCTCGAATTCAGTATTTGTTAAACCGTACAAAGAT  
AGAGTTGTGACCGGTGCTATTGCTAATCAGCTAGTAAACCATCGCTCTTTGTGTTTTCCATTTCTACTGTGT  
TTCCCTTTGTGTTGGATAACAGCTGGTAGTGCAGGTGCTCAGGCCGTGTGCCGGTTGACCTCATTTGCTCAT  
CTTTTTCTCCCTACTTTTTTCATCTTCAGTCATCTTACGGGGTTTTGATTTTTTAAACTTAAAATGGGTGCTC  
GTAATCGTGAAATTAATACAACCTGAGGAGGTTTACGAATCTCAGGGTCTGTTGTGGATTGGTGCCTGGC  
GCGATCCGCGTAAGAGCGGAATTGCTGGGGGCTATCCTAGCCATCCTCCTTCCCTGTCCGTCGTCTCGGT  
CGTATCTGTCATCTCCTACTCAGCATTGGCCGTTTTGTGCGGCACCCTTCTTTCCGACTCTACAAGAATGTGT  
TGCAGGCCGTTCAAAGACTCAAGATGGACATCTTTCAAGGAATACTTGAAAAAGATGTTACCGTCACA  
ACGGAAAAGGTGCACGAAGTAGCTGATTTGACTGCAGCCAAATTGAATGCAACTTTAGTCGAACTGCGCCG  
ATTGTTCTGTTGAAGATTTGGTGGATTCCGTCAGTTCGCACTCGTCTTGTGGGCCCTCACCTACGTTGGT  
TCCATGTTAACGGTCTTACTGTTGATGTTGGTCTTTTACTTTCCCAAGGTGTACGAAA

CACACCAGGAAAAAATCGATCAGAATGTTGATCTCGTGAAAGGCCAAAATCAACGAAATTGTTGACAAGGTT  
CAGGCTGTGTTGCCAATCGGCAAGAAGGCCAAGAGCCAATAAACTGAAAATTTAGAATAGCGAGGCTTGT  
GTTTCGGCCCCGTCCTCGGTGTGCTTGGGTCAGTCGGGACTCGGTAGACTTGACGAGAAGAAACCTTTACT  
AGTTGATTTTTCTCCTTTCTTAAATTGGTTGTGGCTGCTTTATCTCTTTAGACCTATTTGCGAGAAGAGAA  
ATAACTGGTCATACATTTTCCTTTCTCCTATCCCCCTATACTATACTTGGCCTGTAGATGAACAACCATAAC  
CGTCATTTACATCGGGCGATCGCACTTGTGTGTGCTCCATAGCAAATTTCTTTCCTATCTCCATCACCTAGGG  
ATTTTGAAATTGCGAGGGCGTCATATGTTGTCAAAGACAATTGTTGGGATTTCAAGGGCTAAAAAGAAAG  
ATACTGAACTAGCGAAATGCCCTTGGCTAGAATTTGAGTTTGTCTACCTATAATATCCTCTTATAACTACTCTTT  
GTGTTGTCATGTAACCGATTCTCTCAACAAGTCTAAAAACATCATTTTATTGTCTTGTGAATCAGTGTGTGGTT  
TGTTGACACGCTAATTTTGTCAATCTCTGAATCTCAGTGTGAGAAGAGCTGTTGTAGTGTTCGCTGTCCCG  
GCATGTGTCAGTCTTACTCGATACAGAATTTAGCCAGAAAGTTATACGCGCTTCTCATCTGCTTTGGT  
GGCACTCATGAGTTCCTTTGTCAATTCTCTACTCATATTTAGATAAAAATTTATTGTTATATTTTTTATCTTTAA  
GAGCTGAAGGTATAAAGCCTCTTTTCTACTAATAATATATAGTACTGTGCTCCTTGTCTGCTGCTGTTCCACCTA  
TTCCCATCACACTTTGGAAAATAAATATTCAACGTTCAACCATAAAAAAAAAAAAAAAAAAAAAA

>12 c21985\_g2

CTACGGAGCTCACTTGGTCAGAAGTGCCTGTGACTACCAAACCACATCGTTTAGTTTGTCAAATCTCAAAGT  
ATTTCTTTTAGCGTGAAGAAAATGTCGTGGTGGTCCAATGGAATCTTCTGATGGCCTATTTTTCACCGC  
CAGCCAAGCTTATGGTCCACCGAGACAACATCAGTACGTGTCGAAGATGCAGCATATTACAGACGAGGTTA  
CCCACAACCACCATAACCACAACCACCATACCCCAACCGCCATACCCACAACCACCATAACCCCAACCGCCA  
TACACACAACCAACGGCACCAACTTACGAGCCGGTCCACTACTGCCCAAATGTTGCTGGATTAGAGACTCGA  
TGCCGTCTACTAAGGATTGTGCAGTATGGTATGACGAAACCCTCGCCACGCCATACACAGCTTGCCAATTGA  
GTGATGGAATGCAGGATCCTGCTGTCCCGACATTCCTTCTAACACTAAGGGTACGCCATTCAAAGAGCCAC  
CTGCATGCCAGGGCGAAATTCAACTGGACGACCAGTTGGATGTCTCGACGTATTTTCTGTGAATGCAGCTG  
CTGACGCTGGAGAATTAGAGCTCAGATTACACAAAGAAACAGCCAAACGTCTCAAGGATAGCGATATTGTC  
GTCCAAGCCGCTTACCCCGTGCTACACATGCCGTTTCTCCAACCCATCAGATCACGCTCGCGTAGTAAACA  
CAGAAGCATTGTCGGTGTCCATACTGCCGTGTTCTCGTCAAAGATTCAAATCAAACCGAACAGGTTG  
GCTGCGCTTGCACAAATTCAGCTAACTGACACCGATCTGGATAAAAAATGTACCTCCATTAGCAAAGCCC  
ATTGTAAGTACGACCAATTGAATCCCCCTACCGAACGATTGACGGTTCTTGAATAACGAAAGACTTCGT  
TTGGGGCCGTGCAGCCACTCAATACCATCGCATGCTCGTCTGATTACGCTGACGGTGTGTTGGCTCCGCG  
TACCGGAAGAACGGAATAGAATCCAGTGCCGTTTGGTATCTACTACCTGGTTCGCGATGAAGACAA  
GCCTAGCGAGTCGACCACTATCTGTTTCATGCAGTACGGACAATTTCTAGACCAGATATCGTATCCACTCCA  
GAAATGACGAACGAAGATGGAACACCAGTTACCTGTTGAGCGAGGATGGAAAACATCTTGAAAACGAGG  
ATCGTAGTCACGGCAAATGCCTTCCATCGACGTCCCAACCAACGATCCATTTTTCGCCAAATTTGGCCGAAC  
TTGCATCCAGTTTGTCCGAGCTAGCCTTGCCTGCAGAACCGATCACCAACTGGGTCATGCTACACAGCTCAA  
CGACAACCCCATTTCAATTGATTATCGCTCGTCTATGGCTCTAACGATAAATTAGCAAGTGAGCTTCGGACA  
CGAGTTAACGGTGAATTGAATGTCAGCTGAAACAAGGCAGAGGTTCCACAAGTTTACTTGTACTACCACC  
AAACGAAGGTAGTCTCTGCATGCACCTTGCACCTTACCCAGAGAAGTGAGTGGTGTGAAACCACCGTCAA  
ATGTCAGATGCTTCAAAGCCGGCGATGGCCGTCGACGTAACCCCTAATATGGCCACCTCGCAAATTTATCTT  
CTTGCGAGAACAACAGACTTGCCAAAGAATTGGCACAGTTGAATCCATCGTGGGATGATGAGCGTCTCT  
ACCAGGAAGCCCGCCGATTTTATTGCTCCAGGCTCAACACATTACCTACAACGAATGGCTACCTATCCTTCT  
CGGCCGCTCGAAAATGGCCCAACTTGGCCTGTTGCCATTGCAGAGTGGTTTTCAGCACAGATTACGATGATCA  
CCTCAACCCAGCATCTTGAGCGAATTTGTTGCCGGTGCCTTCCGCTTCCGGTCACTCTATGGTGAAGGAAA  
AGCTCTAATGGTCAACCAACAACGGTCCGTTGAGGAAGATATTAGTTACGTCATCACTTTTTCAAACCGCA



AACGCTCTACTCTGGCAATCTTGATAAATACCTCATCGGTTTGGCTACTCAACCTACTCAGAAAGTGGAT  
CTCTCCTTCACAAAAGAGCTCACTGAGCACTTGTTCGAAGAAACCGGCATGGGTTTCGGTTTGGATTTGGT  
GGCTCTCAACATTCAGCGTGGGCGCGATTTTCGGACTTGAAGCTATAATGATTACCGTGAACCTTTGTGGTATT  
GGCCGAGTCACAATTTACGATGATCTCGCCGATTAATTGATCCTGTGGTTATCGAGAACTCAAAGAAGTTT  
ACACTAACGTGAACGATATTGACCTGTTTGTGGAGGCATTAGCGAGACAAAAGCAGAAGGCGCTTATGTA  
GGCCCCACCTTCCAATGTATTCTGGCCGACCAGTTCTTGAAACTGAAGCGAGGAGATCGTCACTTCTACGAC  
TTGGGCGGACAACCTAGTTCATTCACCGAAGACCAATTGAACGAAATCCGCAAGACAAGTTTGGCCCGTAT  
CGTTTTCGACAACAGCCAAGTTAACGACATTCAACCCATGGTTTTCAAATGCCATCTACCATCAATCCTGTC  
GTGAGTTGCCAATCTTCTCTATTCCCCGCATGAGCCTTCTCCATGGCAAGAAGCTACTAAATCCAATCCAC  
TGGCTACTACGATGAGTATTACTAGAACGTTCTTTCTGAAATTCGGATTTTCGCATGGCCAAATGCTGATAGCAT  
TAACACTCTTGACTAGACTAGGAAAATATACATTGAACAAATTGGAAAAAAAAA

>13 c16323\_g1

TCGACGATTGTAGTGAAGAACGTTGGGTTTGTCAATCAGTCCACAGCTTTCGTCTGTCTGGTCTTCTTG  
CAAGTACCTGACTTCGCGGCTATTTCACTCTTCTTACAAGTCCATTTATCCATTAATTCATCAACATGCGTGA  
AATTGTCCATCTTCAAGCCGGTCAGTGCAGAAACAGATCGGTTCTAAGTTCTGGGAGATCATTCCGACGA  
ACATGGAGTAGATCCAGAGGGCAAATACATTGGTGACAGCAACCTTCAACTGAAAGAATCAATGTTACTA  
CAATGAGGCTTCAAGCGAAAGTATGTCCCCGTGCTGTTCTGGTTGACTTGGAGCCAGGTACCATGGACT  
CCGTTTCGCTCTGGACCATATGGCAGGATTTCCGCCAGACAACCTTTGTGTTCCGGTCAGAGTGGAGCTGGTA  
ACAACCTGGGCCAAGGGTCACTACACCGAGGGTGCTGAGTTGGTCGACTCAGTCTAGATGTTGTCGGTAAA  
GAAGCTGAAAATTGTGACTGTCTCCAGGATTCCAATTGCTCATTCTTGGGAGGAGGTACCGGATCTGG  
CATGGGAACCCTGCTCATTTCGAAGATCCGAGAGGAATACCCAGACCGCATCATGAACACATTCTCAGTTGT  
TCCCTCTCCAAAGTGTCCGATACTGTTGTGGAACCTTACAATGCAACCTCTCCGTTACCAGCTGGTTGAA  
AACACCGACGAAACCTTCTGTATCGACAACGAAGCGCTTTATGACATCTGTTTCCGCACCCTTAAATTGACCT  
CTCCTACTTATGGCGACCTCAACCATTTAGTTTCGGTCCACATGTCTGGAGTCACTACCTGCCTCCGATTCCCA  
GGTCAGCTCAACGCTGATTTGCGTAAGTTGGCTGTCAACATGGTGCCCTTCCCCGTCTTCACTTCTTTATGC  
CCGATTTGCTCCTCTGACTGCCCGTGGATCTCAGCAGTACCGTGCATTTCCGTCCAGAACTCACCCAAC  
AGATGTTTCGATGCCAAGAACATGATGGCCGCTGCGATCCTCGCCACGGCCGTTACTTGACCGTCGCCGCCA  
TCTTCCGTGGACGTATGTCCATGAAGGAGGTGACGAACAAATGTTGAACGTCCAGAACAAGAAGTCTGCG  
TACTTCGTCGAATGGATTCTAACAACGTCAAGACAGCCGTTTGTGACATTCACCAAGGGGTCTCAAGATG  
GCCGCCACATTCATTGGCAACTCGACTGCTATCCAAGAGATCTTCAAGCGCATTCCGAGCAGTTCACTGCC  
ATGTTTAGGCGCAAGGCTTCTCCTCATTGGTATACTGGTGAGGGTATGGACGAGATGGAGTTCACTGAAGCA  
GAATCCAACATGAACGACCTTGTTCGAATATCAACAATACCAGGAAGCTACTGTGATGATGGTGAATTTG  
TGGAGGATGACAACCCAGAGGAGGAGACCGCCTAAGGAGGAGCAAGTTTCAATGCGTGAACGAAACTTG  
GAAGTTTGATTGGGGAATTGCCAGAGTGGACGCAGTAATTTGGGAGAATGTTATTAGTTGCACCAATTGA  
AACCAGTTGCTGTATCCTTCGTGAAACAGTTGAATGCTAAAATTTAAAATTTAATTGGCAAATTTCTTAACA  
ATTCATGTTATGAAAATTTATTAGTAATATTTGGAGTATTGTTGAAGCATTCCGGTGCCAAATAATTGACA  
ACATTGCTTGCTTCTTTGGGTTTTAACCGCCACCCTTCTGCTCATTCTTCTGCGTCGAAATTTGGAATTC  
TGCGAGTTGCATCCTTATGAACAATATGAATAAAATTTTGAAACCCAAAAAAAAAAAAAAAAAAAAAAAAA

>14 c14544\_g1

TGTCGTTGGTCCGGATCAATTCGACAACCTATTCGAGACCCATCAGTCTTCGAAGAGCTACCGAATTGATCCG  
GACCAACGACATGGCCATCCAGAACAACATTGCTGTCTCTATGCTAGTTTTAGCTGTATGCTTGGCATCAGCT  
ATTGCCTCCACCCACCAGGGATCCAAAAGAGCTTCTGATTTTCCGCATTCCTACTCGCCTTTTTATCGTGT

GCCGTCCATGCAGTCTCGTTATGGCCCGACCCAACGCCAAACCAACTACCAATTAACCCCATGATTGGCCA  
ACAAGGTCTGGGTCCATTTTTTCGGCTATTTTCAAATCTTTTGA CTCAACCATGCCCGGCTTGCCTGATTGC  
GAAATCTGTCCCGCTGCGAGGTCTGCCAGTAGTCCCGGAAATGCCTCCTCTGGAGAAATTACAACATGC  
GGTGAAAATATGAGGCACCTATGTCGGCATCGCTTAATGGCACTATCAAGCTGAACATTGCCCTACCGGC  
ACTTCTAACCGGAAAATTTGCCAAGTTGGTTTGACGGCTTTTATCAAATACCAAAGTCAAGATCAACTGC  
GGCAGTTAGGATCTGGCGTCACATTGAACGCTGCTCCGCTCTCCAACCAGTTACAGTAGCTGAGGCTAAC  
AAAGATTACCTTTCCAAGGATAACTTTCTCTTCGTGATTTTCAACAACGGTGCAAGCCCGAGTTCAACTATTG  
CTGCCGAATGCACTTGGACAAATGTTCCGGCGTAATACGTGAACATTGATTTGAAGTGGCTTTTCAGCCATCT  
ACACCCTTTTCAAAGTAAACATGGACACATCGTAGCACTTCTCGAAACATTTGACATGATGAATTGCTTTACA  
GGATATATTCAGTTTTCTGCTTAACGTATGAAAAGAGTTTTGATTGTTTGTGCACTTTATGAGGAATTTTCGG  
GAATGATGCAACACACTTTGGTTTTTTATGGAATCATGCTTTTTTCGTCTGAATATTTAATACAAGCATTGAAA  
AAAA

>15 c31684\_g1

TGGTAGTTATAATAATTTAAATGACACTGAATCAAATATTGATTGTCTTACCACCAACGGTAAGCTCCGTCTTA  
AAGTGATGTCGCGTGTGAAACGTTTTGCGGTAGTCAGACGTCACGATCGCGGAATTTCCAACGAACCCCA  
CCCATTGTCAGCTCCCTAGTTTGTGTTGCCATACAAATACAAGTTTCAAGCAATGCCCTTGCCTTGAACGTTG  
TTTTAGATTGCTGCTACCAATCGAATTCTCGTTTTTCCGCAGTGCCAGTGAACATATGACGGGATGGCAAAAA  
GGTGTGGTCCATCCAAAACAATGAAAAGAGACAACTACCTGTAAAATTGAATCTTGTCAAACAGGAATTCAAG  
GTTATTAAGATCTTCTCGTGAAGGATTAGCTTTGACCGTGAGTCAAACAAACAAAAAACGAACACGCGG  
AAGTTAACTGCAGTTCAAGTAAAGGGAGTAGCCACTTGCCCACTGGCCAATTTGAACGATATAAAATGAGG  
ACCGAAGTTGATATGGGCACTTGTTCACCGCACCTTCTGTCGATTACAAGCGTTCAACATGAAATTCCTGAT  
TTTGAGCGTCTTCTTGGCTTGCCTCGGCCAGTACATCCCGTACAGCCAATGGTTCGCCGTACAATCCCA  
GTTTGTGAACGACCTGCACTCGAAGAGCGTCGATTTGAACAAGGACGGCCAACCTGACGTCCAGTCTACT  
CAGCTGTTCTGCATTGCTGCCAGCTACTACCCTTATGCGGATTTGGCTTCTCGCACTGGATACCCATTCCCT  
TACGGCGCTCCCTTCACTACCCTTTCGTCCAGGCCGCACTTCTGTTGTCGCCAATGCTGACCCTGCTACCA  
CCAAAACCACACGCGTAAGCGCCAAGTGCCTTCTGCCCCACAAACCATCGGAATTTCTCAATGATTTG  
CATACAGCAGCGTCGATTTGAACCAAGATGGACAGCCCGATAACGCCGTATTCACACGCACAGTTGCCCAT  
TCACTGGTGGCGATTACCTATCCGTCTTACCCGGATACTACCCGGATACTATCCCAACGTCTACCCATTT  
GGCAACGGATTCTCTGCTAAACATGTCACCAAGCAGTCCACAGAAACCACCCGAATGAAGCGCTGTTATCT  
AATTTTTCTCGTCTATGAAATATGTTGCTTGTGCTGTTATAATTCTTCTCCTAGCGAATACAAATTTTGATTGC  
ACGTCCGGTCGACTCACACTTA

>16 c9802\_g1

GTTAGAAACCCTTCGGGTAATTCAAACAACCGTGATTTAAATCTCATTGCTTTCTTTTTCAATTTATTTATTA  
TTATTTCTATCATCCGTGATTCTTTTTTTTTACTAAAATATATGAATGATTTTTTTTTCTTTTTCGCAAAT  
CGTTTAACTTCTACTGTTCCGTCACGGGACAAAATAAAAAAGAATGAATTGCTCACACATAGAATAACAACA  
CCAAACATTTCTTTTTTGAACATATTTGCAGTTGAACATGCGGGGAGTGTGCGCGATTATTCCATGCGTGT  
TTGTCAGTAAAAATGTCAAAAAAAAAAAAAATACCGTAAAAAAGTATGTGTTGAAAAATCATAAAATCAGTGA  
AGCTTCACGACGACGAAACGGGTTGTGAGGAGTCTGACATGTCGGTATAATAACACATGGAACAAACAAAA  
CAAAACCCAAAGAGAGAGACAGAAAAGATGTATGGGATGGGAGACGTAAACAAAAAAAAAAAACTAAAAAA  
GATAATGGTTTTGAATAAGGCAATTGGGACCCAAACATGGATGTCACACACGATACATTTTTATCATCAATTC  
GTCAAGGAAAATGAAAATAAATTAATAAAAAAAAAAAAAATGCAAGAGACTGTATCGTTTCGACTGTCTCGATGT  
CGTTTTCTTTTTCCACCTGCGAGTTGAATGTTGTTGACGTTTTAGACTGTCTGCACTTGATTGTTATGCG



TCTTCTTTAGGGATTTTCGCAAACGACACATTCAGCAGTCGTGAGGAGAGAAGCAACTCCAGCGGCGTCAGT  
CAGAGATGTACGTACTACTTTGGTCGGGTCAATAATACCGCGTTCAATCATATTGACGTACTCATTTTCGGAGC  
GCATCATAACCGATAGACGCTTCCGAATCCATAACCTTGCGCAGCAGACTGAAGCATCAACCCAGCATT  
CTGGCAATAGTCATGCAAGGCATCTTCAATGCGCGACGAATAATGTCAATGCCAACTTTTTGATCCTCATTTG  
CGAAGGGTAATTTGTCCAAAGCTGGGATACAACGAAGGAGGGCAGTACCACCACGGGAACGATGCCTTC  
CTCAACGGCAGCTCGTGTGGCGCACAAGGCATCGTTGACACGATCCTTTTTCTCGTTTACTTCTACTTCGCTT  
GAACCACCGATCTTAAGAACAGCTACTCCAGACGCGAGTTAGCTAGCCGTTCTTGCAATTTTTCTTCTCAT  
ACTCGGACGTGGTTTCAGCGATTTGATCCTTGATCATAGTAACACGCTGGGCAATGCTTCTTTTTCGACCTTT  
TCCTCTTAACAAAAGGGTGTATCTTTGGTGACAACAACTTCTCCAACCTGGCCAAAGTCATGCAACTGAAT  
ATCTTCGAGTTTGACGAGATTTGCCTCATCGCCGAAGACCAGGCCACCAGTAGCATTGGCCATGTCATGAAG  
GGTGTTTTTGCGGTTGTCCTTCAACAGGTCCTTAAACAGCGACAACCTGGAGTCCAATTTTCAACCTGTT  
GACAACCAGAGTACTAAGAGCTTCGCCATCGATGTCTCCGCAATAATGACTAGAGGTTTTCGGTGTGGTT  
TGCAAGCTCTAAAGCAGGAATGATAGACTGGATTGATGAGATTTCTTCTCGCTCAGTAGCACTAACGCATCC  
TGATATTGCACTTTGGCGCCCTTTGCTGTGTTGATGAAGTACGGCGAAATATAACCGCGATCGAATTTTCATGC  
CTTCTATCACTTCTAGTTCATCAATCAAAGTTTTGCCATCTTAAACAGTGATAACTCCTTCCCGTCCACTTTGT  
TCATTGCTTGGGAAATCAATTTTCTACTGATTCATCACCATTAGCTGAGATCGTGGCAACCTGAGCAATTTCC  
TCTGGAGTGGTAACTGTTTTGACATAGCTCGCAAATTACCAATTACTGAATCAACAGCAAGCATGACACCAC  
GGCGTACTTCAACAGGGTTAGCACCTTAGTAATCTTTCAAACCTTCTTTGCGATTGAGCGGGCCAAAA  
CTGTTGCAGCAGTTGTTCCATCACCAGCTGATTCATTTGTGTTATTTCGCAACATCTTGAACAACTTAGCACCA  
ATGTTCTGGAACCTGTCCTTCAGTTCATACCCCTTTGCTACCGTCACACCATCCTTTGTAATTTTTGGTGATCCC  
CATGATTGCTCCAGAATAACATTTGTCCTTTGGCCCCATTGTGACTGCGACAGCATCAGCTAGGACATCTA  
CTCCTTGCAACATGGCTGCTCTGACTTCGGCTCCAAAACGCACATCTTTGGCATAAGCTCTGTACGATTGGG  
GTGCAATTTGACGAAGAGCTGCTGTTCTCAGAAGACTTGGTAGCCGATACATTTTTTAAAGTGATTTAAAGTA  
AATTTGTCTGAGTAGATCCCACGTGCAACGCTTGGCGACGATAGTACGACTGAATGTGAAACAGAAGACGA  
GCGGTACCGTCCCTAAAATAAAAGAGCCTCTCGCCGTCTCGCGGAAGCTTCGAGATCACCCCTTACCTCACC  
ACTTACCAGTCAGTCACCATAATAATGTTATGGTTATTTATTTATAACTGAATCCCGATAGCGATAAGAAATTT  
CTGTTTGTAAATATGTGTCTTAGTCGTGGGCTTGTGGGTTTAAACCGGTGTCCTTCTTTGTTCTAGAAGGAT  
CTTCTAATCGCGAAAAGAAGCATTGATTCAAATATTGTGTTAAATCATTATCGGAAAATGTATTTAAGATTA  
TTAATTCAACAATGATGGAACCACGTGGCTTACGTAAGTTAAACCAGGCGAGCAAGCAGACGCTGTTCTTCG  
TTTTTCCAGTCCGCCAGAGCTAGTCTTGCCGTTTGAAGAAGCACGCAGTTTTTCTAACTCAGTAGTTAA  
CAAACCAAATGGCGAACGCACTCAAACGATTTATCCCATGTTTGATCGTGTTTGATCGAAAGGGCTGAG  
GCCATGACTAAAACCTCGAGGTGGAATTGTTATCTGAGAAAAGCCCAACAAAAAGTGTGAAAGGCATGGT  
TGTTGCAGTTGGACGGGATCCAGAACAGAGAAAGGTGATCTAGTTCCATTGGCAGTGAAGGTTGGTGAC  
CATGTTTTACTTCCCGAGTATGGTGGCACTAAAGTTGAGATTGAAGAAAAAGAATACCACTTATTCCGTGAA  
AGTGACTTGTGGCCAAGATTGAACAGTAATTCATATAAAGCATTTCCTTAAAAAAGAAAACAACTGA  
GTGAATGGGAAGATTTGAATGTCAGCTTGTATGGTAGTCATTTATATCATGTGCAGTTTAGGAGATGAAATAA  
ATCCACTTTTTGTTACATTTT

>19 c31673\_g1

AGTCTGTCATGGAAAAAGAATTGCATGATTCAATGACAGATGGTGTGTAACCTTTATAGTTTCCATGGTTT  
CCATGATGTCTTTCTTCTGAAGATACCTTTCTAGAAACATTGCATCTAATTTCAATGATTGATGCTCATTAG  
TGAAAAAATTACGATGAGTGTGTTGAGAAGCTTTGGTTGCTTTGATGAACCGGTATTTATTCTCTATGCCTGC  
CATATTGTTGAGAATTTTTGCCTGTTTTAAAGGCCACAAGCCCCACAGGATACCAAAAAATTCTCAGTTGTCT  
TTATTGATTTCTCCCCACCAAAGTAGTAAAAACAAAGATCCGGCACGTATGGAATAACGTAACCATGATTT

CAGGATTGCAATGGCGCTCCATCCGATTAATCTAAAGATTTCACTCGTATCAAGCATTTCCTTATATTTT  
TATCAAAATGTTTTACCCTCTACAACCGTCTTCTTCCCACAAAGCTTCTCAAACCTTCTGCGTCAAACCTGGGT  
GCCTTTATCTATTTGCAATCCTCAGCCAAAGATGGCGTAGACTGGTGACATAACGTGTTTCATCTACAGTTTCG  
CAAACGTCAATGGCCGACTGTTTAAAGTCACAAATTAAGATTTTCTGATCGAAGAAAATCCAAGAACTT  
ACGAACGAAAAGTTAATATAAATCCTGAATTGTTTCATTCTGTAAGAAAATCACTTATTCTATTAGAAAGACGC  
CGTTTTTTTTTGTGTTTCTAACGAATAGCATTCCCATATACATAGTGATAATGGCTAGTTGGTTAGGGTAGG  
TAGGTTCCCTTCGCAGTGCATATAGATTTCCCATCTATTTCTGTGTTAACGTTTCGTGTGTGTAGATGTG  
TGTGTGTGTGTACGGTGGGGCTATATAAAATCTTGCCTCAAGGTTTCCCAAAGTTCGTAGGCCAATAGG  
GGCTCAGTTAGTGTGCCACGCAAGAGCCCTTCTGTAAGAAGAAAGAGGATTAGCCGCCCTTAGGCCGCA  
GAATTGAAAATCAAAAAGCAAATCTCATTGGCTGCCCGTCCCTAGTCCATTGCCATATCCCACTCTTT  
GGAGGTTCTTATACGCTGGCACACAGACTGTTCTGTGGACTTTTGTATGCTTCGAGATAGCCCTCGTTGTAC  
TGAACCTCACGGCTTAAAGGTTTTTACGAATTTACGAATTTGCTGCTTTTGAATTATCGACGTTTCAGAAAA  
TGCCACGCGCAAGGCTGATGCTAACAAACCCCGTGGCTCGTATGACGGCTTATGCTTTTTTGTCCAGACTT  
GCCGCGAGGAGCACAGAAGAAGCATCCCGATGAGAATGTTGTGTTTTCCGAGTTCTTAAGAAATGTGCT  
GAACGATGGAAGACTATGAGTGACAAGGAAAAGAAGAGATTCCAAGAAATGGCTGAGCGTGACAAAGTTC  
GCTTTGATGATGAAATGAGGCATTATGAGCCTGCTGAAAAGGTGCAGGAAGGGGACGTAAACGCAAGCA  
AGCCAAGGATCCCAATGCTCCCAAGCGTCTCTATCAGCATTCTTCTGGTTTTGCAATGATGAACGTGGAAAT  
GTGAAAGCTGCTACCCAGAGTACACTGTTGGAGATATTGCCAAAGATCTTGGCAGGCAGTGGGGTGGAGG  
TAGATGAAGCTACCAAATCCAAATATGAAGCCATGGCTGAGAAGGATAAGGCTCGCTATGAAAGAGAAAATA  
ATGCCTACAAGAAAAGCTTAAGGGTGAGGCTGACGAAGAAGATGAAGATGATGATGACGATGATGATGA  
GTAACATCTTCGTTAGACTTACCTCTGCTCCTTCCCTCTCAAACCCCGGCTTTTTTTCATCCCGTGCATTT  
TTTTTCTTTTTTACTCCAGTTAGACATGTGTTGCCAGAGTATCTCATGTTGTTTTATTTGCATCTTCATCG  
TATCATCTTCATTTCTTCTCCCAAACTGCTGACTGGTGTACATATCGAGGAAGACAGACACAACAGATAA  
TCGCTCGCAGCTCCATAACCCCTTGCCATCCACATATTTGAAAAGTTCTTGAATAGCAGCCATTTTCATT  
CCGACAGATCGAAGTGAACATCACCCATTTTCGTTAAGGGGTTTTCTTCCCTGCTCACCTGTTTGTGTTTGGT  
CATTATCGATTGGGTTGGAAGGGCTGAGACAAGATAATCTCTTAAATGAGATCTTTTACATCGGAATCCCC  
ATCTCTCTCTCGCATATGTTACCAAGGAAGCCGTTATAATATCTAACAATTCTCCAAGATTTCTTGTGGCG  
TTCTGTTTCTACTTCCACGTCCCAACATCATTTGAAAAGAAAAAAACGATAAAAAACAAGCAATGAATACA  
CATCCCATCTTCCATGTTTCAAAAAAAACGATAAAAAACAAGCAATGAATACACATCCCATCTTCCATGTT  
TCAAAAAAAACGATAAAAAACAAGCAATGAATACACATCCCATCTTCCATGTTTCA

>20 c22501\_g1

TTCTTTTTTTTTCCATTTATCAAATAGCAATACAAAACGCGTATCGGTTCTAGATGTTCACTAAACCTTTGTTT  
AAAATATATAAATATGCAAATAGAAAAAAGCTAATAAAAAGCATTGAGAGGAGATTAGGAGGACATCATAA  
TTTCATGTACAATTCGTAAAACAAACAGAACATTTTTTAGTAAAAATTAATTTGGTTTTTGTGTTTATTTTTT  
GAAGACAGGGTATATTTTTCAGAGCGCCGCAACGGCACACGTGAGCGAATTCATCGATTAGAAAGATTTTCG  
TCCCGCTGTTTATTCGTTTCAGCCACATCGACGCCGCCCAATGGGATGGCCTTCGCTACTCTCCTCGCCGCT  
GTCCGAAAGGAAGCCGAAGAGGGTGGAGGATCCAGTGCCGAATGGAGCGTGACTTGAACGTTGCGGTT  
GAGCGAAACGGCCGATAGAAAACGCCGCATAGGTCGACGAATGCCACCGTTCCCTGAGGCTCTTCTGTTGA  
CGAAGAACTCAATTGACGCCGATCGAGGTCGAGTAGGACGCCAACTGTAGAACCGACGTGATTCCGCCA  
TCGTTTCGATGACTGTGCACGTTATTGTGGAGGAACCAAGACCGTTGATGATCAATATACATGGACCATCCTA  
ATTCATCTTACCAGCATGGAGTCTTTCGACGCTCTGCCTTGCCACGCCAAATGCTGGATCGGCTGCTCC  
ATCGTAACGGTCGACGGTGTATTCCAGTAGTGGACGCCACGTGAGAAACCGACTGAACTGAGCAGAACAC  
GCGGTTCTGTAACGTTGCGGTCGTGGCAGTTAGTCCGCTGCTGATAAACGAGTTTCTGCTGGATAGGCTGTCA

TGTCAAATGTGAACCAAGCCACTTCGGCGGTGTGTAGACCCAGCGAATCGCTGTAGGGCCCTTCACCGCTG  
CTGTTGAAGGCTTTAACACGGGCATTGTAAAGCGAATTGAAATGCAGGCCGTCCACCGTGCAGATGGTTTC  
TTTGCCACAGTAAACCTCGCGGAAACGGCCGGCGGCGACGCCTCCTCCATCGTCCAGCTCGAGGACGTAAC  
CTTCGACAAAGGAGGCCGATGCGGTTGCCAAGCTACGGTGATTGAATTGTTTTCTGCGCTGCAATCCTCG  
GCCAAGATTCTTGGTGGCCCGGAGTTTCATTTCCAGGAAAGTCAGTTGATCAATGTTACGCCGCAGACC  
TAAATCGTCTAACGTGAGCTCAAGTGTGGACTAGCCGATTGGTCAATTCGTCCATTTCTGCCGCAAGTC  
AGATCTAAATTGGAGACGCGATTGACTAGCATCGACCAATCTGAAGAAAAGCCGATGAATCGGATTCTTTC  
AAAGCTTCGATGCAGAATTGAACGAGCGCCGTCGTGTGCTGCAGGTGAGCCGTGCAAGTGCCACCTCTTC  
CCGCAATCGTCGAATTGCAAGTCACGTTACGCCGGGCAAAGTCCACCAGGGCCTCTCCCTGCGTCGCA  
GTGCTTCCATCAGTTCCAGACATTGAGCATGGATGGCCGATTTCGACGTTGGCACAACCTCTCCTGGACCGTT  
CCGACGAGCTCTCAAGCGCTGGATCACCTCCGTCGCACTTTTGGCTTTCTCCGACAGCTGTTGCAACGATT  
GCGTCAACTCGGCCTTTTGTGTTTGCAGATAAGGGCCAATAGATGGACGTCGTGATTTTGTGTCGGCCAG  
CATCCGATAAGACGCACAAGTGGCAAGTCCCAATCGACAAGTGTGCAATAATATGATTGCACCTGATCACC  
GTGTTGCTGCAGTGTGGAACGGCGTCTGCAGACGACTGCTGCTGTGTTGGAAAGCCAAAAACAAA  
AGAAGGTGGGGTGACGATGATGTGGCACGCTATTTTGTTCATTGGATGACGGCTGTGAGTGGAGATAAGA  
GCGTGTGCTGCCGCTGCAAGTTGGAAACCAATTATAAAGAAAAAGTTTAAGACGACGAAAGAAGGTGTATA  
CACCAGGTTTCCAGACAACGACGATCCCATATCGTCACGACCATTATAACCATAGCGTAACCATAAAAGGAT  
AACGTGCCAACTGTAATAGATCTATAACAAGAAGCGACTATTCAAACGCGGAATGGGTACAATTTTCTGG  
AAGATCTATCGTTAAAGGAGAAAAGTCTTGATCAGCTTTATCGGCGATCATTTTAGCGATCGCGAGAGAACTA  
GTGGCTCCAGGTGAAGGGGTGTTGCGGCAGTGAATAATGTTACGACCGATTTACCCATTCCGTAGTCGAA  
AACAAAGTCTCTATTAGACTGCCGTCAGCACCGAGAGCTTGAGCACGGACCCAGCTGGTCTCTGCAAA  
ATGGAAATAAAAGTGATCAACAGTGATGCTGGAAATGGACGTACATTAAGAGCTCTTCACTGCTAACTG  
ACGAAGGCGGACCGAACGATTTCTTGAACCTCCGAACGAAGCATATTTCAATGCTAATTTCTGGAACCCACGA  
TAACTCAACGAATCGGCAAGGTCACGTAAGTTAATGTCTCCCAGCTGTATCCTTACGCTTCAAAGCTAACA  
CAGCATTAGGCCCCAGCCAAACAGATCCATCTATTCTTGGGGTAAAGTGGACACCGAGGAATGGGAAACGA  
GGATCAGGTACCGGTAGATATTTCTTTCACTAAGTGTGTTTTCGCAGGATTGAGCAAAGATATTGCCAC  
GGAAAGGCACAATACGTGGCTCCCTCGAGCAGCCTGAAAGTTCTGCCAAACGATCCGATTGCAGGCCACCA  
CACGTCAGGACGTACCGGCAGCGTACAGATTGCCATTGCTTGCTGTGACTTGATGCCTTTTTTATTGTGCTG  
CGACCGCCTTGACTTTACTTTCTTCGGCAACTTTGAAATCCTTAACTTCAAAGTTGAGATGAATTTGACCTCC  
AAGTGATTTGAAATCCTCGCCGTAATACTGAGTAACTAAACCCAGTCCACGATTCCGGTATGTGGCGACCAC  
ACTGCTTTCAGACCCTGACAGTAGGGCTCTATTTCTTTGATTTTTGCTCCATCAACCATTTGAATATCTGGGAC  
ACCGTTCTAATTCGCGATTGTAGAGATCCTCCAGCCTTGCCAACCTCCTTTAGAAACAGCTACAATAAGC  
TTGCCACATTTTTGTAGAGAATCCCTTTCTCATCAAATACTTGTAGGACAGGTGGAGGCCCTTCAACACACA  
GTTTTGCTTTCAGCGAGCCAGGTTTATAGTAAATCCCACCATGTATCACTCCGCTATTGTGCCACTTTGATGT  
GCAGCTAAACGGTTTTCTTTTTCAAGAACTGCAAATTTAAATTTGGATGTCTCATTAACTCTCCCTGGCAG  
CTGCCATCCCAACAATTCCGCCTCCAACAATAACAACATCATATTCTGGCTCCGTTGAGATGAAAATTTT  
CTATTATAGCCGATGACGAAGCTGGAACACAACTGCTCGTTGTACATTTTGCCTGTGTCTCGAAAACGAA  
GAACACTGGCGTGATTTGAAAAACGTTGTGCATTGTGCTAATCTTCGACAACCTGTTGCTTCTGCGT  
GTTACGTGAGATGTTGGTTTATGTAAGTTTATGTAATGTTTGTGTCGTGCCGAGGGTCAGGTGACGAGTAC  
GAGAGCCGGCAAGGGCAACAACAAGGTTGAACGTTACGCTTAAACAGTTCTTTCACACTCCAAAAGGTGG  
CCTCAATTTATCCAAAAAGAAATCACACTGCCATCACGTGCTGAGCAGTTCTTTGAATCTGTAATCTCGTCC  
TTGAGTTGATTTCTGATTGTTTTCCAGCTAGTAATCAAATACGACTAGTTCGTACAATCTTCGCGATAACGTGG  
CTTAATAAGCATTATACAGCATTTTACAGCTGTTAAGGAAAACCTTGATTTTTCGATTGGCTCCAAACTCCGG  
TAAGACACTCTTCATCTGTTTCAGTTTGTGAATTTCTGATGCACATGGGCATGCACATGGGTAAGCAACGAT

AAACGAACGGAATAGTTTAAACAAAAACGTCTTGGCTAGCTTGTAGGAAAATTCTAATGTTATTGGATTAGT  
GGCCTTGATGTTGAAATTTTACAGACAAAACCTTCGCTATTTACGAAATTCTGTGTGGGAGCATCTGTTCGATGGG  
TGTTCTGTTGAAGGCTGTTTCTGATCAGCGGTGGACTCGAGCAGCAGCTTGACAAGCACCTTGGCGTCTTC  
GTTGGTAAAATCAATTTTTTGTGTCTGTTTTACCAATGTAGAGATGCTTAAATCGGCCTTTGAGACGGCGA  
AGAAGGTATCCGGTGTCCAAGCATTGTAGTTTCTTGACTGAGGTAACCTACAAGGCGGGCAATTACTTGT  
TCAGAGACGACTAATTCATCATCTTTCCAGTTGGAGGCTGACAACCTGCTTCACTTGGTTGAATTTCTTGG  
GCTTGAACCTTGTGACATCAACTGTCCATCCAAAACCTTTAGGCGGAGTCGAGCCATCAATGCAGGAAATG  
CAACTCGTGATTCTTAAACGGAAAGGCAGCTTTTTTCTCCATGACGAATGTCAATGGGCCAATTTGCAGCT  
GAACATCGACGACGTGAACAGATGAATTCTCTCGTGAACCGATCATGACATCGTCACTTCTTTCAATCAATTC  
TACACCTTCCACTCGAGTAAATGTTTTCTGTGAGTAACGCCGGGCGTGAGCTCGGCGTTGCTTCTGCTCATC  
TTCAGGTCTTACCCTCAACTTTCAATCCTGTAGATGGCTCTACTGACGATCCATTTGTACAGTGGATTTCTG  
TTGGCTTAGCAACTTACATAATATTCGGTGGCACCGTCGGATAGCACAACAGGTGATGGCTTTGAAATTAG  
ATGAAAGCGTTTGAATTGTTGTTCTCTACGCAACTAATATTGGCAGGGGTTTCGTAACCTGCATCTTCTCG  
TCGTCATCGTCATCATCATCTTCTGAGCTTTATTGGCTCCTTCTTTCCACTGCTGACCTCAGCTGATGTT  
TGATGTTATCCTCCGTATCGGCAGATAGTTAGACTCGCCTTCGGCGTTTTCGTCATCTTCGTTATCGTCGAC  
ATCACTATCGGTTTCCACTTCGGATGTTTCCAGTTTATTGGCGTTATCCGATTACCAGTGATACTTTTTTCGCC  
CGAACCAGCGCTACCGGCGAGTTGAACGAACATCCATGGAACAATTTTCATATCTTCTGAGGTTTATTTAAT  
CTTAAATGAAATGTGGAGTTTCCATTGTTCAATGTTAGCGAAAAAAGTGCAGCATCTTATCCATGGCATCGT  
TCAACTGGTCAGTATGGGACGATCGTTCCTGTACTGGATTTTCGAGTAGAATTTCTTGTGGCCGTTCCGCCAG  
ACGATTTTTCGTTCTCAATTCGCTTTGCTTTTTACTCCAACGATGGTGGTGGTGGTGGTGGTGGTGGTGG  
TGATCGATAAAAACGATTCTTTTCTGCTGTGTAAACATTTTTTCTTCCATTTTGCCTTCTTTCCAAATTCGAT  
GTTGCCGCGTCCGGGTTGATGCCACTAATTTAGAGGGGTCGGTTTCTTCTCTTCTTCGCTTTCATCGGTGCG  
TTACGCATATGATGCATACCTTTGCTCCCTGACCGAGACATCCGTCGAACTGTCTTCGGCTCCAGTACCTTCA  
ATTGAATTGGATAAAAACAGGCGAAACACATAAAATAACAAGGCCAAAAAGAGTAGCCTCATGTTGGAATCT  
TACAACAAGCGAGGTTTGTGACTGTAATTCTAGCTTAACGTGTACGTCTTCACCAACGATTGACGATAAAT  
TTCTGTGCAGAAATTGTAGCCGGCTTCCATATATATACCACTAGGAATCTAGTAGGACAAATCGTTAGTTACGAA  
TCGCTGATACCATGAACTGCGTAGTACACCAGCAGACATGTCAAAGAAGCCGACTGGGTTTTTCCATCATGT  
TAACGCCGTGGCTGCAGTTCTGTTAAATTCGGTCTAAATTACAGATGTCAACCACACATGCATCTAATGCCT  
CAGGCCATTCAAAGATGTTACTCTTCTACATTGGTGGCTTTTTGTATCCTGATATTTTCATGGTGGCCTCAG  
CCATTAATGCAAACCTCAGTAGATCACTGCTGCAACTTGATGATCTACCCAGCAGTGACCTGAACCTGATGG  
AGTTGCTTTGCTTGAAAATCTAGCAGAACAGGAGAACGTTTTTCTTCCCTACCGCAAAGAAGTAAAGAAA  
AACAACTTTGGCACGCCAATTAATTTTTCTGTCATCGTCAAGGGTTTTTACTCGCTTCGTTTGACAAACG  
ACGAAACGAATCAACACAGATTTACTGTCGGCGTGAAAACAATGCAGTTTGAAAATCCCGCTATTTGTGTGCG  
TCAAGGTACCTAGCCACCTAGCGGTGCTTATAAACATTACGAAAAGGGGATTAGAAGATGATAACAAACATT  
CCCAATGGAGAAAACACAGTCCTCTTTGGCTTTGGTTTCAGTTGAATTTGAAATATTTGGAAGGGTCCAAGG  
TGTTTTCTTCCGAAATATACTCGTGATCAAGGTAACAAATTGGGACTGAAAGGATGGTGTGCGAAACACCGA  
AGCCGGTACGGTTGAAGGAGTCATGGAGGGAACCAAGAGCACGTGAACATGATGAAGGAATGGTTAAG  
ATACAAAGGGAGTCCACAGTCACGCATCGATAAAGCGGAATTCTGCAACGAAAAATTCATTGAAAGTCCAA  
CATTTACCACATTTGGTGAAAAAATAATGCTATTGAACAACAAAAAATCATGAAAATACAGATTTAAAATA  
AAAAACATGTCAAGAGTGAAAGTGA

>21 c23556\_g2

CTGCGAGATAAAAAAAGAAAATCAGTACAAGCAGACGACGGTGAGAAATATTCTTGGACAGAACAACAATA  
AAATGAATTATTCTTAAAAACAAAGAAACGAACAAAAAGGGCAAATAAATCTTCTCAGCTAGATGACTTCA

CATGATTGAAAAACCGGAATACCAGTATTTTTTTTTTGCCAACCAGTCTGGTTTACACTCGCAAAATGTATGC  
ACGCAGGGTGGCTCATCCCCTCGCCATATGCAAAACACGGTCGTGCTGGCATATAAAAGAGCAGGAAGAAC  
TGCAGAAAAACATCGCCTCCTCAGTCAGTTCAGACTACTGTTTCGATTCAACTTCTTTCAGTTGCTTCTCCTC  
AAGTATACTCTTTTATTACTCACCATGTCTAATTTGTTCTTGGTATCTTTCTTGATTGGCTGCTGTATCGTCTG  
CTTGGGCCAGTCTCAATCTTCATGACGGACCTCTCCTTTCGGGAGTGACCTCTTACCCATCACGGTAGAGA  
CAAAGACAGTGGACAAAAGACATACTTGTTACGTAACAGAAGGCGTAGTCAACCAATGTCGGCGAAAACGT  
GGCATGGAAGAGCAACCCGTCTACGAAGGTTTGGAGATTCAACCATCGGAAGTAATTGGAATTGAAGCTAC  
TCCCGTTCCTCGTGCATTGAAACCGATGAATTTCCACGATTCCGAAAAGGTTATCGGCTCATTGACGATGCC  
TATGTCAACTCTCAGAATATTTCCGACAAATTGCTGTTAAGGGCCGTAGCAATAAAATCACGGTCGGTGATT  
GCGGCAAATCCACCGTCAATCTCAGCGAGTTCTTAAGTGTCTGGGCATGACTGTTCAAGAACTACAACGT  
TGACGGCCACTTTTACAGAGCTCAACAACACTACGTTGGTTACGCCACAATGACCGTCAAGCATTGTACCC  
CAGCAGGTTTCCCTTACACTTATTGCCCTGTGTGAATTCAGCATCCTGCATATTGAATTTGTTAATGGTAAAA  
GACTTGTGCAATCCTGCCCGATCCCTGGAAATGGAAGAGATTCTTCAAGCCCTGGAAGATCACTTATGAA  
AGAGTAATCTTTCAGGTGGATCATCTGTTGAGGTGGTCTTGATGTTGACTTTTCCATTGTTTTCGTTATTTGTT  
TTCTAAATTATTTGATACTTTCTTTCCACGGCTTTTAAACAACCAACTTCAATTTTCGGCTATCTAAAATCGTTT  
TCTTCTTCTTCTTAAATTATACCGACTTTTGCCACATAAT

>22 c16151\_g1

AGGACGCGCCTGGCTGCCAAGGTAAGTCGAATTATTTGTCACTTCTCTGTAATTCAAGTAAAATTAGTTG  
GGATTTTTTGCAAAACCACCACAATTAATACTAAGTAGAGTGACGTTATGAGGATTTTGCACAATTTTCTTG  
TGGTTTAGAACGTAGGCAAAACGAGTTAACGAATTTTTCTCCAAAGTCTCATCTCCAAACCCTTGGGTTGGC  
TTTGCTTTCCCTTTTGGTCGGGCACGCGGGGGCCCGCCATAGAACAAGTCTACCCGTTTTCTCCGTTTGA  
CGCAGTGTATCTGTGTGTGTGCGCCAGTGTGTGTTAGTGTCCCTGTGTGTGTGTACCCCAATAACGGCGTG  
TAGATATCCCGGCCCTACGCGTTCTGAGAAAAAAAATATCCATTTTGGTATTTACGCCATTTAGGTTTTT  
AGTCTTAAAGAGTAAAGGGATCCAAGTGTGTTGATTAAGATGGCTGATGCTGCATCACCTAAGAAACGCGGA  
CGTCTGCAAAGAAAGCTGCTGATGGCGAACACAAAGAGAAAGATGAGCCCAAGAAGGCCGAAAAGAGG  
GTGGCTGCTCCAGCACCAGCAGCATCATCAGGAGGCGAAAGCGGCGAATCTCAGGTGAAGCGAGGCCGA  
GGCCGTCCTAAAGGATCTGGCAAGAAAGCCAGTGGAGCCGAGGAGCGTCTGCTGCCAAGTCCAAGCCCC  
CTGCCGGCGTCTGTTGGCCGTGCCGTCCCAAGAAGAGCGAAGCCAGCAAAAAGGATGAATCAGCCGAAG  
ATGAGTCCGCCGGAGATGAAGGAGAGTCGTCATAAAACGTGTTCAAAAACCTACCACAATAAATTGGGAG  
TTTTTTTTAATTTTCATCGTTTTTTGAGTTCGACATAGAACACGATTCGACGAGATTATTAGAACACGCCTCTT  
AAAAAACAAAATGCAGAAAACCATGTCGCGTCATCCATTATTTAGTTTTTTTTTCTTTTAACACAACCTATC  
CACATCTCATTACACCCACCATCTTTTAAATAGTGTCCACCCCTCTTGAAACCCCTAACAGTAAATCGCCAA  
CATCTGCTCCTGTTTTTTTTGTTTTAAGTCTCCATCCTTTCTCACCGTCGTCTCGTGTGCGTACGTCTCCCT  
TTTTACTCTTATTATACCGTTTTTCATCCCGACCTGATGGTGTGTAAGTGCAGTTCTTAGTCTCTCTATTTTACT  
TGGATGAATTCTGGATGGATGATACCCTCCTCCGTTTCTCGCACCTGTAATCCCATCTCGGCAAAGAAA  
CACAACCTGCCATCCCATCCGATTCTGCACATCATACATTGAATCAACAACCTGAGCCACAAACATATTATTA  
AACACGTTTCACTCGTGACGCTATCCTCATTTTCTGGCCATCCAATACAAGATTTGCGTTGATAAGAAAAC  
CATTTCAACTTGACTTGTTTAGTAATCTCGTATTATTGATCGCACACAGAACGAGAGGAAAACCCAACCGTCA  
TAACAAACTTCAATCTCAATCTTCAAGGCGTTGACTAGAAGGCGTGGCAGGAATCAGGATGAAAGATGA  
TTAGGATAAACACACAGGAGAACAAAAACAGGGAAATGGGATCACACAAGGATAAATGTTATTCTTCATTC  
AACGTCCACCTTACGCCGAGAACTGCAATCGCGTACAGCTCGTCAAACGGCGAATCCATAAATAACTCGTG  
AAGAAAACGGCGCGCGCAATCGGTAGCCGTGAGATGCCATGACGTGACAGACATCTGAGAAGAGACAG  
ACATCGTGAACGCCCATGGGAATCGCTGTTAACCTGAGAAGACCTTGCTCATTGTCATTCAACCCAACG



GAGCTTCCCATATTTGTTACAAGCCGTAATAATTCTTTGCGAACTAGCCATTTTTCTCCTCGGTTTGTGTTTGT  
GTCTTGTCCACGATCGCGGATGGATCTTTGGAGCAAACGATGCAGTCCTGCCATTGGTGAACAAAATGGG  
GCTCTTCATTGAGTGCATGTTGAAAACTGGTGAAGGCATCGGAGGAACTGGTTGCTCAAACCAATCC  
GCTGGTGGATGGAGGTATGATAGCTGAATCGGCAAACAGAGTCCAATGTAACAACCAGACCTATTGTTCAAC  
GAGCTCAAAGACGCGGCCCTTCTTTATACGACAATGATCTTAAACGACTCAGAATGGAGCCGATGCGATTG  
AGTTGATACTCAAATGTAATGGTGTGTATCCCTTCTTCTCTATCGTCTCTTCGCTGGACGCTTCTTCGGC  
AGCAGAAGAGGAGAAGGTTTCTTCTGTAGAACACATCGCTCCATCCGTCGGTTCAGAGCGGAGCAACTGG  
ATAGGTTCAAGTTTCTGGTGGTATAAAGGAACTTTGTTTCGACGACGATCGCACAGGCAAAGAAAAGCGTTT  
AGATCTACGTAAACGTAACTGGTACGTAATTTACTCCAAATGCGGGACTCTCTTTTCGGTCTCGTTGTTGGA  
GAAGTAGGAACCGCACACGACACGCCATCTGCCATTGTGTAATGCGAATCGCTGAAGCTGCGGAAGTGAGG  
CACGTATTCTGTCCAGGGGTTGAACCGAAAGAGGCAACGTGTACGCTCTTCGGCAACTCCGATGGCATT  
TTCCGGCGTGGGCACATCTGACGAATGGTCAGAATCCGAATCAAATGATGGACGAGCCTTCAAGTGAGT  
ATGGCTGTGAATCCGTTTCCAGCAACCATTGCTTGTCAACTGAGCCACTTCTTTGTCTAGGAGTTGAGG  
TTAATATCGATGCTGCTCTTGTATCATCTTTTCGTCAGCTGCAAAGGTAACACTGTGACAGGAACTCTGGCTC  
ACGGTGCAGAGGACGGTCCGGAACGACACCGAGATGAGAATTGTCTTTCAGTATCAGTGGGTCAGTACATG  
TTGGAAATATAAGGAATCCACTCGGAGTGTCCAAGACATGCCATAGTTCACCATGATGTGCTTTTATGGAA  
GCCCAACCAAATGGGCAAGAATGTCGACTCCAGCGCTTGTATGGCGATTAGATTTAGGGCGAAAAAGC  
TGTGCCTCTTAGAGTTAATACAGATGAGAATGACGCAATACGAACCAAGGCTTCCACCACTTGAGCTGATTC  
CAATAATGCAACACCGGGTCCGAAGTTCCAGATGAGCACATGCCATACAGCAGCTTTGAGTTCTAATATC  
TCTTCATCAGTTTCAATGGAGGCGTTTGTAAACACTGAAAAAGCTTGGATAGCTGTCCTGAGGTACGCAAA  
AAATCTAGCCCTTCTATGCTGATTTAACTGGGAGAAAAGATGTGGCGGCATAGGCAAGTCTCGAATTGCA  
TGGCGTACGTTGCTCAGACGGCCATATCGACCATCTTCCGCTCGCTGATGCTGAGTCAGACCATCGGCTAAG  
TCACTTCAACTAAGTGGACATATCGAATATTTAAATGCTAATCCACTGATCCAACCTTTTCTGAACAAGGGA  
CACTTTTCCATTCTCGGAATCGGTGACGGTTTCAAGCCAATGTTTGAATCCAGCTGGGATCGACAGAGTTTT  
GATAAGTAATAGTCGAGCACGAGAATCTAAATGCTGCTTTTCTGCTCCTGAATTAGCTGAACGAACTGCGTC  
TGCAGCGGGATCAATACCTCAATGCATGCCGGATCGTCTGTTGCTTCACTAAAATATCTGCAGCAGTTATGAC  
AACAGCCCGCTTTTATCATTCAATTGACCAAGTAGCAACGGAACAGCCCACTTTGCAAGAACGCTGGTCTG  
TCCATATTCTTCTGCCGCTCGCAGTAGAACGGAATATGATTTGTCGCATAAATTCGACCAGAATCGACAGGT  
CCAAGTAAGATCTTTTCAAGATAGCTCTGGCATATCCGTCGGTGTGAAAATCAAGTGTGGAAACGATGACT  
TTCAGATAACAATCGTGGTTCGTGCTCGCCACCAATTCTAAAAGATCTTGAAAATGCCGGCCTTTTCCAAGG  
CATAATTCCATTGGTGGTACTGCTCAGCCGGCCAATAAATAAGAAGTAATCCTGGCAAGCTGTTGTGGAAA  
GTCGACCAGGGCTAAGCAAGCAATCGTGGGCTGAAGAAGCTTGTGATATATCTCGGATTGCGCTACTGACAT  
CGTCAAGGAAATCGGACAAGATTTGTCGCACTCAAACCTTTCGACAACCTGTAAGGGCGTCCATCAAGTGA  
CAACCAACAGAAGAATAGAGACGGGTCCGGGTGTTACTGAACTCGCACTGGCAAACTGGTTGCTGCTGG  
GCTTGTAAAACCTGCATCATTGCGCGAATAATCGAGCGCAAGATGGAATCTTCCAACGCACAAGAATTCATCTT  
GCTCCACTGGAGAAGATTGGACAAGACAGGCCAGTTCCAGATCAATGGATCTTTCTGTGCTAAAACACCAC  
AGTCTCGTGAAGCGCAGAAAGAATGCCATCGGGATCTCTACTGGAACGCATTTCCGACTCAACTTCTCCAT  
TATTCTGGAACCTCTGGTCTGCTCGTATGACGGTAGCTGCGTTCTCCTCAGTTTTCTATTTTTGGCTGAAAA  
CCTTTTGCATTGTTGGAAGCTTTCGTTCAAGTTCAACGATCTGCTTGAGAGCCAACTATACGGAACGATTC  
CTTTTTCTTTAGTTGATGGATTTTTGAAAGGGCCGCTGCTGCTTGAGCGGCTCGATGCCGTTTTACAGGATC  
GTTTTTGGAGGAGTAATGCTGTGACTAATTGAGGAAGGCACATCTTTGTACCGTGGCACGATGGTGGTA  
ATAGCGTACTACCAAGATGCAACAGTTCCCAAGTAAGATCGTAGCACGAACTGAGATGAACGTGTCACTAG  
TTACAATGACTTCCACCAGTGTCTGGACAAGTCGCGCTTCAACCAAGCAATACACTAAGAGGGCCGTATGAT  
TCAATACTAAGTTTGGTCTGAACTTTGAAATACGTGGTAGCAAGCATTGCCCCTCTGCGGCTACATAACCCCTC

TTGAAGTTTCCAAGCATCTCGTACGCGGGAGGGGTCAGTGGCTAGAAGCGCCACAGAAAATTCGTCTGTCC  
ATTCCGGAAGTGGTAATCGCAGCAACGTATAGAAGAATTCTAACATTGATTCCTGGTTTCTAAATGACAGGG  
TAGTAAGACCCGGACCAAGTCTTCTAGGATTTTACAGCTCATGACATGTAATACTCCATTCCAAGATCTGAGC  
ACCGTGAGAAGAGCTTGCTTGGCACAAGCAGGCGGAGCTCACGGTCATCTGTCGTGTCGGCGGAAGTAT  
TGTTCCCTTCCCCTGACTCTGCATGGTGCTTGTAGTGAAAATCACTGTAGGGAGCAATCAGAAATCGCAGGT  
TCAATTTTGAAAAGCTCTCGCCGCTGCGCCGTGTCAAACAAGTATAGCAGAGAAGCAACCATAGCTTCCTGCA  
TACGAGCAGAAGAGCAGTCCAAGACCGCAGAAGAGAAAACATCGAACACCTCCGCTGGCAACAAACACAG  
ACGGGTAAACGATACAAAGTTCTGCAAGAATAGCAAGTGATGCTCTAACCAAGCGGTCTTTTTCTTTGGTGC  
CATCAAAAGCCAAGGCCACAATTGAACGGGCCAGAGCAATAGGAAATAAAGATGGGTCTACCAGTAACAAT  
CTTCTGCATAATCTCAAGGCCTGGGCACGTTCTGCCAAGTTATCCACAAGCACATCCAAGCACTTTGCAATGA  
AAAAGTGCAGATCTGCTTCAACCAATTTTTTGCATACTTTCATTTTTTAGGCATAATCTGATCACTCTTAAGC  
CAGCAGCTCTTACTGCTTTGCTGTCGTTAATCAATGGAATCCGCAAACATATGAAGAAATCCAAGCAGTCAA  
GTTCAACTGTGCACAGCCTTTTTCTCAATATGCTTTGATATCACATTTAACACCGATCCTACATGAGGTTTGC  
CAAGATTGAAGGAATCTTACAACACATCTGAAGCAAAGCATCTAATGTTGGGAGTTGCATCTGTTGAG  
CACCATTGCACATGTCGAAGAAACTAGCACGTCTGATGTAGCATTGATTTTGACAGTTCGCCCCATTCTCG  
AGGCGCTCCATTTTGAAGTTGACAAAACAAGTGAACGAATACGCGCGGATTTTAGTTTTTGAACAAG  
AAACGTGTTTCTCAATAGCAAATGAGTGGGACTCGAGCTGTCACTGCCATTTAATATTTGCGTTCAGAGCTG  
GGTTGTAATCATAGTTGCAATTC

>23 c16413\_g2

CGGGGACACTTGAACATCAAGTCAAACCTCAGCAGCTCTCCTCTTCAACATGTACAAGTCAATGAGCCT  
TTTGGTTTTGGTGGCTTTGGCTGCTTGCCTTGTCTCCATGGAGACCCAGGACCAGGAAGCTGCTGAGCAAT  
ACTACCGCTGCACGGCTTTTACCCACCTGGTACACCCAGTCGCCACAGCCGTCACTGGAGTCCGCACTT  
ACCCCTACCTACCTATGGCAGCTTCCATTCACTTATGCCGTTATAATACCTACCCCGCCGCTTTCCTGCT  
GTCAAGAATGTTGCCACACCTTACACCGCCGCTGCCTACCCCTACCCCTACGGATATGCATACAACACCTACC  
CGTACGCTGCTTACGGCGCTGTTTCTTATGTTGCTGCCGCCCTGCTGCCAACCCCGTCAAGGCCTAGATTAT  
TTGTTACGTAACACCGACACGATCTTCAACGACCAGAGCTGGACTCGAATTAATTTGCCGCACTTTACATCA  
TCTGTGGCTGATCAAACCAATTTTTTTTTATAATGTTGCATTTTGGTACACAATGTTGATGTTCTGATGTGAAG  
AAAAACAATCATATTTGGTTAAAATTAATAATAATAATGAAAATCAAAAAAAAAAAAAA

>24 c12941\_g1

ATATTTCTACTCTTATCCTTTTACCCCGCTGCTGCCCCGCTGCTGCGGCTCCCGTTGCCGCTGAGAGCTCCC  
GCAAGAAACGTCAGGTCTTGCCTTACAGCACTGGTTTCTACCCGCTACTCTCCGTCAGTTGCACCCGTTCC  
AGTGGTAGCCAAGACTACATTGAAAACCTGCACTGCCGAGGCTGACTTGACTGCCAAGACTCCGGCTAGTA  
CCAACAACTCGATTTGAAGGAGAAGAGCGTCGATGTTGCACTCCTGTGGCGTATCCCACTCCTTACGCTT  
ACACCTACCTCATGCCTACCCTTTCGTCAACGGATTCTATGGTTTTTATTAATGTCTAGATGGAATTGATGTG  
CTGGACAACGTCAACAAGATCTTCCCCTGATTCCTGTGAAAATTAGATGTGTTTTGTCGATGGAATTCATTTT  
GCAAGCACGAAAACAAATTATTGCATTGATATTCAAATAAAATTGGTATTTCAAACAAAAATAACAAAGGAAT  
GAATTCATTCCACACAGCTTGTTTCAACTGAAAACTTAAATACAGCTGCGAATTGGGTAGAAACCAACC  
TAAATACAAAGTATCGACAAAGCTCATTATTCTAATCATAAACCTGTTTTTGCCGTACACACTATTGTGTTTCG  
TCTCAAATAACATATGACGAGTTTTCAATAATTATAAAAAGCATAACGACAGCATTTAA

>25 c19155\_g1

TTTTTACAATACAAACTCACTGTATTTTGGCGCCACGAATCGAGACACGCAGTTTTCGTATAAAAAATAATCA

AAGGAAAAGAAAACACACACCAGAAAAAAGGGAGTCTTAAAAAATCACACGCAGAGAAGATTTTTTTTTTC  
TCCGTGAACATAAGTAGAAAAAACAACATCGTGTAACAAAATATGCATTTCCGATTCTGGACCTTCAT  
GGAAAGTTTTTTTGACAAGCTTGACAGAGAAGTGGAGAATAATCAAACAGAAACGGATCAAACAAAAGGAG  
AGAAAAAATAAATACTGTCACCCTAAAAACGTGGTGGAGAGAATATTGCCAAGAAAATTAGAAGATAGAA  
AAACGTATGCAAATCTAGACTTGGAAATCCGGAAGATGTAGAAAAAAGACTATTTGGGGACTACACAC  
CTGTGAGATGAACTCATACTACCAAAAAAACCTAATAAATCATATGGAAAAGAGCGGAAAAAATTTT  
TTTTCAAGAAAAACCGTGGTGTACTTTTTAGTCCCTGCTTAAAGTATATTGTCACAAAACAATTCATTCC  
CCACGCAAAAAAATATCTACTAAAGGCATATAAGTAGAATACCAGAAGGCGCAAATACACGTACGAGG  
GGAGAACGGTGAGCCCCGCCGATATCAATTGCAAAAAGATGTTATTCAATTACCGGCATGGAAGACTGATT  
GATTTCAATGGTCCCAAACTCGTATTTCTTAGTTTTGTCTTACTTCTATTTTGAGCGCTCTCTAATTGGGTGTT  
TTTTGTGTTAGATGAGTGGGCGAAAATGTAGGGAAAATAATCTAACTTTGCTGGGAGAAAGAGATGAGGG  
GGAATTAATAAAGATCGCTAGATAACATTGGCTGAAGACAACCTTGTGAGTTCTGATCAAGCTGACG  
GGGTCCCACCAATGGCGTCTTGAATATGCTGGTAAACTGGTTCCTTTCCTCGAATCGGCGTGCCAAATCGC  
AGATCAATCTTTATAGACGAGAGGGTCAATATTCTTCCGAGAAGAAGGAGAAACAAACCAATCTCCAATCT  
GGCATTGCGAGCCACCAATCAACTTCATTGCGAGGTGCCAAGCGGGCCTGTGCTCTCAACAGGTACATG  
CGGGCTTGAGAACCAAGACAACAGCCAGACGGTACAGCAGCGCAAACCGCTCACAACCGCCAACAAG  
ATGAACCAGAACAGAGGAACACGTAGATCTTTTCGTTGACAATGTTGAGAGGAAGAACGCACAGACCGTC  
GATACGCGTTGTCGTACCGGAAGGACCGAATTTGTGGAACGTGCATTTGGTACTTTAGGGAAAACCTTGG  
CCATGGGATCAACACGGTCTTCGGGTTCATTTAGTCATGCTGATAACATCTCTGCCGTAGGTGGTGAATTC  
TCCACCGAGGAAGAAATCGACGAAATAAATCTGACCGATGACGTTGATAAAGTTGAGTACTTCGCAGATAAA  
GAATCGGATAGCGTAGAAATTGTGGTTGTGCAAGTTAGAGGCAAAGTATTCGACCAATAGTTTTTTTCGTTT  
ATTTTTCGTCTCAACAGCGATGATGGGGCAGTTGAGGTCTAGGACGAGCATCTTCATCTTCCGGCTTCCCAT  
GTCTTCCACAGGTAGCGGGGAATGTAACAAAAGGGCCTGGAAGAAGAGGACGAAGCAGACCCACTGG  
TAGTATTTATGGTATTTGACTTGATCGCCTTCTGATGAGGGCGAACTCCAGGATGAGGAACATCTTTCCAA  
TCGTTTCGGATGCCAACCGATTGGGGATGGTGAATGTAGAATGGATCCAACAGTACGTGTCCATAACATTGC  
CAGGTACGCCCTCCACGATGCGATGCGATGGGGTCCCAATGACTGGCGTGATGTTACCACCAAGGAAAAG  
GCAATCAGCACAATCACCGTCGCTTTGTAATGCAGGCGGAAAATGTTGTTGTCATATTGACAGAATCGAGC  
TTTAGCAAGCCCTTACCGATCCGAAGACGTCAAACATTTTCGACGACTTGGTGGTGTCTTTGTTTCAAAAA  
AAAAATGTAAGTGGCCTTTGCAATCGGAAAAACAAAAGGTGGCGGAATGAGGTCTTACGCCACAGCAAT  
TCACTCGTACGCTTACCAGCAGAGGAAGACGCGCCAGAATTTCACTCGATTTAAACGACGTGTCTAATAT  
ACGACGAGCAACGTGCCACGCAACCGACACTGCCTACAGCTCAGCTCAGTCTGACAACGATGGCACAGTA  
AAGCGATTATTGGCCGTAGAGGCGCTTTTACCCTGAGGCCGTCTGCAAGGGGACACGGAAATAAAGTCT  
CGCCACGGGTAGAATGGAAAGTACGTGATCTGGAAAAGTCTATCCCCTTCTCTGGGACAGATGGCGT >2

6 c16110\_g1

TAACAGTTCAAGTAGAACAACTATTTCTGGTGTATTTTGAAATTTTCTTTTGATAGTTGTAACACATCGTTTTT  
TAATTGATCGAAGTCCTTGTCTTTTCCCATGCTACAGCTCAGTGGTGAGTAAATCGATTGGTAAGCCCTGG  
TGCGACTATAGCGCCGAGTTGTTGGCGTCTGCAACCTAAAAAATACCCGGCATTTCGAGATCGAACGTGT  
ATACAGCGAGACCCTTCCATTCTGTCAGCGCCTCCGTCAGACTAACAAGTGTGCAGACCTCTAGTAACAG  
AGCTGACTAAGTTCTCTACACACCGAAATTCGAACACTTTTTTAAATCTCTACTTTAACAGCAAGAAGTGTA  
TTTGTAACTAAATGGCTGACACACACGTGAAACCAGCAGCGACTTGAACCAAGATTCTTTGGACGGCG  
CACAAGCTTCCGTCAGCGAAGTTGGATCAGCTGAAGAGTTGAGAAGGAAAACACTGAAGACACCCCTTC  
TGGATCTCATGGAGAAGCTGACGGTAACAAAAAGAAGGTGAAGCAGTTGATGGAGCTAACGGAGAAGA  
GAGCCGTGAGGCCGAAGATGCTGCCGTTCCCGCTGATGCCACCGCCGCGGCTGCTGTGACCGAAAACGGT  
GCCGTTGAAAGTGAACCCACGTAATGGTAATGGAAAATGCGATGAGAATGCTGAGGCAGATTCACGGA

AGTTGATGGATCCGCAGCTGAAAAGAGGAAATCAGTTGTCGAAACAGAGGCATTGAGCATTCTCCCAAGA  
AAGCTCGAGTTGAAGGCACTGATGAAGATGTAATTGGCACAGAGGAGGCTGCCCTTCCCACTAACGGAAA  
CCACGAAACTGTCGCGTAAATGGAACAGAAACATCCGGCCCCATTTTTCTGAGTAACCTTCTCCCTCCAA  
ACCCACTTCCCCGTTTTACCTATTTTTATTTGGTAAGCAGTACTCTTGCACACTGTCTGTCTATGAATA  
AGGATCAACGGCCATCACTTGTGATTCAAATATGTATCTCATCATCTTCATTTGACGTGGATTTTTTTTCAAC  
AAAAAGCGCGTGCCTCACTCATGTTGACTTAACTGGAAGGGCAAATAAAGAATCAACTAAAGAAATTGT  
TTCACAATGATTTTTGAATCAACTTTTGATGGTCTCCGTTTTACCTTTTACGAACGAATAAGAATCTATTATG  
ATATTCGTTGTCAGTGTAGGATAGATTTTGGCATTGTCGATTGATACGAGCGTCATCTTAAAGTAATCGGTTAA  
AATGTTCAACCCCATAGCGCAAGTTTCTCACATCGACATATCCATGTTACGTTATGTATCCAGCTCACATTAAT  
CGTCTGATGAACGACTTTCTAAACACGGACATTTCTGCACCTTCGTTCCGATGGAATGCGCAATTTGTCTTTG  
ACATTTAGCGGTCTTTTTTTGATTTTTGAAGACAAACTTATTTAAAGATTGGTCGTTAACGTAAGACTTA  
CCATCTACCGATCAGTTTCTATGTTTATTCTATCAGCTTTTGGCGATGGCGATTCCATCTACTTTTATTAAAC  
CTGGGTGTTGTGATTTCTTCTTAGCTCTTCCGACATAAAGTTGCATCCGTTCAAAGTTCAAAAATTTGCG  
CGCGCTTACCCAAAAAGCTGCCGCCACCTTCTATGTGTCCCTCGCGCACTTACTGTCTGTCCATTTCT  
AACTATAATTCATTTTTTGAAGTCGTCTCATCGTTTGGTAACTTTTCGTC AACACCGACATTATAGAGAAG  
CTCGGTCAAAAAGTTAATCTTTTCTGCAATACAGTTTCTCTTTCCATTTCCCTTCTTTTTATTACCATA  
CAGTTCCGGTATCTTCACTTTTTATGTTATTTTTCTATTCGTTTTGGTACCAGTCGCCTTCGGGTTCAATAA  
ACGGAATTGTACACTAAGAAAA

>27 c9752\_g1

GATAGCTTACCTGTTTCATAACATGACCGCACCTGCAACAATACCGCACATCCGTACCTCTAAAAACAAAAAC  
AGCGTACACCGTCCGGTAGAAATAGGGCTACTACCAAATAGAGAAAGCCCAAGATGCTCAAGGGCTCTGAC  
AGGAAATGGCGAACATGGATGTCGTTCCAGTCTGCTAGCTACTACTGGAAATTTCCACACATCCGACAAATTT  
TCCAGACTGATTGCATTAATGCTTAAAGTTAAATTTTTACGTAAATGGTCAAATTTATATTCAATGGAAATGTTG  
CGGTATTGCTGCAATTGTATTGTCTGAAAGCAAGAGGGCAAGCCTTAATGCATGCACAAACAAAGCGAAAG  
GACTTGGTAATAGGAATTTCCGATTTGTATATAATAAAGGAGTGGTGGGGCGAAGAGCAGATCGATAGCTTC  
AGTTGGAAAATAAATAAAGGAGTATGAGGAAAAGGGCGAAGAAATGTAACAGTTAAACAATAGCTTTGAGC  
AATTTAAGCATTGTCAGCTTCGGCATCGGGATCTTCTCAAATCCGCCTCATCATCAGCCGTAGCTTCTTGAT  
ATTGTTGGTACTCAGAAACGAGATCGTTCATGTTGGATTGAGCTTCAGTGAACCTCATTCATCCATGCCTTC  
ACCAGTGTACCAGTGGAGGAAAGCCTTACGACGGAACATGGCCGAAAATTGCTCCGAAATGCGTTTTGAAG  
AGTTCTTGAATAGCTGTCGAGTTGCCAATGAAAGTCGCCGCAATTTCAAACCACGGGGAGGAATATCGCA  
GACGGCTGTCTTGACATTGTTGGGAATCCATTCGACAAAATAGGAAGAATTTTTGTTCTGAATGTTGAGCATC  
TGCTCGTCAACTTCCTTCATGGACATGCGGCCACGGAAGATGGAAGCTACGGTTAGATAACGGCCATGACG  
AGGATCACAAGCGGCCATCATGTTTTGGCATCAAACATTTGCTGAGTGAGCTCTGGAACAGTAAGGGCGC  
GGTATTGTTGTGAGCCTCGAGAAGTCAGCGGAGCGAAACCAGGCATGAAAAAGTGCAGACGAGGGAATG  
GGACCATGTTGACGGCAATTTTGAAGATCGGCATTGAGTTGGCCTGGGAAACGGAGGCAAGTTGTCAC  
GCCCAGATGGTAAGCGAGACAAGGTGTTGAGATCGCCATAAGTGGGCGTGGTTAGTTTGAAGCGTGGC  
AAGCAGATATCATAAGGCGCCTCGTTGTCAATGCAATACGTTTCATCTGTGTTCTCACTAGCTGGTGGACAG  
AAAGAGTTGCGTTGTAAGGTTCAACAACCGTGTGAGAAACCTTGGGAGACGGAACCACGGAGAACGTGTT  
CATGATACGATCGGGGTATTCTTACGAATTTTGGAGATCAAGAGGGTTCCCATGCCAGATCCAGTACCACCT  
CCCAAGGAGTGGGTTAGCTGAAATCCCTGAAGGCAGTCACATCCTTCTGCTTCTTCTGACAACATCAAGA  
ACAGAGTCAACCAATTCAGCCCCTTCAATATAATGGCCCTTAGCCCAGTTGTTGCCAGCACCAGATTGACCA  
AACACGAAGTTGTCAGGCCTGAAGATTTGGCCATAAGGACTAGATCGAACAGAGTCCATGGTACCTGGCTC  
CAAATCAACAAGAAGTCTTGGAAACATATTTCCACCCTGCTCATTGTAGTAGACATCAATCCTCTCTA

GCTGCAGTTCAGACTCGCCTTGGTATACACCATTGGGCTGAATACCATGTTTCATCAGAGATGATCTCCCAGAA  
CTTGGCACCGATTGATTTCCGCACTGGCCGACTTGGATGTGGACGATCTCACGCATTTTGGCAAGTTTCTTT  
AAGAGGAATGGGTGGGACTGCAGCGAACAGTGCCTACTTGGGTAGTACTCGCTTAACTTTTCGTGTCGAT  
ATCGTGAGTAGCATGACATGGGGTGGTATATATACCTTCCGATCTGGCAGTGGTAGCCGTAGGCTAGCTAGCG  
AAACTGTAGTGCAACGAAATCTGGCAAGCTCGCCACATTCAATTGACACGCCTATTTGAAATTATTTTCGAAA  
TTAATGATAATTTCTCAAATAATTTTTTTTTCAGGTTCCATTCCATTTGTTCTCGAAGCAGTGTGCCGTTTTTTG  
CTATCGATATTCTGTATCGATAAAAAATGATACAATAGTATTTTTCTGAACATCTGCAATATTTACTGTAAAATC  
TCATGCAAAAAGGTACGTACAATTATCAAATATTGTTCAATTTGAAAGTAGTATTCTCCTCTTTTTGAGTTTAT  
GGCATCATGACTTTTTCTGTATGCTCGATTGCCCTGATTCTTTTTAAAGAAGATTCTAACATCCCTAATTTTTT  
GCCTAAAAGCCTTTCAATTAATGACGAAGAAAAACAGACAAGCGCAATGCAGGTTTGTGGTATGAGAAACA  
TGCAATGAAACTTAGTCACGCCATCACAGTACACAGGGGCTATTGTCTTTCAAACAGTATGCCATCAATCAC  
GTACTCCTCGTCAAACCTCATGGCACTATCGGAGAAATTTGACAGGGAAAACTTGTGCGAAAACGGTCATC  
CTACGTATCGAATTTTTATGGTGTCTGTGCCTTGTGCAAAGACCATTGAAGGTCACATTTCTAAGACTTATTT  
GGAAGTTACGATTGAAAGTTGAAACGAAAAATGGAAGAAACAAGAAGGAAGAATCTCCTTTCACGCCAC  
TAAGACCATCTAACGGCGGAATATTAACACTACGCCAATATTTATGTATCTTAGAAGATAGCACTGGATATAAG  
TTTTTTTTTATTGCAACAAGTAAAAATTTCTTTAACATTTACAGCTACTGTTTTTATTTCTCGAGATCGTGAGC  
CCTCAGTCACAATGCAAGATCGTGATAAATATTTTGGCGTACTAATCGCTTGGTAATGTTTTTGCTATTTCCG  
AGATTTTCTCCATATCCCATTTTCTGAGTGATTGTTGTGGATGCAAAAAGCATTGAAATTCTATGCTGTCTG  
GGTGCATTACTCGAGTATGCTTCTATAAAAAAGCTTGAACCTCAATTTAAAAAATTAGTTTTTAATCCCAAT  
CTGATTTACTTTTTTATATTGTCAGAACAATCATCAGTGGTGTCTAATGAAAAGTAAATCGAGAATCCCTACTC  
CCTTTCCTCCCTTCTCTTCTAAAAAAGAAAACCAAACAAAAAATTTTTGGTACAAAACCTGTCAGACCA  
GTGCTTTTTTAAATATGAAATAGAATAACTTGTAAAGAGATTTGTAAAGGAAATATTTCCGTTTAATAATTTAC  
ATTTTTTTTTTTTTGCTGTAATTTTAAAGTTTGGTTACGATTTCCAACACCAGGTGCATCACCATCTGCCTGTT  
TGTCGAACTGTTGATCGTTTGAAGCTTGTAACTAGTTTGCCAAGTGTTA

>28 c15362\_g1

TTCAACTTGCGAGGTTGTGTCCGGTCAGACGTATATAAAGGCCGCCGCTTTGCTTCAATAGAATCAAACAA  
ACTCACAACAACAGACTAAAGCAGTTCTGTGTTCAAAGCATCTCGTGATAACGCTCGTTTCAGTCCAGAAG  
AACATTTCTTTTAGAGGAAAATGGCAACTAACACATTGTAAAGAACGTCATTGCTAAGCGCTTGATGTCG  
ACATCCGGCCAACTACTAGATACATTTCTCCGGTCTCAGCCCTAAGTCAAATTAGTCATAAGGTCAGCCCGT  
TCGAGCAGCGATTGCTCGTGTGGAGCGGGCAATTCAAAAGATTACCGATGTTCCCTCTCTGTCTCACGCG  
ATACAATGAAAAGGCACGCAATCATTACCGGATCCGCGTTAATCTCATCATCGCCGGTCTGACGGTTCTAGG  
CTCGTTCCCATGGTAATCAGCGGAAAGAACGCAGCCCATCGCGGGGAGAACATCAACGACTACAACGCCG  
AATGGCATCGAAAATACAACGAGGCCCAAAATACGATCATTAAAGTGATAATAGAATTATTATGATTTGACA  
GTCCGCATGAAAAAAAACGACGCAAAGAAATGAAGTGAATGTGAAAAGTCAGGATGTGAACAAATTGA  
CTGTTAGATGTCGTGGCTTGTGATAATGTGACCCTTTTCACTTAGATTTAGCTTTAAAAATAATTTTTCTTTTT  
GCTTCTTGCCCTTTCAAACGTTATGTGATCATCGTAACTGGTATTAGTAGACTTGTGAGTCTCTTTTTTTTT  
CAATAGGTAATTTTTCTTTGAAATCGACTTGTCAAAAACAATCGTGGCATTCTTGTATGTGTTATTCGAA  
AATAAAAATACAGTTGAAAGTTCAAACAATATGTGTCAAAG

>29 c13754\_g1

TTTCTATTTGCTAAACCATTATTGAATATTACCAGAATTTAGAGAATTGCAACACTGCTTCAGTGTTCGACG  
CGGGAAAAAGTAAACCTCGTAGAGGCAACAAAATCCCTATAATTTTAAACAACACCTTTTGAATGTGACA  
AAAAGCCAGCAGGGTAAACCGTGAAAATTTAAAGATGATTTAATTGGGAGGGGGGTGCTCTGTAAATTTT

AAATAAAAGTAACCAATAAAAAAATTAACCTTTTGCTCCGCGATGTTGAACGCATTAGGCTTCATATTCATTTTT  
TGTTTGCTGGATTTCTTTTGTGATCTAGAAGCTAAAAACGTCAACTTCATCGCGTCCTCTTGACATTATTTCCG  
AGTCGGGATTGAACGGGCTAAAATCATTACGGGTTTTCAACAGTTTTAGACATTTGCTGCTATCCAGTCCAA  
GTATGAACCAACCTCCCGTAAATGCCTGGATTTCCGTTACGCCGATTCTTCACCGTAGCTGACGACGCCA  
ACTTGTACGAAACGGCATTGTGACACAGATTCACCATAATCTGCCACAAGAGGGCCGCGCCACTGTCACCCTGA  
CACGTGTCTTTTTACCTCCATAAGCGCAGAGCATATTGTCGAGAATTTGATCTTTCTCTCCGTAGGTTTCTTG  
GCACTCTTTGTTGCTCACCCTGGAAGGACGGCGTGTGCTAGATATTCGGAAGTTTCGCCTTTGTATTTGATT  
GTTCCCCACCCCATGCCAATCGTTTCCATTCCGTACGTGGGCAAACACGACGGTGCCAAGCAAATGGGTTGA  
ATAGTGCCGTATATCCACAGGCGATTCCATCGTCAAAAATAGCAAAATCGTTCTCAACTGTCTGGGCGTTGTA  
TTCTTCGTGAATTTTTCATGTTTACGACCTTTCGTTTTTCTGGGAGTCGCTCGATGTTTTGGTAATCTTGTGCA  
TTCCGAGTCTTACATGGATGTCATCCGTTATTAAGTTTCAGTTTTCTTTGGTAACGCAGTGGGCAGCCGT  
TAGGATTTTGGTGGAGTAATCAAAGACCCGCCGCAAAAAATTTGAAGGTCTTCACTTTCTCATCACCCATA  
GCGAGCGCCACCACGAATGGATATTGATTCCGAGTGGCTTCTTCACTCTCCGTCATTTAAACGTGCTATTTG  
ACCTAGCCGTTGAGGTAAGGAGCGAAGATTGTTGCTTTCACAGAGAGAATCTTCGGCAATGGATGGTTGA  
TCACCATCGTTCTTGATAATGGCAGCGGCGTACGCAACTGGACTGGCAACAGGAGCGTCAGGGGCAGGGG  
CATCTGGGACAAACGCGTACGCCACCGGAGTGTACGAGGAGCGGCAAGGACAGGAACATCTTCGACGG  
GCATGTACGCTACCGGGTATCGACAGGAGCGGCAAGGACAGGAACATCTTCGACGGGCATGTACGCTACC  
GGGTATCGACAGGAGCGGCAAGGACAGGAACATCTTCGACGGGCATGTACGCTACCGGGGTATCGA

>30 c16548\_g1

GGGTCTTTTCAACAACTGTGGTTTTTCGGACTGACAGATCTTATTCTCCCTCACCGAGAATACACGCGATAC  
TTTTGTTAATTAACAACAATAAACTTATTTTTGTGATTGGGTTTGGGATAAGTCGTCATCAAATATTTAA  
CTTAGAGAGACAATTTGAGGTGTCAGTGTCTGTGGCCAGTCACAAACAGTTTTGGCTGCATTCCACACG  
GATTCACCCGGGCAATCCAACAATCGGGGAGATCCCTGAACGCACCAGTAGTACTTGCTGCATTTTTCGTGA  
GGCCAGTATGTCTGGACGTTGCAGTCTATTCCGGCGACATCAACTGGCTTAACTACAACGTCTGGATTGCGT  
GTTGTTGTTGTTCTGCTGGTTTACTTGTGTGTGGGCGCTCATCGACACAGTAGGGTCTGGTTTCCAAGGT  
TTCCACCATGTTACTGCGTTGTGGTTGTCATAGGAGGTGGGATTGGAACAATATAGTCTTTTCATCCGTCGT  
AGATGACCTTCATCATGGAATGATGGCCCTTCCCGCACAAGTTGTGGAAGTCATCCATATCAATGGCCCAAGT  
CATTGCTCCACCATATCCCGTGCTCGAATAAAATCCATTTTAAATTTTTCAGGGAGTCTCGTCTTCGTATCCGAT  
CCACTGGCGATCTTTGTGTGTAATGGAACCTTGCCGACGTCGTCGTATCGCTTAAACCCAGCCGTCAGCTGG  
ATCCAGAAGCTTCATGCAAATTTGCTAGTGCGCCATAAAGCCGGATGCGTTTGTATAAGGACCAGGTTCTCC  
ACCCCCGGCCATTTGACGATATATGCTCCCAAGTCATTGCTTTTGGGATCACCTAGAGTGTAAAGTACGTCCG  
TAAAAGGGTGTACCTACGACAAGCTTATCTCTTGGGCAACCAAATTTCTCCACAGCAATAAGCCATCGTTCA  
CGTTGAGTTTTTCATAGGCGTACTGATCCAGACCTGGGCGACGATAGAGTTGCGAATGAACGTGAGCAAATC  
CTACCCAGTTTCTCGCAGATCGTATGTCATGACGTGGATAGCATCGAGCAATTGGCATAATTCAGGGACATG  
ATATCCTTCTTGCAAGCGGAATTTAGCAACAGGAACCGCAGCTGTTAGTTCCCATCTTTTCCGACAGTGTGC  
AATGCAGCGCGCAATTCGGAACAAGAGCAAGGAAGGTTTCTTGTGCGCATAGGTGCCTCCGCGATCTGC  
AGCGCCCGGGTATTCCAATCAAGATCAAACCCGTCAAACCATATTGGTTCATATATTCTACGACACTGCTAA  
CGAATGCTTGACGACGCGCCGGCACGGAAGCCATTTGCGAATACTTTTTGCCACCTTCACCCCATCCCCGA  
CAGCCAGCATGGGTTTCAAATGCGGATACTTCTTTCAAAGCTACAAATTTAGCGTAACCTCCTTGTCTATG  
TCTCTCTGATCGAGAACAAGAACGCCCCAGGTGACGTTGCTGACACCACAGAAAGAATAAATTACGTG  
CGTACACATTTACCGGGGATGTCGTCGATGTCGTACGAACCTTACCTGGGCGGTAGACTGCCAGTTGCT  
GAAGTAGCATACGCTTAGCTAGGCGATCGGGCAAGGCATTTTCGTGAATTTTGGCTTTCAATGACGTCCGA  
TGAACGAGGTTGGGCAGCGAGCGCAACTGTAGAGTAAGTGCGCATATGAAAATCAAGGGCTGCCACATTT

TAATCAGCCCTGTCTATATTTAACTTAAGTAACACTAACACACGTCTCAACCTGCTGCGTCCTCACGATACGAC  
TGTCGAGCAAGC

**Table S2. Primers used for qPCR.**

| <b>Gene ID</b> | <b>Forward (5'-3')</b> | <b>Reverse (5'-3')</b> |
|----------------|------------------------|------------------------|
| c22292_g2      | GCCGATGAGCTACGATAA     | GCCTTTCTTGTCTTGATTGT   |
| c36850_g1      | CGGTATCTACATCATCAG     | GAATCGTAGTTCGTTGAG     |
| c22292_g1      | TGCTTACTCATCGGACTC     | GTACAAGAATTGGTCGTCAG   |
| c14229_g1      | GGATACTCTAATGGCGGATA   | AGAAGTGGTCGTTGGTAG     |
| c11892_g1      | AGTAGTTGCCGATGTTCA     | TCTTGGACCTCTTCTTGTT    |
| c21753_g2      | GAGAAGGAATTGGATGAGATG  | GAAGGCAGCGATAACAAC     |
| c8533_g1       | GGTTGACGAACTGGAGATA    | AGTTGGCTGACCATAAATAGT  |
| c22798_g1      | GCGTTATCGTCCAGAGTA     | GTCCTCCTCACCTTCAAT     |
| c23345_g1      | GCCTACTCCTACGATGAC     | AAGCCTCAGACTCAACAT     |
| c23476_g2      | ACTACTGGTTCATCTCTCC    | CTTATCGTTAGCCTTGACTTC  |
| c18434_g2      | CAAGAAGCGTCAGGTTATC    | AGAGTAAGCATAGCCAGAAT   |
| c16911_g1      | CTCGGTCGTATCTGTCAT     | GGATGTCCATCTTGAGTCT    |
| c16323_g1      | ATCCAACCTTGCTCATTCC    | GTAAGGTTCCACAACAGTATC  |
| c22501_g1      | GTGAAGATGAAGAGATGGAAG  | TGGAGGCTGCTTAGATTC     |
| GAPDH          | AGGAAGCCAGTTATGATGA    | AAGTCTTGTTGAGAGCAATG   |
| ACT            | CCATCCACCATGAAGATTAAG  | CTCGTCGTA CTCTTGCTT    |
